# Supplementary material for: Genome-wide analysis of the SPL/miR156 module and its interaction with the AP2/miR172 unit in barley
Source: PubMed Central journal article supplement (PMC5935748; doi:10.1038/s41598-018-25349-0), 2018-05-04
Supplement: 41598_2018_25349_MOESM1_ESM.pdf [file 41598_2018_25349_MOESM1_ESM.pdf]

**Genome-wide analysis of the SPL/miR156 module and its interaction with the  
AP2/miR172 unit in barley**

Rajiv K. Tripathi<sup>1</sup>, Phil Bregitzer,<sup>2</sup> and Jaswinder Singh<sup>1\*</sup>

<sup>1</sup>Plant Science Department, 21111 Rue Lakeshore, McGill University, Quebec, H9X  
3V9, Canada

<sup>2</sup>USDA-ARS, National Small Grains Germplasm Research Facility, Aberdeen, ID  
83210, USA

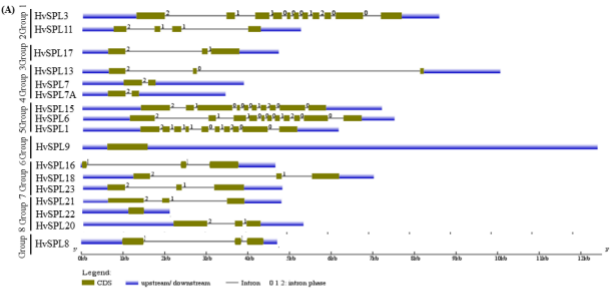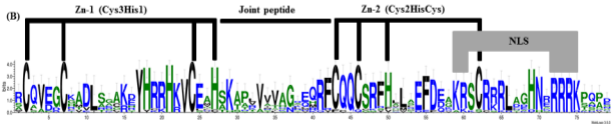

**Figure S1. Gene structure and sequence logo of barley SBP domain. (A)** The 5' upstream, 3' downstream, exons and introns are represented by boxes and lines, respectively and their sizes can be estimated using the scale bar at bottom. Blue boxes represent 5' and 3' un-translated regions, green boxes represent exons whereas introns are represented with black line. The numbers indicate intron phases. **(B)** Sequence logo of SBP domain was obtained from Weblogo. The overall height of letters represents residue conservation.

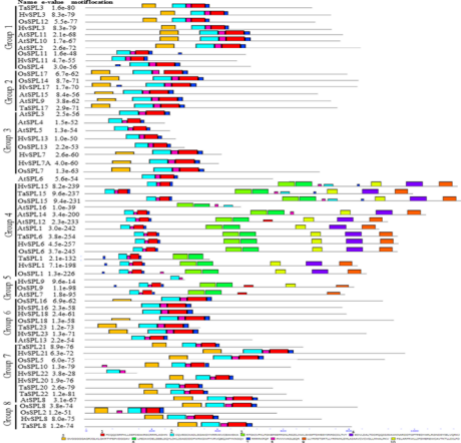

Figure S2. Motif search in SPL proteins. The distribution of 10 conserved motifs is indicated by numbered colored boxes.

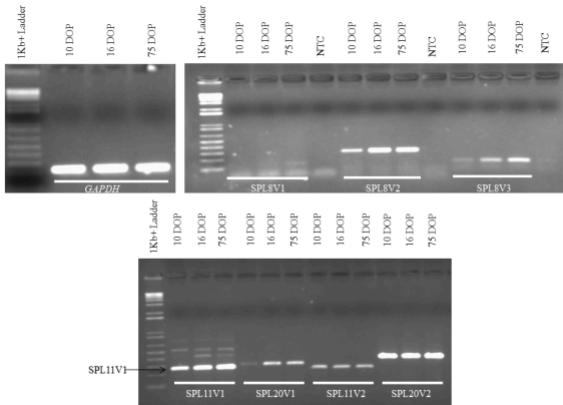

**Figure S3.** Full length gel images of semi quantitative RT-PCR of alternative spliced variants of *HvSPL8*, *11* and *20* genes in 10, 16 and 75 DOP of barley growth and development. *HvGAPDH* was used as control.

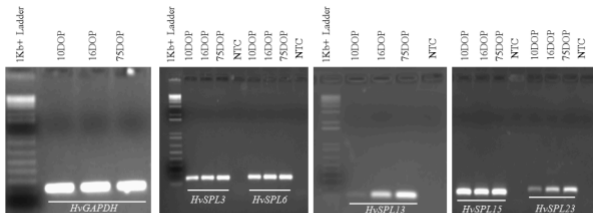

**Figure S4. Full length gel images of semi-quantitative RT-PCR of *HvSPL* genes in vegetative and reproductive phases of barley. Expression of *HvSPL3*, 6, 13, 15 and 23 in 10, 16, 75 d-old plants. *HvGAPDH* was used as control for semi-quantitative RT-PCR.**

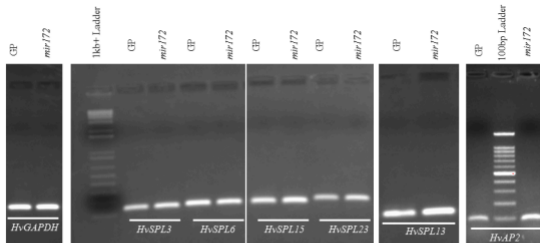

**Figure S5.** Full length gel images of semi-quantitative RT-PCR based expression of *HvSPL3*, *6*, *13*, *15*, *23* and *AP2* in the spike of *mir172* mutant and wild type GP. *HvGAPDH* was used as control for semi-quantitative RT-PCR.

Table S1. Coding sequences of 17 barley SPL genes.

>HORVU0Hr1G039170.6 cds sequence

ATGGACTGGGATCTCAAGATGCCGCCCGGCGCATGGGACCTCGCCGACCTGGAGAGCGAC  
GCCGCGCCGGCGCCGGCCGGTGGCATTGCTAATGCGGAGTGCTCCGTGGACCTGAAGCTC  
GGCGGGCTCGGCGAGTGCGGCGCTGCCCCGGACACCCGCGGCCTCGGCAAAGCGCCGGCC  
GAGGCGGCGGCGTCCGCCAGCGCGGCCAAGCGCCCGCGCGCGTTCGTCGGGAGGCGGCGCG  
GGGCAGCACCAGCAGTGCCCGTCTGTGCGCGGTGGACGGGTGCAGGGCCGACCTGAGCAGG  
TGCCGCGACTACCATCGCCGCCACAAGGTGTGCGAGGCGCACTCCAAGACCCCGTCTGTC  
ACCGTCCGCCGGCCGCGAGATGCGCTTCTGCCAACAGTGCAGCAGGTTTCACCTGCTTACG  
GAGTTTGATGAGGCCAAACGCAGCTGTAGAAAGCGTCTTGATGGGCACAACCGTCCGCCG  
AGGAAACCGCAGCCGGATCCGATGAATTCTGCAAGTTTTATGACGAGTCAACAAGCATT  
TTGCGAAACCCAGGAACAAGGTTTCCATCATTCCAACCTCCAAGACCCGGAGCAAACTGG  
CCAGGGATCATTAATAACTGAGGAGAACCCCTATTACACACATCAGCTCCCTCTAGGCATC  
AGTAACAGGCATCATTTTTGGTGGCTCTACATCTACTTTTCGCGAAAGAAGGACGGAGATTT  
CCTTTCCTACAGGAGGGCGAAATAAACTTTGCCACCGGTGTGGCACTTGAGCCTGCAGTG  
TGCCAGCCGCTGCTCAAGACGGTAGCTCCTCCCGAGAGCAGCAGCAGCAGCAGCAAGATG  
TTCTCCGATGGTCTGACTCCGGTGTCTGACTCGGACTGTGCTCTCTCTCTTCTGTGCTCAGCT  
CCGGCAAATTCCTCCGGTATCGATGTTGGCCAGATGGTCCAACAGACTGAACACATCCCC  
ATTGCCAACCTCTGTTCTCCAACCTGCAGCAATTCAGCAGCTCGTCCCTGGTTCTCGCGC  
ACCCAGGCTTCCACCGGCACCGTCTCAGCGACCGGATTTTCTGCCCCGTGGTGGAAAAT  
GAGCAGCTGAACAATGTCCTAACCTCGGACAACAATGACTTGAATAACAATGGGATTTTT  
CATGTGCGGAGGCGAAGGCTCCTCAGACGGCGCTCCGCCATCTCTGCCCTTCCCGTGGCAG  
TAG

>HORVU7Hr1G051400.2 cds sequence

ATGCAGAGGGAGGTGGGGCCGCAGGTGGCCTCCCCGCTGTACCTGCACCAGATCCAGCCG  
CTGCCTCCCCATGCGGCGGCGGCGGCCAGGAAGCGCGGGACCCCGTGGCCCGCCGCGGAC  
CCGCCGGAGAACGCCGCGATGGGGGCCGGCGCCGCCGCGGAGGGAACCTGGAACCCAGC  
ATGTGGGACTGGGACAGCCGCGCCTTACCGCCAGGCCGTCTCCGACGCGCTCCGCCTC  
GGCGGCGGCTGAACCACCAACACCACCAGCAGCCGCCGCCGCCGCCGCCGCCGCCGCCG  
GCGACGGCTGCCGAGGCGCAGCGGCAGGGGCGCGGAGGTGCCGGTGACCTGAGCCTTCAG  
CTGAACCTGCGGGAGGAGGCATCGATGGCGATGGATGTGAGCCCGACAACCTACCATGTCT  
TCTTCGCCTTCTCCGCCTGCACGGACGTCGCAGGAGCAGGCTGCTAGGCCTAGCAAGAGG  
GTTCCGGTCTGGATCGCCCGGAACTGCTTCTGGAGGAGGTGGCGGCGGCGGTGCCGGAGGG  
AGCGCAAGCGGAGGCGGGAGCTATCCCATGTGCCAGGTGGATGACTGCCGCGCGGATCTC  
ACCAGCGCCAAGGATTATCACCGGAGGCACAAGGTGTGTGAGATCCACAGCAAGACAACC  
AAGGCGGTAGTTGCCAACAGATGCAGCGCTTCTGCCAGCAGTGTAGTAGATTTTCATCCA  
CTCTCGGAGTTCGATGAGGGTAAGAGGAGTTGCAGGCGAAGGCTTGCCGGACACAACCGA  
CGACGGAGGAAAACCCAGCCAACAGATGTTGCTTACAGTTGCTGCTTCTGAAAACCAA  
GAAAACACAGCAAATAGGACACAGGATATTGTCAATCTGATCACTGTTATTGCACGCTTG  
CAAGGTGGTAATGTTGGTAAACTACCCAGCATCCCTCCGATAACCGGATAAAGATAATCTG  
GTCCAAATCATAAGCAAAATAAACTCTATCAATAATGCAAACCTCCCTGGGGAAAGTCTCT  
CCATCAGAAGCCATTGATTTGAATGCCTCCCATGGGCAACAACAAGATTCCCCTGTTCAA  
AATGCAACAAAGGTGGTCGACAAGCAGACTGTGCCATCAACCATGGATTTGTAAACAGTT  
CTATCCGGTGTCTTGGGACATCAACCCCTGAAACCAATACATCTCAGTCCCAAGGGAGC  
AGTGATAGCAGTGGTAATAACAAGAGCAAGAGTCATTCAACAGAGCCAGCTTGTGTTGTA  
AATTCCCATGAGAAATCAATTCGACCTTTTCCGGCAGCTGGTGTGATAAGGAGCAATAGC  
ACCCATGGAAGTCCACCTGAAATATATAAGCAGCCAGACCCGAGATACCCATCCATACTTG  
TCACTGCAGTTGTTTGGTAATGCCGAGGTGGACATTCCTGTAAATGGACACTGCAAAT  
AAGTACTTGTCTTCGGAGAGCAGTAATCCTATGGACGAGAGATCTCCTTCATCCTCTCCA  
CCTGTAACGCGCACATTTTTCCCCACCCGCTCAGTAAATGAAGGCATCAGACATCCTCGT  
ATTGCTGACTATGGAGAAGACGCTGCAACAGCTGAGATCAGTACCACTCGGGCATGGTGT

GCACCACAGCTTGAGCTTTTCAAGGATTTCAGAACGGCCAACGGAAAATGGGTCACCACCA  
AACCCACATATCAGTCATGTTATGCCTCAACATCTGGTTCAGACCATTCTCCGTCAACA  
TCAAATTCAGATGGACAGGACCGTACTGGAAAGATTATATTCAAGCTCTTTGGCAAGGAA  
CCTGGCTCAATCCCTGGGAACCTTCGTGACGAGGTTGTAAATTGGCTGAAACACAGCCCC  
ACTGAAATGGAGGGGCTACATTCGCCCTGGTTGCCTTGTACTATCCATGTATCTGTCAATG  
CCA ACTATTGCATGGGATGAACTTGAAGAGAATTTTCTCCAGCGAGTAAACTCGTTAGTT  
CAGGCTTCTGATTTGGATTTCTGGAGAAAAGGGAGGTTTTTAGTTTCGAAGTGACAACCAG  
TTGGTGTTCGTACAAAGATGGAATGACCCGCCTGTCAAAATCATGGAGAACATGGAATACT  
CCCGAGTTGACCCTTGTGACACCAATTGCTGTTGTTGGTGGGAGAAAGACCTCCCTCGTT  
CTTAAGGGCCGTAATCTAACGATCCCGGGCACCCAGATCCACTGTACCAGTGGAGGGAAAG  
TATATATCAAAGAGGTATTATGTTTCAGCGTATCCGGGTACTATATATGATGATTCAGGA  
GTTGAGACCTTTGACTTGCCGGGAGAACCAAATCTTACTCTTGGGCGTTGCTTTATTGAG  
GTTGAGAACAGGTTTCAGGGGAAACAGCTTCCCTGTTATTTTTGCGAGTAAAAGCATCTGT  
CACGAGTTAAGAAACCTTGAAGCTGAACTTGAAGATTCGCGGTTTCCCTGATGTCTCTTCA  
GATGATCAGGTCCATGATGCTAGGCGGCTAAAGCCAAGGGATCAAGTTCTGCATTTTCTT  
AATGAACTTGGCTGGCTCTTTCAGAAGGCCGCTGCATGCACACCTTCCATCGAATCAGAT  
GTTTCTGATTCAGAGTTGATTCAGTTCTCTACTGCACGGTTCAGACACCTTCTGTTGTTT  
TCAAATGAGCGGGACTGGTGCTCTCTACTAAAACACTACTCGAAGTTCTTTCCAAGAGA  
AGTTTGGTTCAGTGAGGAGCTATCACAAGAGACTCTGGAGATGCTCTCTGAGATTCATCTT  
CTGAACAGGGCAGTGAAAAGGAAGAGTAGCCACATGGTGCATTTGCTTGTGCAGTTTGTG  
GTAATTTGCCCTGACA ACTCCAACTGTACCCTTTCCTTCCAATTATCCCGGCCAGGT  
GGTTTACTCCATTACATCTAGCTGCATCCATTGATGATGCAGAGGATATAGTTGATGCC  
TTGACAGATGATCCTCAACAGATTGGTTTGAGCTGCTGGCATTCCGGTGCTAGATGATGAA  
GGGATATCTCCTGAAGTGTATGCGAAGTTCAGGAACAACGGCTCATAACAATGAACTTGT  
GCGCGAAAGCTTGTGGACAGGAAGAATAGCCAGGTTACCATTGTGCTCAACAAAGGGGAA  
ATTCATATGGATCAACCAGAGAATGCTGGTGCGAATAATTCATCTGGGATCCAAGCATTG  
GAAATAAGATCCTGCAGCCAGTGCGCCATTTTGGAGTCTGGCTTGCTAAGACGCCCTATG  
CGTTCTCGAGGATTGCTTGTGCTCGCCCTATATCCATTCAATGCTTGCCATAGCAGCAGTG  
TGTGTCTGTGTCTGTGTATTTCATGCGAGCTTTGCTGCGGTTTAATTCTGGTAGGACCTC  
AAGTGGGAGAGGTTGGATTTTGGTCCCACCTAG

>HORVU5Hr1G076380.9 cds sequence

ATTTTCCATGTGATTTATGTCACTATTCATCGGATTTTCATTGTTTCATTTTGGGTTCTC  
TTTGCTTTTCATTTTGTACTTTGCTTATYTTTMMTRTGTGTTTTCTTTGGTGTCTTCA  
ATTTTCATTGGAATTTGTTCCTTTTATGTTTTNNNNNNNNNNNNNNNNNNNNNNNNNNNN  
NNNNNNNNNNNNNNNNNNNNNNNNNNNNNNNNNNNNNNNNNNNNNNNNNNNNNNNNNN  
NNNNNNNNNNNNNTCGTGCGCGGTGGACGGCTGCAAGGCCGACCTGAGCAAGTGCCGCGAC  
TACCACCGGCGGCACAAGGTGTGCGAGGCGCACTCCAAGACGCCCTCGTCGTCGTCGCC  
GGCCGCGAGATGCGCTTCTGCCAGCAGTGCAGCAGGTTCCACATGCTTGCCGAGTTTGT  
GAGGCTAAGCGTAGCTGCAGAAAGCGCCTTGATGGGCACAATCGACGCCGAGGAAGCCA  
CAGGTAGATAGCATGAATTCTGGGAGCTTCATGACAACCAACAAGGGACAAGGTTTCGCG  
TCCTTCTCGGCTCCAAGGCCGAGCCAAGCTGGTCCGGGATCATCAAATCCGAGGACAGC  
AATCCATTCTACAGCACGCACCAGGTTAACTTCGGCGGCGCCACGTCGTCATACTCCAAA  
GAAGGCCGCGCTTCCCCTTCTCCACGAAGGAGACCAGATGAGCTTCAGCACCGGCGCG  
CCAGCACTCGAGATCCCCGTGTGCCAGCCTCTCCTCAAGGCCGTCGCCCCGCTGCCGCCG  
CCGCCCCGAGAGCAGCAGCAACAAGATGTTCTCCGATGGACAGTTGACGCACGTGCTC  
GACTCCGACTGTGCTCTCTCTTCTGTTCATCCCCGGCCA ACTCCTCCAGCGTCGACGTC  
AGCCGGATGGTCCGTCCAAGCGAGCACGTCCCCTCGGTCCCAGCCTGCAGTTCGGCACC  
TCCTCCTGGTTCGCTGCTCCAGGCCTCAAGCGGCGGCGGCCACCGGATTCGCCGCC  
ACCTTCCCCGGCGGCATGGACGGCGAGCAGCTCAACGCCGGCGGCGCGCTGGTCCCCGGC  
TCCAACGACAACGAGATGAACTGCCACGGGATCTTCCACGTCGGCGCCGATGGCTCCTCC  
GAGGGCACGTCGCCGTTCCCTCCGTTCTCATGGCAGTAG

>HORVU6Hr1G031450.6 cds sequence



ATGGAGTGGACGGCCCCGAAGTCCACCCCGTCTCCCCGCCCCACCTCCTCTGGGACTGG  
GGCGACGCCGCCGCGCTGGGCTCCTCCGGCGAGGCGGGGAGGCGCGGGAAGGAGAAG  
CGGGCCAGGGGGGAGGGGGCCGGCAGGAGGCGGAGGAGGGGGCGTAAGGTGCCAGGTG  
GAGGGCTGTGGGACCGAGCTCGCCGCCGGAAGGAGTACCACCGGAAGCACCGGGTCTGC  
GAGGCCACACCAAGTCCCCCGCGTCTGTCGTCGCCGCGCAGGAGCGCCGCTTCTGCCAG  
CAGTGCAGCCGGTTCCATGGGCTGTCCGAGTTCGACCAGAAGAAGAGGAGCTGCCGGAGG  
CGACTGTCTGATCACAATGCTCGGCGCCGGAAGCCACAGCCGGATGCATTCTCCTTTGCA  
CCGGCAAGGCTACCGTCTCATTGATGTTTGATGATAGACGACAAATAAGTTTTGTCTGG  
GATAAAGATCCACTTAGCCATGGAAGGCCTTTCCCATGTTCTCCATGGGACAGCCCATCT  
GACTTCAAGCCCCACAAGTGAAGGAAATAAGAGAAGTGTCAATCAATGGACAAGTTCAT  
TTTGATAAATCTCATCTACCCAATGCTGTTCCAGCACTGAGTCATGACATAGCTGAGCTG  
CTACCAATGAAAGGTCCGGACGCATCTGCAACCGCTTCGAAATTAGGTGGAGCACCGGAT  
CTTCAGCGTGCTCTCTCTTCTGTCTGAGCTAGTTCTTGTGGATTACCTGATCCAGTACAG  
CAAGCATCTTGTCTCGTCCAATTCAGTGGTGCCAGCCAAAACAGCCGGGGTCTGCCTTCA  
CCACATGGAGGGAGCCCTCCGTCGGCATCCTGTGCCGAGGGACAGCCCATGGCTCCATCA  
CCTCAGTTCGTCCGTTTCACGATGGATGGCGCCAGCAGTGGCTATGAATCCACTTTCTTC  
GGCGTAAACCGGATGAATTGA

>HORVU7Hr1G042370.8 cds sequence

ATGTCTAGTGGGCTCAAGAACAAGAAGAAGAAGGGCCACGAGTGGGATTTGAACGACTGG  
AGATGGGACGGCAACCTCTTCTGGCCGCACCGTCTGTCAAACGCGGAAGCGCCGTCGGGG  
TGCGGCAGCAGGGAGCTCGGGCGGGCTGAGGAAGGGGGCAGTTTTGGTGCTGCTGACAAG  
AGCAGGAGGAGGAGGAGAGTTCACCGTGGATAACCCCGAGGAGCCTCCACATGAA  
AGGATTGCTGTTCCGAGAGGACAGATCAGCGAAGAAGAGAGACCTGCGAATGCAACAGCA  
GGTGCATCTTCCAGCTCTGCTCCATCTTGCCTAGTCGACGGCTGCCACGCGGATCTCCGC  
GACGGTAGGGACTACCATAGGAGGCACAAGGTGTGTGAGGTGCACACCAAGTCGACTCTT  
GTTCTGATCAAAAACATAGAGCATCGGTTTTGCCAGCAGTGCAGCAGGTTTCACCTTGTT  
CAAGAATTTGATGAAGGGAAGAAGAGCTGCCGCTCACGTCTAGAAAAACATAATGGGAGG  
AGGAGGAAAGCCCAGGCCAGGCTGTGAGTTCTCGAGTGAAAATCAGTCCTTAACCAAT  
ACCTTACTCCTTCTACTGAGACAACCTCGCTGGACAAGATTCTGCTGCTAGCTCGTCTGAG  
CAAATCAATGGTCCGAATTTCTTGGTCAATCTTCTGAAGAACCCTTGCTGCTGTTGCTGGC  
ACACAGGCATGTCAAGATATGCTAAAGGATGCAACATCATCAAATGCTGGTAACTATGTT  
GGTAATCAAAGTGGACCACCAGTTCCTGCAGAAGAGCCTCCTATGAAAAGACGTGCGCGG  
AATTTTGAATGACACTTATGTCGAGGAAGATGAGNNNNNNNNNNNNNNNNNNNNNNNN  
NNNNNNNNNNNNNNNNNNNNNNNNNNNNNNNNNNNNNNNNNNNNNNNNNNNNNNNN  
NNNNNNNNNNNNNNNNNNNNNNNNNNNNNNNNNNNNNNNNNNNNNNNNNNNNNNNN  
AACTGGCTGTCACATTATCCAAGTGCATGGAGAGCTATATTAGGCCTGGTTGTGTAATT  
CTAACTATTTACCTTCGTCTTCCTAACTGGATGTGGCATAAGCTTAATGTCGATCCAGCT  
CCTTGGATAGAAAATCTTATTAGCATATCCACTCATGGTTTCTGGGAGACAGGATGGTTG  
TATGCTAGGGTGCAGGACCGCCTGACATTAAGCTGCAATGGCAGGCTTACGTTGGTGTGT  
CCATGGCTACCTGTAATAGGTGACAAGCATCAGATACTGTGTGTAACCTCCATTGCGGCT  
TCTTGTAAGTCGACGGCAAACCTTCTCAGTGAGAGGCTTCAACATAGCTCAACCAACCACA  
AAATTAATTTGTATATTTGGTGGGAAATATTTAGTCCAAGAAGCAACACAAAAACTACAA  
GATGATACTGCGGTTCAAGCAAGGGCCTCAATGTCTGGCCTTTTCTTGCTCCTTCCCTAGT  
ACAAGTGAAGGGGGTTCATAGAGGTTGAAGATTATGATCAGAGCAGCATTTTCATTTCCC  
TTCGTTGTCGCTGAAGAATCTATATGTTGTGAGATTCGAATGTTGGAGGAAAACTGAAT  
ATATTTGCATTTGCTAATGTCTTGGAAAGGAAGAAGATCTGATGGCTTCTCGCAGCCAA  
GCCTTGAAGTTTCTACATGAAATAGGGTGGCTTCTTCAACGGAGCCACTCACGAGCTACA  
TCATCCAAGGCTCCACAACAACATCGTGTGTGGGTTTTCTTGCTGCAAGATTTAGATGG  
CTCCTGTCCTTTGCGGTGATCAGGAATGGTGGCGCGTCTGTAAGATGCTGCTGGACACC  
TTGTTCCAGGGCAATATTGACGTCCCCTCACCGATTGAGTTTGTCTTGGGAGAGAGTTTA  
GTGTTCAAGGCTGTCAACAAGCGGTCCAAGCCCTTGGTTGACTGCCTATTGAGATACACA  
ACGAATTCTGCGCCAGTGGGCGGTGGAGCAGTGGCTACACCAGCTCGGTTCTGATTCACG  
CCTGACATGACTGGTCCATCAGATATTACACCTCTCCATAGTGCAGCTACCATCAGTAAT

GCTGCTGCTGTTTTGGATGCTCTAACTGATGATCCTCAACAGCTAGGGATCAAAGCCTGG  
AAGAATGCCCGCGATGCGACCGGGTACACTCCAGAGGATTACGCTCGGAGGAGAGGGCAC  
ACATCCTACATCCAGATGGTCCAGAACAAAATTAACAGGGGGTTACCTGCAGCCCATGTG  
TCTGTTTCCATGACCACCCTGGTATCACCGAAGAGCATGCAGATGCAGGTCGTCCGAAA  
TCAACTGATCAGACCATATTTGATGTGCGAGAAAAGCCTACCGGGATGCAGACAATGTGTC  
CAGCTCCAGCACATTGCCTACCGGCCCTGCCCAAACAGGTTCTTGTGGAACAGGCCTGCG  
GTGCTATCCTTGGTCGCCATTGCCACTGTCTGCGTCTGCGTAGGTTTGATAATGCAGAGC  
CCGCCGGTCGTCCGCGGTATGCCGGGTCTTTTTCTCTGGAATCGCCTCCGTTGGGGACCC  
ACTTGA

>HORVU5Hr1G073440.7 cds sequence

GCGGCGGGCGGCGGCAATGGAGACCGGGAGCAGCGGCGGGGAGAGGGCCCGGGGACGAC  
GTCCACGGGCTCCACTTCGGCAAGAAGATCTACTTCGAGCAGGACGTGGCCGGCGGGAGC  
GGCTCCTCCTCCTCCGCTCCGGTGGCAGGAGGGGCAGGGGCCCCGCTGGGCCAGGAGGA  
GGGGGAGGTGGTGGTGGCGGTGGCGGTGGCGGGCGGCGGAGGAGGAGGCCTCCACCCCC  
GCGGCCGGCGGCAGCGCCTCGCAGTCGCAGCAGCCGAGGTGCCAGGTGGAGGGGTGCGGC  
GTGGATCTGAGCGGGCGGCAAGACCTACTACTGCCGCCACAAGGTGTGCTCCATGCACTCC  
AAGGCGCCGCTCGTCGTCGTCGCCGGCATCGAGCAGCGCTTCTGCCAGCAGTGCAGCAGG  
TTCCACCAGCTACCTGAATTTGACCAAGGAAAACGAAGCTGCCGCCGACGCCTCGCGGGT  
CACAATGAGCGCCGGAGGAAGCCGCCGCCCGGACCTATGTGACACGCTATGGCCGGCTT  
GCTGCGTCCTTCAACGAAGATCCAGGCAGGTTTCAAGCTTTCTGCTGGATTTCTCGTAC  
CCGAGGGGCCCGGCGGCGTGAGGGACCCGTGGCCGGCCGTTTACGCCCGGCGACCACCGC  
ATGCCTGGCACCACCACTGGCAGGGCCAGGGCAGCCATCATGAACAACACCACGCTCAT  
CGCAGTGCAGTTGCGGGATACGGCGACCACCACGCGTACAACGGCCAGGGCAGCAGCTCG  
GGGGGAGGCGGGGCGCCGATGATCCCGGCGGGCTTCGAGCTCCCCTCGGACGAATGTATG  
GCGGGCGTCGCCGCGACTCCAGCTGTGCTCTCTCTTCTGTCAACTCAGCCATGGGAT  
AGTAGTGCCACAGCTCCAGCCACATCCGGTCCCCGGCAATGTGACGCGCCAGCGCCTTC  
CAGGGCAGCCCGGTGGCGCCCTCCGTTCATGGCCAGCAACTACATGGCGGCGGGCAGCAGC  
AGCGGCTCCTGGGGTAGCCCCGGGGCGCCAGGAGCATGCAGCAGCAGCACCACCACCAT  
CACATGCAGCATGACACGGTGTGAACGAGGTCCATCCGAGCTCGGTTTACCACGGGCAG  
TTCGGCGAGCTCGAGCTGGCGCTGCAGCAGGGGAGGGCCACGCCGAACCCGCCGCACGCC  
GAGCACGGGGCCTTCAGCCACTCCAGCAACGCGATGAACTGGTCTCTGTAG

>HORVU2Hr1G097610.1 cds sequence

ATGGAAGGAGACGGCGACGCTAGGTCGAGGGCGGGGCTGGCCTGGGATCTCGGGATGCAG  
CAGTGGGCGCCCGCCGCTCGGCTACTTACCCGCAGCATTTCTGCCGCCGCCGCCGCCG  
GGGGTGGCTAGCCACCACCGGGGGGGGGGGGGGGCTAGCCTAAAGCTGGGTAAGCGCCCC  
TGCTCGCTGGCCGGCGTCCAGGTGGCTCAGGTGGACGGCACCGGGGCTGCCGTGGTGGAA  
GGCAAGAGGAAGGAGAAGGCGGGCGCGCCGGCAACGGCGGCCATGCCAAGGTGCCAGGTG  
GAAGGGTGCCACATGGTGTGTCGGCGGGGGCCAAGGAGTACCACGGCGGCCACAAGGTGTG  
GAGGCGCACTCCAAGGCGCCAGGGTTCATCGTGCACGGCGCCGAGCAGCGCTTCTGCCAG  
CAGTGCAGCCGCTTCCACGCGATGGCGGAGTTCGACGACGCCAAGCGGAGCTGCCGCCGG  
CGCCTTGCCGGCCACAACGAGCGGGCGCCGGAAGAGCAACGCCAACGACGCCATGGCCAGG  
GGCACTGCGCACGCACACGGTAATCCATGTCATTACTCGCACACGTCCATCAGCGCGAAA  
TACTCCTGTTGA

>HORVU2Hr1G097580.1 cds sequence

ATGGAAGGAGACGGCGACGCTAGGTCGAGGGCGGGGCTGGCCTGGGATCTCGGGATGCAG  
CAGTGGGCGCCCGCCGCTCGGCTACTTACCCGCAGCATTTCTGCCGCCGCCGCCGCCG  
GGGGTGGCTAGCCACCACCAGCAGCAGCATATGCAGCAGGAGCTACTAGCCTA  
AAGCTGGGTAAGCGCCCCCTGCTCGCTGGCCGGCGTCCAGGTGGCTCAGGTGGACGGCACC  
GGGGCTGCCGTGGTGGAAAGGCAAGAGGAAGGAGAAGGCGGGCGCGCCGGCAACGGCGGCC  
ATGCCAAGGTGCCAGGTGGAAAGGGTGGCACATGGTGTGTCGGGGGGCCAAGGAGTACCAC  
CGGCGGCACAAGGTGTGCGAGGCGCACTCCAAGGCGCCAGGGTTCATCGTGCACGGCGCC  
GAGCAGCGCTTCTGCCAGCAGTGCAGCCGCTTCCACGCGATGGCGGAGTTCGACGACGCC

AAGCGGAGCTGCCGCCGGCGCCTTGCCGGCCACAACGAGCGGCGCCGGAAGAGCAACGCC  
AACGACGCCATGGCCAGGGGCACTGCGCACGCACACGGTAATCCATGTCACTACTCGCAC  
ACGTCCATCAGCGCGAAATACTCCTGTTGA

>HORVU6Hr1G030490.2 cds sequence

TCAAGGCACGCACAAGCACAACCCTTCTGTGCTGCAAAGATACATACACACCCGGCTTCT  
TGCTTCCTCACACATCAGTCAGGCCGAGCGTCACCCACCTTTCTCATCCGCGCGCGGGAC  
AGCCGGCCAATGATGAGCAGCAGGCTTAACGTCGGCACGATGGCACCCGGTTAGCGACGTG  
GTCGACTTCGGTTATGCTCCCATAACAGTCCTACCCCAACTTTGAGTCGGCCGGCCTGGCC  
TTGCCCGGTGACCGGCAGCCACCGTTCCAGCACCATCACCTCTACGATAGCTTCGACTTC  
ACCTCTGCTAACTTCTCGTTTCAAGACCCGGCCGCGCTCTTCTCCGGCGACTCGGCGCTC  
AGCAACCAGCTCCAGCAGCCCTTCGTCCAGTCGCAGGTCACCATGCCGACGACGGCGTCC  
TCGTCCGGTGCTGCAAATGCCGATGATGACGCTGCCGGGCATGCTGATGTCTTCCTCCTCG  
TCGCTGGCGGGCGGACGCATGCACCTTCGGTGGCGGTGGAGGGTTCTGAAGCGGGAGGAC  
GGCGGGCCCTTCTCGGACATCGGCGGTGGCGGGAGGATCGGGCTGAACCTCGGCCGCAGG  
ACATACTTTTCCCCGGCGGACGTGCTGGCCGTGGACCGCCTGCTGATGCGCTCCCGCTTC  
GGCGGAGCTGGCCCAATGGGTATGCTGGGGCTGGGGCTCGGGCGCCGCCGCCACCACCAC  
CAGCCCCCGCGGTGCCAGGCCGAGGGCTGCAAGACTGATCTCTCCGCTGCCAAGCACTAC  
CACCGCCGCCACAAGGTCTGCGAGTACCACGCCAAGGCCGCCACCGTTCGCAGCCTCCGGC  
AAGCAGCAGCGCTTCTGCCAACAATGCAGCCGGTACGTTGTGCTCGCTGAGTTTGACGAG  
GCCAAGAGGAGCTGCCGGAAGCGGCTCACAGAGCACAACCGGGCGCCGCAGAAAGCCCGCC  
GGCGCGCAGGCAGGCAAGGACTCGCCGGCGCCCCCTACCAAGAAGCCAGACGGTAGCATC  
ACCAGCTCATAACCCGGTGATCACAGGACGAACAAGTCGACGACGGCGGGCGGCCTTCTCG  
CCGAGCGCCAGCAGCTTCAGCTGCTTTCAGCAGCAGCAGCATGCGCTCGACAACGGCGGC  
CAGTCGAACAACGCCACGCCAACGTCGGCGCCTCCGACGCTGTCCCTGGCGGGCGCCACCA  
TCGCCGCCTCAGCAGAACGACGGCGACTTCGGCTCCGGCCTTGACACCATGCTGCAGATG  
CAGCCGCAAGAGGCCGATGAGCAGGGGGAACAGCAGCAGCATCTCATGATGACCTCGCTC  
GTGCAGTCGCAGCGGCAGCAGCAGCACCGCAGCAGCGGGAACATCTTATCTTGCTCAACG  
ACGTCGGCGTCCGATCAGCGTCACCACCACAACAACGGCGGCAGCTGCTGCAACGACAAC  
AGCATGCAGCATTTCTTCGAGGTGGACTTCATGTAG

>HORVU6Hr1G019700.3 cds sequence

ATGATAAGTAGATACTACCAGCAGTGCATCATCTTTGTTGTCAGCAGCTTTGACACACAA  
GTAGGAGGAGGAGCGGCCGCGGAGATCTTGGGCTCTGGCATGGGCTCGTTTGGGATGGAG  
TGGAACCAGAGGAGCTCCGTGCTGTGGGACTGGGAGAATTTCCCGCCGATAGGCGGGCGAC  
AACCCCAAGAATGCGATGCAGGCCGAGCCAAGATTCGCTGCCGTTGCGGCTGCCATGGGG  
AATGAACCGCTCAATTCTTCTGGCGGCAGCGGCACCTTCTCTTCCAGCTCGGAGATGGGG  
TATGGCTCCTCCAAGAGCTCCATATCCGCGTCGATCGATTCTTCGTCCAAGGCTGGGAGC  
AACATGGAGTTCAGATTTGCGCCCGTCAAAAACCCTGACAGGAACACGAGCGAAAACACT  
GAGTTGGGTAAAGTTGACAACACGAGGACTGGAACGTCTCCGTCTGTGTTGGTGGCAGTG  
AGCAGTGGAGAGCCGGTGATCGGCCTGAAGCTCGGCAAGAGAACCTACTTTGAGGATGTC  
TGTGGAGGGCAGAGTGTCAAGAGCTCGCCATCGGGTGTGCGAGTGTGCCGAACAAATCT  
CCTGCTTTGAGCAAGAAGGCAAAGGCGGAACAACAGAAGGCACATAACTCATACTGTCAG  
GTTGAAGGCTGCAAGGTTGATCTCTCTTCTGTTAAAGAGTACCATCGAAAGCATAGAGTA  
TGTGAACTTCACTCTAAGGCTCCCAAAGTTGTTGTCGCTGGTCTGGAGCGGCGCTTTTGC  
CAACAGTGCAGCCGGTTTCATGCTTTGTCTGAGTTTGACCAGAAAAAGCGAAGCTGCCGT  
AGGCGTCTCAATGATCATAATTCCCGCAGGCGGAAGCCACAGCCAGAAGCAATTTCTTC  
AGTTCGTCAAGGATGTCTACGATGTTTTATGATGCAAGGCAACAGCCAAATTTCTATTC  
GGTCAGGCTCCATATGTTCAAATGAGAAGCTGTGGAAGTTCTTCATGGGATGAACCAGGA  
GGCTTCAAAGTTACACACACAAAAGCTCCTTGGTTAAAGCCAACAACACTGCTGCAGGTGTT  
GATGGGATGCATTTATCTAGTCAGCAGATGTCGGACAATGTTATGCCGCATGGTGCACAT  
CATGGTTTTCGATGGGTTTCATGGCATTCAAGGGAACCTTACAAAGTTCCCTAATCAAGGT  
GTCCAAGCTTCCGCTGTCGCCCCCAACTCCAGTGGCGCCCCGGATCTTCAGCATGCTCTC  
TCTCTTCTGTCAAGCAACCCAGTGGGTGCTGCCAACCTCCAGCCAACCTCCAGATGCAC

TCTGGGGTGGCTGCCATTGCCGGCACCCCAACCCCGCGATGCACGTGCTGGGATCATCG  
GCAGGGCTCTGGCTAGACGGCGGGCCACCCTAGATGATCACCCGCGGTTCCAGGTCTTC  
GAGCGCTTGGGGGACCACGACAGCGAGCTCCAGCTCCCAAAGCCTTCCTACGACCACGCC  
TCGCACTTCGACCGGATGCACTGA

>HORVU2Hr1G048280.2 cds sequence

CCCTCCGCTTCTTCTCCTTCTCCTTCCACTCATCAGCTAGCTCCACAGTTCCACTTCTGC  
GACAGCTCCCCGAGAAGAGCCCTAGCTAGCTTCGTCTTCATCGCGCCTCACCGGAAGGCA  
TGGACCGCAAGGACAAGTCTCGCAAGTCCCCCTCAGCAGCGTCCATGGCAGCGCTCGCCG  
CGGCAGCTGNNNNNNNNNNNNNNNNNNNNNNNNNNNNNNNNNNNNNNNNNNNNNNNNNNNN  
NNNNNNNNNNNNNNNNNNNNNNNNNNNNNNNNNNNNNNNNNNNNNNNNNNNNNNNNNNNN  
GCGAAGCGGTACCACCGCAGGCACAAGGTGTGCGAGGCGCACTCAAAGGCTGCTGTCGTG  
GTCGTGCGCCGGTCTGCGCCAGCGCTTTTGTGCAATGCAGCCGGTTCACGAGCTTCTG  
GAGTTCGACGACAAAAGCGCAGCTGCCGCCGGCGCCTGGCCGGGCACAACGAGCGGGCG  
AGGAAGAGCTCGGCTGAGNNGAACGGCGGGCAGCGGTGCCGCCACGCCGACCAGGACGGC  
CGTAGCCACCCTGGGAACCCGCCGCTGAACCATTTCCAGATCAGATAA

>HORVU3Hr1G094730.1 cds sequence

GAATTCTCTGGACACAGAGACGTGCGTGCGTGCGCGTGTATTTGGCATGGATTCTTGG  
GAGCCCAAGATGCCTTCTTGGGACCTCGGCACGGTGGTTCGCGCCCAGCGGGCGGGGGGA  
GGAGGAGGCGGGCGGGCGGCTGGACCTGAAGCTCGGCGCGCCGACGAGCTGGAGGCCG  
GTCCCGGCGCCGGTGTATCGGTGCAGCAGCAGCAGCAGCAGCAGCAGCCGCCTTCCGCGGCG  
ACGGCGAAGCGTGCCCGGGCGGGGCAGGGGCAGCAGACGGTGCCGGCGTGCTCCGTGGAG  
GGGTGCACGGCCGACCTGTCCCGGTGCCGCGAGTACCACCGCCGGCACAAGGTCTGCGAG  
GCGCACTCCAAGACGCCCGTCTGTCGCCGTGCCCGGCCAGCAGCAGCGCTTCTGCCAGCAG  
TGCAGCAGGTTCCATTTGCTCGGGGAGTTCGACGAGGTGAAGAGGAGCTGCAGGAAGCGG  
CTCGACGGCCACAACCGGCGCCGCGGAAGCCGACGCCGATCCCCTCAACCCTGCCGGC  
CTGTTGCTAATCACCACGGAGTGCCAAGATTTGCGTCTGACCCGCAGATCTTCTCCCCG  
ACGTCCATGGCGGAGCCCAAGTGGCCAGGCGGCATCGCCGTGAAGACGGAGGCCGACGCG  
TTCCACGAGCAGTACTACTCCTTCAACGGCGCCGCCTCCCTCTTCCACCACGGCAAGCCG  
GAGAGGAAGCACTTCCCCTTCTGACCGACGGCGGGCAGCCACGTTCCGGCTGCCAGCCG  
CCGGCGTTCACCATCACCCCTTCTCGGAGAGCAGCAGCAACAGCAGCCGGCACAGCAAC  
GGCAAGACCACCATGTTGCCCCACGACGGGGGCCCGGACCACAACACTGTGCTCTCTCTCT  
CTGTCAGACAACCCGGCGCCGGCGCACATCATGAACCCCGCGGAGGCGCATCATCTCGGT  
GGCGGGCGGGCGGTGACCATAACAGTACGGCGGTGGAGGGCGGGCAAGGTGGCGCGGCTG  
CACAACAACGGCGACGTCTCGCTACCCGGGCTGTCTTACGTGAGCCTGGGTGACAAGGGC  
GCGCCCATGTTGTTGCACACGTCTAACAGATCACAACACGCCGCTGCTACCGCTACCACT  
GCCGTTACTACAAGCACAGCTCCAGCTCCGACGGCGTGCAGATGCAGCAGTACCATGGC  
TACTACCACCACCAACCAAGTGGGGCGTGCATCAGGGGAACCACCAGGATGCTGGTGGG  
ATGCATGCCCTTCCCTTCTCGTCATGGTAG

>HORVU7Hr1G110980.3 cds sequence

ACTTCACTCTCTCCTTGGCCGGCCGGCTCCCTTTTTTAACCACCTCTGCGCCCTCCAC  
CACCTTACACAGCACAGCACAACCACACTCATTCACCACCCAGCGAGCTCATCACAACCA  
CACGCGCCTTCTCCCAGTCCCAGCTACTCGGGCCGGCCATGATGAGCGGCGGCAGGATG  
AACGGCCCCGGCGAGCGACACTTCCCGTTCGGGGCAATGCAGCCGCCGCCCTACGTCCGC  
TTCGAGCACGCCGGCGGAGGAGGTGGCCAGCGCCATCAGGGCGCGATGATGTACGACAAC  
TTCGACTTCGCGGTTCGCGGGCGGCCCTTCGGCCAGTTCAGGACGCGCCGCACCACAG  
ATGCTGGCGATGCCGCCGAACGGGAGCGGAGCAGGGCGGGCTGGTCCCCATGGCGCCGCCG  
CCCATGCCATGCCCGGGATGCAGCTGCAGATGCCGCCATGCCCCACGGTATGCACGGC  
CACGGCGACGTGTGCCCGTGCATGGGGATGGTGAAGCGCGAGGGCGGGCGCCGGGGACGCG  
GGGAGGATCGGTCTGAACCTCGGCCGGCGGACCTACTTCTCCCCGGAGACATGATGGCC  
GTGGACCGGGTGTGATGCGGTCCCGTCTCGGGCGGCGTGTTCGGGCTGGGATTCGGCCGC  
GCCACCAGCAGGCGCCCCGGTGCCAGGTGGAGGACTGCAAGGCGGACCTTCCGGCGCC  
AAGCACTACCACCGGCGCCACAAGGTCTGCGAGTACCACGCCAAGGCCGCCCTCGTCTCC

ACCGCCGGCAAGCAGCAGCGCTTCTGCCAGCAATGCAGCAGGTCACACGTGCTCATGGAG  
TTCGACGAGGCGAAGCGGAGCTGCCGGAGGCGGCTCGCAGAGCACAAACCGTCCGGGAGG  
AAGCCGGCGGCCGGCAGCACGGCGACGTCGTCGAAAGACTCGGCCGCCGCTTCCAAGAAA  
CCCAACGCCGGCGCCATCTGCAGCTCCTACACCGGCGACAACAGCAGTTTGAGCGCGACG  
AAATCGACCATCTCCTCCAACACGAGCGCGATCAGCTGCCTCCAGCTGCAGGGGCCAGGCC  
AGGGCGGCAGCTGCGGGCAGGGCCGACGGCGCTCACCTCGGTGCGCCGCCGGAGAAGGAC  
GACCAGCAGCAGCAGTTCAGGAACGCCATGCAGCTCCACCACCATCAGGAGCACCAGCAC  
TTCATCACCTCCCTCCTGCACGGCAACATCAATAACAGCAACATCCTGTCGTGTTCTCG  
GTGAGCTCCAACACGATGCCATCGGCGGTGGCGGCCAACGGCGAGGACGACAACAACAAC  
ATGCATATGTTTGAGGTGGACTTCATGTAG

>HORVU5Hr1G117190.5 cds sequence

ATGGACTTGGAGGCGGCCAGGGTAGGGTCGCAGAGCCGCCACCTGTACGGAGGCGGGCTG  
GGTGGCGAGCTTGAGCAGGCCAGGGCGGAGAAGCGGGTGTTCGGCTGGGACCTCAACGAC  
TGGAGCTGGGACAGCGAGCGCTTTGTGCCACGCCGGTGCCCGCGGCAGCGGGGAATGGA  
CTGTGCTCAACAGTTCGCCGTCTTCTCCGAGGAAGCCGGGCCTGAGGTGGCTAGGAAT  
GGTAACGTTAGAGTTGACTCTGATAAGAGGAAGCGAGTGGTTGTCATTCATGATGATGAC  
AATGAGAAGGATGATGACCCAGTGGGGAACAGTAGCAATGTGCTCAGCTTGAGACTTGGC  
GGCGGCAACTCTGTTGCCGGCGGAGCGGCGGAGGATGGCGGCGTGAACGAGGAGGACAGA  
AATGGTAAGAGGATCAGGGTGCAGGGCGGAAGCTCAAACGGTCCGGCGTGTGAGGTGGAG  
GGCTGCTGCGCTGACCTTAGCGCGGCAAAGGATTACCATCGGCGGCACAAGGTCTGCGAG  
ATGCATGCTAAGGCCAACACTGCGGTGGTTCGGAATAACCGTCCAGCGGTTCTGCCAGCAA  
TGCAGCAGATTTACCTTCTTCAAGAATTTGATGAAGGAAAGCGAAGTTGTGCGCCGGCGT  
TTAGCAGGCCATAATAACGTAGGAGGAAAACCCGCCCTGAAAGTGCTGTTGGTGGGGCT  
CCTATTGAGGAAAAGTTAGCAGTTATTTATTGTTGAGTCTTCTTGAATATGCGCCAAT  
TTTAACTCTGACAATGCTGAGCGTGTACAAGGTCAGGAGTTGCTATCCAATCTTTGGAGA  
AACTTGGGGACTGTTGCAAATCATTGGATCCAAAAGAACTCTGTAAACTCCTGGAGGCG  
TGTCAGAACATGCAAATGGATCAAATGCTGGGACCTCGGAAGCAGCTAATGCTTTGGTG  
AATACTGCTGCAGCAGAGGCTGCAGGACCATCTAACTCTAAGGCGCCTTTTGCGAATGGT  
GGTCAATGTGGGCAGTCGTCATCTGCTGTTGTACCAGTACAATCAAATGTTCCCATGGTG  
GCAACTACCGAGATTCCAGCATGCAAGTTAAAGAATTTTGATTTGAATGACACTTGCAAC  
GATATGGAAGGCTTTGAGGATGGTTCGAATTGCCATCATGGATACGTCAAGATTCTACT  
CAAAGCCCACCACAGACTAGTGGTAATTCGGATTCAACATCAGCTCAGTCACTGTCAAGC  
TCAAATGGAGATGCTCAGTGTGCGACTGATAAAATTGTATTCAAGCTTTTTGAGAAAGTT  
CCTAGTGAATTACCTCCAATTTTGCATCACAGATCCTTGGTTGGTTGTCCAGTAGCCCT  
ACTGATATAGAGAGCTATATCAGACCTGGCTGTATTATCTTGACAGTTTATCTTCGTTA  
GTTGAGTCTTCATGGAGAGAACTCTCTGAGAATATGAGTGTATATCTGGATAAGCTCTCA  
AGTAGTTCTGCTGATAACTTTTGGACATCTGGTTTGGTATTTGTGATGGTACAACATCAA  
ATTGCTTTTATGCACAATGGTCAAGTTATGTTGGACAAACCACTGGCACCTAATTCTCAC  
CATTACTGCAAGGTTTTATGTGTTAGTCCGGTTGCTGCTCCTTTTTTCAGCAACAGTTAAT  
TTCAGGGTAGAAGGCTTCAACCTAGTCAGTTCTTCCCTCGAGGCTAATTTGCTCAATTGAA  
GGGCGTTCTATATTCGAAGAAGACACAGCTATCATGGCTGATGATACCGAGGATGAAGAT  
ATTGAATATCTCAACTTCTGTTGTTCTCTCCCTGATACAAGAGGAAGAGGATTCATAGAG  
GTTGAAGATAGTGGATTTAGTAATGGTTTCTTCCCCTTCATAGTTGCTGAGCAGAATGTG  
TGCTCTGAGGTTTGTGAGCTGGAGGGCATATTTAAGTCATCCAGTCATGAGCAGGCAGAC  
AATGACAATGTCATGAATCAAGCTTTAGAGTTTCTACATGAGCTGGGGTGGCTTCTTCAT  
AGAGTTAACATAATTTCTAAGCATGATAAAGCGGAGCTGCCTGTAGCGGCCTTTAACCTG  
TTGAGATTCAGGAATCTTGGTATATTTGCGATGGAGCGGGAGTGGTGTGCTGTGACCAA  
ATGCTGTTAGATTTGTTATTTGATGGATTTGTTGATGCTGGGTTGCAGTCTCCCAAAGAG  
GTGGTATTGTCAGAAAATTTGTTACACTCTGCTGTGCGAGGAACTCTGCCCGAATGGTT  
AAATTTCTGCTGACATAAAGCCGAACAGAGGCCTGAATGAAACTGCAGAGACATACCTA  
TTCAGACCTGATGCTCGGGGCCCTTCTGCATTTACACCCCTACATATAGCAGCCGCTACT  
AGTGATGCAGAGGATGTATTGGATGCATTGACTGATGACCCTGGACTGGTGGGACTGAAC

GCATGGAGAAATGCGCGAGACGAGACAGGCTTTACCCCTGAAGACTATGCTCGCCAAAGA  
GGCAACGATGCTTACATCAATCTGGTCCAGATGAAGATTGACAGGCATCTTGGCAAAGGT  
CATGTTGTCTTGGTGTTCAGCAGCATGTGCCCTGCAATTACCGATGGGGTGAAGGCA  
GGTGATATCAGCCTGGAGATCTGCAAAGCCATGCCAGTGACAACAACATCCGCCGCAAGG  
TGCAACATTTGCAGTCGTGAGGCTAAGATGTACCCAAGTTCCTTTGCGAGGACCTTCCTG  
TACAGGCCGGCAATGTTACCGTGATGGGCGTCGCCGTGATCTGTGTTTTCGTCGGGATC  
CTCCTCCATACCCTCCCCAAGGTTTATGCCGCACCAAATTCAGATGGGAGCTGTTAGAG  
CGCGGAGCCATGTGA

>HORVU1Hr1G060770.1 cds sequence

GCTCTCCGTCACGGCGTCACGCCGTACCAACCGCACGCGGCACGCCGAACCTCGAGGGCC  
CACGCGCCAGCAGTAGCGGACTGGCCCCGGCCGCCCTACGCCGCTCACCTACCATTACC  
AAAGCCTTTCCTTCTCCTCCCGCGACGAGACGACCAATTCGCCCGCCCTCGTCGCGTCG  
CCGGCCGCTTCTCCCCCTCCCCACCACGCCCGACGCCTCCGCGGAACCGCGAACGAGA  
CCCAGCGTAGCGAGAGCCGATTGGGTTCGCGCGCGCGCGCCGGGTTTTTGGGGCTAGGGCT  
TGGCTCGTGGTTCGCGGTTTCCAGTTCAGGAAATGGACGCCTCCGACTCCGGCGGGGGC  
GGCGCGGGCGCCGATGCGGGGGAACCCGTCTGGGACTGGGACAACCTCCTCGACTTCGCC  
ATCCCGGATGACGATTCCCTGCTCCTCCCGTGGGATGACCCACTCGGGATCGAGGGCGAT  
CCCACCACCGAGACGGCGCTGCTCCCTGCCCGCCTCCGCCGACCCAGTGGAGCCGGCG  
CCTGCGCCACCGTCTCCATCTGTTGAGGCCGGGGCAAGCAGACGCGGGCGTCAGAAAGCGC  
GACCCGCGGGTGGTGTGCCCTAACTACCTCGCGGGGATTGTGCCCTGTGCGTGCCCCGAG  
TTGGATGAGATGGCGGCCGCCGCGGAGGTCGAGGAGGTTGCCGCGGAGGTGCTTGCCGGT  
CCGAGGAAGAAGCCCAAGGCCGCCAGCCGGGGTAGCAGCGGGGCGGTAGTCAAACTGGT  
GGTGGTGGCAGTGGCAGTGGAGTGGCTGCCCGTGGGGGAGCAGCAGAAATGAGGTGCCAA  
GTGCCGGGCTGTGAGGCGGATATACGGGAGCTGAAAGGGTACCACAAGCGGCACCGGGTG  
TGTCTGCGTTGCGCGCACGCGTCTGCCGTCATGCTCGATGGCGTCCAGAAGCGCTACTGC  
CAGCAGTGCGGCAAGTAA

>HORVU0Hr1G039150.3 CDS sequence

GGTGGGTACAGCTCGAGCCAGCTCCCTGGCGCTCCTCCCCCGTCCAGCCACGCCACCATCGCTG  
CCCACAGCCCCACGACATCCTCCAGTTCTACC  
ACCACCCACCTCGCACCACTACCTCGCCGCCGCCGCGGCAGGAGGCAACGGCAGCCCCTACGGCC  
AATTCGGCGGGGGCGGCGGGCGGGCGGGCGGGCTT  
CCAGTCTTACTACCACAGCAGCCGGGGACGGGCGCGCCCGAGTACTACTTCCCCACCTTGGTCAGC  
TCGGCGGAGGAGAACATGGCGAGCTTCGCGGCC  
ACGCAGCTGGGGTCAACCTCGGTTACCGGACCTACTTCCCGCCAGAGGCGGGCTACACCTACGGC  
CATCACCCGCCCGGTGCCAGGCCGAGGGCTGTA  
AGGCCGACCTCTCGGGTGCCAAGCGCTACCACCGCCGCCACAAGGTCTGCGAGCACCACTCCAAGG  
CGCCCGTTCGTCGTCACCGCCGGCGGCCTCCACCA  
GAGGTTCTGCCAGCAGTGCAGCAGATTCCATCTGCTTGATGAGTTCGACGACGCGAAGAAGAGCTG  
CAGGAAGCGCCTCGCAGACCACAACCGCCGTCGA  
AGGAAGTCAAAGCCGTCCGACGCCGATGCCGCTGATAAAAGGAGGACACAGGCCAGCAAAGCAGC  
AGCAAGTACCAAAGGCAAAGCAGCCGGAAGCAGCA  
GCAAGAGCACCGGCACCGGAGACGGGATGGACATTCAGGTGCAGCTGGGGAGCGGAGACCTGTCC  
AAAGATCAGGACGAAACCATGGGGCAGGGAGAGGT  
GGTGAAAGAAATGCAGGTGGATCCCAAGGGGAAAGCGTCAATGCAGCTGCAGCAGCAGCAACAGC  
AAGGACACCACGTCCATGGTCTTCACCTGCAGAGC  
CAACATGGCTTCCCTTTCCCTTCGACCTCTGCAGGCTCGTGCTTCCCTCAGAGCCAAGCTGTCTCGAG  
CACTGACAACACATCAAATATCGGCCAAGTGC  
AGCAAGAACAGCTAGGCTTGGGGTTCATCAGCACAGCAACATCCTTCAGCTGGGACAGGCCATGT  
TTGATCTCGACTTCGATCACTAG

>HORVU7Hr1G110950.1 CDS sequence

GGGAGGATCGGTCTGAACCTCGGCCGGCGGACCTACTTCTCCCCGGGCGACATGATGGCCGTGGAC  
CGGCTCCTGATGCGGTCCCGCCTGGGCGGGCGTGT

TCGGGCTCGGGTTCGGCGGGCGCCACCACCAGCCGCCGCGCTGCCAGGCCGAGGGCTGCAAGGCCG  
ACCTCTCCGGCGCCAAGCACTACCACCGGCGCCA  
CAAGGTGTGCGAGTACCACGCCAAGGCGTCCCTCGTCGCCGCCAACGGCAAGCAGCAGCGCTTCTG  
CCAGCAATGCAGCAGGTCAGAGCCAGACCCTCCC  
TCTCTCTCTCTCTCCCTCCGTAGAAATGGAACAGTAG

Table S2. Amino acid sequences of 17 barley SPL genes.

>HvSPL18

MDWDLKMPPGA WDLADLES DAAPAPAGG IANAEC SVDLKLGGLGECGAAPDTRGLGKAPA  
EAAASPSAAKRPRASSGGGAGQHQCPCSAVDGCRADLSRCRDYHRRHKVCEAHSKTPVV  
TVAGREMRFCQQCSR FHLLTEFDEAKRSCRKRLDGHNR RRRRKPQPDPMNSASFMTSQQAF  
LRNPGTRFPSFPTPRPEQNWP GIIKTEENPY YTHQLPLGISNRHHFGGSTSTFAKEGRRF  
PFLQEGEINFATGVALEPAVCQPLLKTVAPPESSSSSSKMFSDGLTPVLDSDCALSLLSA  
PANSSGIDVGMVQQTEHIPIAQPLFSNLQQFSSSSWFSRTQASTGTVSATGFSCPVVEN  
EQLNNVLTSDNNDLNYNGIFHVGGEGSSDGAPPSLPFPWQ

>HvSPL15

MQREVG PQVASPLYLHQIQPLPPHAAAARKRGTWPWAADPPENAAMGAGAAAGGNWNPS  
MWDWDSRAFTARPSSDALRLGGGLNHHQH HHHQPPPPPPATAAEAQRQGRGGAGDLSLQ  
LNLREEASMAMDVSP TTTMSSSPSPPARTSQEQ AARPSKRVRSGSPGTASGGGGGGGAGG  
SASGGGSYPMCQVDDCRADLTS AKDYHRRHKVCEIHSKTTKAVVANQMQRFCQQCSR FHP  
LSEFDEGKRSCRRLAGHNRRRRKTQPTDVASQLL LPENQENTANRTQDIVNLITVIARL  
QGGNVGKLP SIPPDPKDNLVQIISKINSINNANSLGKSPPSE AIDLNASHGQQQDSPVQ  
NATKVVDKQTV PSTMDLLTVLSGALGTSTPETNTS QSQGS SDSSGNNKSKSHSTEPACVV  
NSHEKSIRPFPAAGVIRS NSTHGSPPEIYKQPDRDTHPYLSLQLFGNAEVDIPVKMDTAN  
KYLSSSESNPMDERSPSSSPVTRTFFPTRSVNEGIRHPRIADYGEDAATAEISTTRA WC  
APQLELFKDSERPTENGSPNP TYQSCYASTSGSDHSPSTNSSDGQDRTGKIIFKLFGE  
PGSIPGNLRDEVVNWLKHSPTMEGYIRPGCLVLSMYLSMPTIAWDELEENFLQRVNSLV  
QASDLDFWRKGRFLVRSDNQLVSYKDG MTRLKSWRTWNTPELTLVTPIAVVGGRKTSLV  
LKGRNLTIPGTQIHCTSGGKYISKEVLCSA YPGTIYDDSGVETFDLPGEPNLTLGRCFIE  
VENRFRGNSFPVIFASKSICHEL RNLEAELEDSRFPDVSSDDQVHDARRLKPRDQVLHFL  
NELGWLFQAAACTPSIESDVSDSELIQFSTARFRHLLLFSNERDWCSLTKTLLEVLSKR  
SLVSEELSQETLEMLSEIHLLNRAVKRKSSHMVHLLVQFVVICPDNSKLYPFLPNYPGPG  
GLTPLHLAASIDDAEDIVDAL TDDPQQIGLSCWHSVLDDDEGISPEVYAKFRNNGSYNELV  
ARKLVDRKNSQVTIVLNKGEIHMDQ PENAGANNSSGIQALEIRSCSQCAILESGLLRPM  
RSRGLLARPYIHSMLAIAAVCV CVCFMRALLRFNSGRTFKWERLDFGPT

>HvSPL16

IFHVIYVTIHRIFIVSFWV LFAFHFCYFAYXXX CFLWCSSIFIGICSFYVXXXXXXXXXX  
XXXXXXXXXXXXXXXXXXXXXXXXX SCAVDGCKADLSKCRDYHRRHKVCEAHSKTPLVVVA  
GREMRFCQQCSR FHMLAEFDEAKRSCRKRLDGHNR RRRRKPQVDSMNSGSMFTTQQGTRFA  
SFSAPRPEPSWSGIKSEDSNPFYSTH QVNF GGATSSYSKEGRRFPFLHEGDQMSFSTGA  
PALEIPVCQPLLKAVAPLPPPESSSSNKMFSDGQLTHVLDSDCALSLLSSPANSSSV DV  
SRMVRPSEHVPSVPSLQFGTSSWFACSQASSGGGATGFAATFPGGMDGEQLNAGGALVPG  
SNDNEMNCHGIFHV GADGSSEGTSPSLPFSWQ

>HvSPL11

MEWTAPKSTPSSPHLLWDWGDAAALGSSG EAAAGRRGKEKRARGEGAGGGGGGGGVRCQV  
EGCGTELA AAKKEYHRKHRVCEAHTKSPRVV VAGQERRFCQQCSR FHGLSEFDQKKRSCR  
RLSDHNARRRKPQPD AFSFAPARLPSSLMFDDRRQISFVWDKDPLSHGRPFPCSPWDSPS  
DFKPPQVKEIREVSINGQVHFDKSHLPNAV PALSHDIAELLPMKGP DASATASKLGGAPD  
LQRALSLLSASSCGLPDPVQQASCLVQFTGASQNSRGLPSPHGGSPPSASCAEQPMAPS  
PQFVRFTMDGASSGYESTFFGVNRMN

>HvSPL1

MSSGLKNKKKKGHEWDLNDWRWDGNLFLA APSSNAEAPSGCGSRELGRAEEGGSFGAADK  
SRRRRRVSTVDNPEEPHERIAVRRGQISEEER PANATAGASSSSAPSCLVDGCHADLR  
DGRDYHRRHKVCEVHTKSTLVRIK NIEHRFCQQCSR FHLVQEFDEGKKSCR SRLEKHNGR  
RRKAQAQAVSSSENQSLTNTLLLLL RQLAGQDSAASSSEQINGPNFLVNLLKNLAAVAG  
TQACQDMLKDATSSNAGNYVGNQSGPPVPAE EPPMKRRARNFDLNDTYVEEDEXXXXXX  
XXXXXXXXXXXXTDLRTQVLNWL SHYPSDMESYIRPGCVILTIYLR LPNWMWHKLNVDPA  
PWIENTLISITHGFWETGWLYARVQDRLT LSCNGRLTLVCPWLPVIGDKHQILCVTPIAA



SCKSTANFSVRGFNIAQPTTKLLCIFGGKYLVEATQKLQDDTAVQQGPQCLAFSCSFPS  
TSGRGFIEVEDYDQSSISFPFVVAEESICCEIRMLEEKLNIFAFANVLEGREDLMASRSQ  
ALKFLHEIGWLLQRSHSRATSSKAPQQHRVVGFLAARFRWLLSFAVDQEWCGVVKMLLDT  
LFQGNIDVPSVFEVFLGESLVFKA VNKRSKPLVDCLLRYTTNSAPVGGGAVATPARFVFT  
PDMTGPSDITPLHSAATISNA AAVLDALTD DPQQ LGIKAWKNARDATGYTPEDYARRRGH  
TSYIQMVQNKINRGLPAAHVS VSM TTTGITEEHADAGRPKSTDQTIFDVEKSLPGCRQCV  
QLQHIAYRPCPNRFLSNRP AVLSLVAIATVCVCVGLIMQSPVVRGMPGPFLWNRLRWGP  
T

>HvSPL17

AAAAAMETGSSGGGRGPGDDVHGLHFGKKIYFEQDVAGGSGSSSSASGGRRRGRGPAGPGG  
GGGGGGGGGGGGGGGGGASTPAAGGSASQSQQPRCQVEGCGVDLSGGKTY YCRHKVCSMHS  
KAPLVVVAGIEQRFCQQCSR FHQLPEFDQGKRSCRRLAGHNERRRKPPP GPMSTRYGR L  
AASFNEDPGRFRSFLDFSYPRAPAGVRDPWPAVQPGDHRMPGTTHWQGGQSHHEQHHAH  
RSAVAGYGDHHA YNGQSSSSGGGAPMIPAGFELPSDECMAGVAADSSCALSLSTQPWD  
SSA HSSSHIRSPAMSTASAFQGSVPVMSMASNYMAAASSSGSWGSPRGARSMQQQH HHH  
HMQHDTV MNEVHPSSVHHGQFGELELALQQGRATPNPPHAEHGAFSHSSNAMNWSL

>HvSPL7A

MEGDGDARSAGLAWDLGMQQWAPAASATYPQHFLPPPPGVASHHRGGGGASLKLKGRP  
CSLAGVQVAQVDGTGA AVVEGKRKEKAGAPATAAMPRCQVEGCHMVLAGAKEYHRRHKVC  
EAH SKAPRVIVHGAEQRFCQQCSR FHAMA EFD DAKRSCRRLAGHNERRRKS NANDAMAR  
GTAHAHGNPCHYSHTSISAKYSC

>HvSPL7

MEGDGDARSAGLAWDLGMQQWAPAASATYPQHFLPPPPGVASHHHQQQQHMQQELTSL  
KLGKRPCSLAGVQVAQVDGTGA AVVEGKRKEKAGAPATAAMPRCQVEGCHMVLAGAKEYH  
RRHKVCEAH SKAPRVIVHGAEQRFCQQCSR FHAMA EFD DAKRSCRRLAGHNERRRKSNA  
NDAMARGTAHAHGNPCHYSHTSISAKYSC

>HvSPL21

SRHAQAQPFC AAKIHTHPASCFLTHQSGRASPTFLIRARDSRPMMSSRLNVGTMAPVSDV  
VDFGYAPIQSYPNFESAGLALPGDRQPPFQH HHL YDSFDFTSANFSFQDPAALFSGDSAL  
SNQLQQPFVQSQVTMPTTASSSVLQMPMMTLPGMLMSSSSSLAADACTFGGGGGFLKRED  
GGPFS DIGGGGRIGLNLGRRTYFSPADVLA VDRLLMRSRFGGAGPMGMLGLGLGAAAH H  
QPPRCQAEGCKTDLSAAKH YHRRHKVCEYHAKAATVAASGKQQRFCQQCSR YVVLA EFDE  
AKRSCRKRLTEHNR RRRK PAGAQA GKD SPAPPTK KPDGSITSSYTGDHRTNKSTTAAAFS  
PSASSFSCFQQQHALDNGGQSNNATPTSAPPTLSLAAPPSPQQNDGDFGSLDTMLQM  
QPQEADEQGEQQQHLMMTSLVQSQRQQHRDSGNILSCSTTSASDQRHHHNNGGSCCNDN  
SMQHFFEVD FM

>HvSPL3

MISRY YQQCIIFVSSFD TQVGGGAPEILGSGMGSFGMEWNQRSSVLWDWENFPPIGGD  
NPKNAMQAEPFAA VAAAMGNEPLNSSGGSGTFSSSEM GYGSSKSSISASIDSSSKAGS  
NMEFRFAPVKNPDRNTSENTELGKVDNTRTGTSPSSVVA VSSGEPVIGLKL GKRTYFEDV  
CGGQSVKSSPSGAASVPNKSPALSKKAKAEQQKAHNSYCQVEGCKVDLSSVKEYHRKHRV  
CELH SKAPKVVVAGLERRFCQQCSR FHALSEFDQKKRSCRRLNDHNSRRRKPOPEAISF  
SSSRMSTMFYDARQQPNFLFGQAPYVQMRSCGSSSWDEPGGFKVTHTKAPWLKPTTAAGV  
DGMHLSSQQMSDNVMPHGAHHGFDGFM AFKGTSTKFPNQGVQASAVAPNSSGAPDLQHAL  
SLLSSNPVGAANLQPTSQM HSGVAAIAGTPNPAMHVLGSSAGLWLDGGPPLDDHPRFQVF  
ERLGDH DSELQLPKPSYD HASHFDRMH

>HvSPL13

PSASSPSTHQLAPQFHFC DSSPRRALASFVFIAPHRKAWTARTSLASPPQQRPWQRSP  
RQLXXXXXXXXXXXXXXXXXXXXXXXXXXXXXXXXXERC GADLTEAKRYHRRHKVCEAH SKAAVV  
VVAGLRQRFCQQCSR FHELLEFD DQKRSCRRLAGHNERRRKS SAEXNGGDGCRHADQDG  
RSHPGNPPLNHFQIR

>HvSPL23

EFSGHRET CVR ARVFGMDSWEPKMPSWDLGTVVAPSGGGGGGGGGGALDLKLGAPTSWRP  
VPAPVVS VQQQQQQPPSAATAKRARAGQGQQTVPACSVEGCTADLSRCREYHRRHKVCE  
AHSKTPVVA VAGQQQRFCQQCSRFLHLLGEFDEVKRSCRKRLDGHNRRRRKPQPDPLNPA  
LFANHHGVPRFASYPQIFSPTSMAEPKWPGGIAVKTEADAFHEQYYSFNGAASLFHHGKP  
ERKHFPFLTDGGDATFGCQPPAFTITPSSSESSNSSRHSNGKTTMFAHDGGPDHNCALSL  
LSDNPAPAHIMNPAEAHHLGGGGGVTIQYGGGGGGKVARLHNNGDVSLTGLSYVSLGDKG  
APMLLHTSNRSQHAAATATTAVTTSTAPAPTASQMQQYHGYHHQHQV GADQGNHQDAGG  
MHALPFSSW

>HvSPL20

TLTLPWPAGSLFNHLCALHHLTQHSTTTLIHHPASSSQPHAPSPSPSSLGPAMMSGGRM  
NGPASDDFPFGAMQPPPYVGFEGHAGGGGGQRHQGAMMYDNDFDFAVAAA AFGQFQDAPHHQ  
MLAMPNGSGAGGLVPMAPPPMPMPGMQLQMPPMPHGMHGHGDVCP SMGMVKREGGAGDA  
GRIGLNLGRRTYFSPGDMMAVDRVLMRSRLGGVFLGFGRAHQQAPRCQVEDCKADLSGA  
KHYYHRRHKVCEYHAKAALVSTAGKQQRFCQQCSRSHVLMFDEAKRSCRRLAEHNRRRR  
KPAAGSTATSSKDSAPPSKKPNAGAICSSYTGDNSSL SATKSTISSNTSAISCLQLQGQA  
RAAAAARPTALTLGAPPEKDDQQQFRNAMQLHHHQEHQHFITSL LHGNINNSNILSCSS  
VSSNTMPSAVAANGEDDNNNMHMFVDFM

>HvSPL6

MDLEAARVGSQSRHLYGGGLGGELEQARREKRVFGWDLNDWSWDSERFVATPVPAAGNG  
LSLNSSPSSSEEAGPEVARNGNVRVDSDKRKR VVVIHDDNEKDDDPVGNSSNVL SRLRG  
GGNSVAGGAAEDGGVNEEDRNGKRIRVQGGSSNGPACQVEGCCADLSAAKDYHRRHKVCE  
MHAKANTAVVGNTVQRFCQQCSRFLHLLQEFDEGKRSCRRLAGHNKRRRKRTRPESAVGGA  
PIEEKVSSYLLSLLGICANFNSDNAERVQGGQELLSNLWRNLGTVAKSLDPKELCKLLEA  
CQNMQNGSNAGTSEAANALVNTAAAEAAGPSNSKAPFANGGQCGQSSSAVVPVQSNVPMV  
ATTEIPACKLKNFDLNDTCNDMEGFEDGSNCPSWIRQDSTQSPPTSGNSDSTSAQSLSS  
SNGDAQCRTDKIVFKLFKVPSELPPILRSQILGWLSSSPTDIESYIRPGCIILTVYLRL  
VESSWRELSNMSVYLDKLSSSSADNFWTSGLVFVMVQHQIAFMHNGQVMLDKPLAPNSH  
HYCKVLCVSPVAAPFSATVNFRVEGFNLVSSSRLICSIEGRSIFEEDTAIMADDED  
IEYLNFCCLPDRGRGFIEVEDSGFSNGFFPFIVAEQNVCEVCELEGIFKSSSHEQAD  
NDNVMNQALEFLHELGWLLHRVNIISKHDKAELPVA AFNLLRFRNLGIFAMEREWCAVTK  
MLLDLLFDGFVDAGLQSPKEVVLSENLLHSAVRGNSARMVKFLLTYKPNRGLNETAETYL  
FRPDARGPSAFTPLHIAAATSDAEDVLDAL TDDPGLVGLNAWRNARDETGFTPEDYARQR  
GNDAYINLVQMKIDRHLGKGHVVLGVPSSMCPAITDGVKAGDISLEICKAMPVTTTSAAR  
CNICSRQAKMYPSSFARTFLYRPAMFTVMGVAVICVCV GILLHTLPKVYAAPNFRWELLE  
RGAM

>HvSPL9

ALRHGVTPSPTARGTPNSRAHAPAVARLAPAALRRSPTITKAFPSSSRDETTNSPALVAS  
PAAFSPLPTTPDASAEPRTRPSVARADWVARARRVFGARAWLVVA VSSSQEMDASDSGGG  
GAAADAGEPVWDWNLLDFAIPDDDSL LLPWDDPLGIEGDPTTETALLPAPPPQPVEPA  
PAPPSPSVEAGASRRGVRKRDPRLVCPNYLAGIVPCACPELDEMAAAAEEVEEVAEVLG  
PRKKPKAASRGSSGAVVKTGGGGSGSGVAARGGAAEMRCQVPGCEADIRELKG YHKRHRV  
CLRCAHASAVMLDGVQKRYCQCGK

>HvSPL8

GGYSLEPSSLALLPPSSHATIAAHSPHDILQFYHHPTSHHYLAAAAAGGNGSPYGGQFGGGGGGGGGFQS  
YYHQPGTGAPEY  
YFPTLVSSAEENMASFAATQLGLNLGYRTYFPPRGGYTYGHHPRCQAEGCKADLSGAKRYHRRHKVC  
EHHSKAPVVVTAGGLHQRFCQQCSRFLHLLDEF  
DDAKKSCRKRLADHNRRRRKSKPSDADAADKRRTQASKAAASTKGKAAGSSSKSTGTGDGMDIQVQL  
GSGDLSKDQDETMGQGEVVKEMQVDPK GKASMQ  
LQQQQQGHVHGLHLQSQHGFPPSTSA GSCFPQSQA VSSTDNTSNIGVQVQEQQLGLGFHQHSNILQL  
GQAMFDLDFDH

>HvSPL22

GRIGLNLGRRTYFSPGDMMAVDRLLMRSRLGGVFLGLFGGAHHQPPRCQAEGCKADLSGAKHYHRRH  
KVCEYHAKASLVAANGKQQRFCQQCSRSEPDPPSLSLSPSVEMEQ

>AtSPL1

MEARIDEGGEEAQQFYGSGKRSVEWDLNDWKWDGDLFLATQTTRGRQFFPLGNSSNSSSSCSDEGNDK  
KRAVAIQGDTNGALTLNLNGESDGLFPAKKTSGAVCQVENCEADLSKVVDYHRRHKVCEMHSKAT  
SATVGGILQRFCQQCSRFLHLLQEFDEGKRSCRRLAGHNKRRRKTNPEPGANGNPSDDHSSNYLLITLLK  
ILSNMHNHTGDQDLMSHLLKSLVSHAGEQLGKNLVELLLQGGGSQGS LNIGNSALLGIEQAPQEELKQF  
SARQDGTATENRSEKQVKMNDFDLNDIYIDSDDTDVERSPPPTNPATSSLDYPSWIHQSSPQTSRNSDS  
ASDQSPSSSEDAQMRTGRIVFKLFGKEPNEFPIVLRGQILDWLSHSPTDMESYIRPGCIVLTIYLRQAETA  
WEELSDDLGFSLGKLLDLSDDPLWTTGWYVVRVQNQLAFVYNGQVVVDTSLSLKS RDYSHIISVKPLAI  
AATEKAQFTVKGMNLRQRGTRLLCSVEGKYLIQETTHDSTREDDDFKDNSEIVECVNFSCDMPILSGR  
GFMEIEDQGLSSSFFPFLVVEDDDVCSEIRILETTLEFTGTDSAKQAMDFIHEIGWLLHRSKLGEDPNPGV  
FPLIRFQWLIEFSMDREWCAVIRKLLNMFFDGA VGEFSSSSNATLSELCLLHRAVRKNSKPMVEMLLRYI  
PKQQRNSLFRPDAAGPAGLTPHIAAGKDGSEDVLDALTEDPAMVGIEAWKTCRDSTGFTPEDYARLRG  
HFSYIHLIQRKINKKSTTEDHVVNIPVSFS DREQKEPKSGPMASALEITQIPCKLCDHKL VYGTTRRSVA  
YRPAMLSMVAIAAVCVCVALLFKSCPEVLYVFPFRWELLDYGTS

>AtSPL10

MDCNMVSSFPWDWENLIMSNQSKTENEKKQQSTEWFEKGE GIESIVPDFLGFVKVSSGSATSFWHTAV  
SKSSQSTSINSSSPEDKRCNLASQSSPGDSSSNIDFLQVKPSTALEVPIASAESDLCLKLGKRTYSEEFWGR  
NNNDLSAVSMNLLTPSVVARKKTKSCGQSMQVPRCQIDGCELDLSSSKDYHRKHRVCETHSKCPKVVV  
SGLERRFCQQCSRFAVSEFDEKKRSCRKRLSHHNARRRKPQGVFPLNSERVFDRRQHTSMLWNGLSLN  
TRSEEKYTWGTTYETKPTQMESGFTLSFQRGN GSEDQLFTGSTLSFSAFQTSGGFSAGKSNIQLPDKGVG  
ECSSGLHESHDFYSALSLLSTSDSQGIKHTPVAEPPPIFG

>AtSPL11

MDCNMVSSSQWDWEHLIMSNPSRTEDDSKQLPTEWEIEKGE GIESIVPHFSGLERVSSGSATSFWHTAVS  
KSSQSTSINSSSPEAKRCKLASESSPGDSCSNIDFVQVKAPTALVSVASAESDLCLKLGKRTYSEEYWGR  
NNNEISAVSMKLLTPSVVAGKSKLCGQSMQVPRCQIDGCELDLSSAKGYHRKHKVCEKHSKCPKVS VSG  
LERRFCQQCSRFAVSEFDEKKRSCRKRLSHHNARRRKPQGVFSMNPERVYDRRQHTNMLWNGVSLN  
ARSEEMYEWGNNTYDTKPRQTEKSF TLSFQRGN GSEDQLVASSSRMFSTSQTSGGFPA GKSFKQLHGED  
VGEYSGVLHESQDIHRALSLLSTSDPLAQPHVQPFSL LCSYDVVPK

>AtSPL12

MEARIEGEVEGHSLEYGFSGKRSVEWDLNDWKWNGDLFVATQLNHGSSNSSSTCSDEGNVEIMERRRI  
EMEKKKKRAVTVVAMEEDNLKDDDAHRLTLNLGGNIEGNGVKKTKLGGGIPSRAICQVDNCGAD  
LSKVVDYHRRHKVCEIHSKATTALVGGIMQRFCQQCSR FHVLEEFDEGKRSCRRLAGHNKRRRKANP  
DTIGNGTSMDDQTSNYMLITLLKILSNIHSNQSDQTGDQDLLSHLLKSLVSQAGEHIGRNLVGLLQGGG  
GLQASQNIGNLSALLSLEQAPREDIKHHSVSETPWQEVYANSAQERVAPDRSEKQVKVNDFDLNDIYIDS  
DDTTDIERSPPPTNPATSSLDYHQDSRQSSPQTSRRNSDSASDQSPSSSSGDAQSRTDRIVFKLFGKEPN  
DFPVALRGQILNWL AHTPTDMESYIRPGCIVLTIYLRQDEASWHEELCCDLSFSLRRLDLSDDPLWTDGW  
LYLRVQNQLAFAFNGQVVLDTSLPLRSHDYSQIITVRPLAVTKKAQFTVKGINLRRPGTRLLCTVEGTHL  
VQEATQGGMEERDDLKENNEIDFVNFSCEMPIASGRGFMEIEDQGLSSSFFPFVSEDEDICSEIRREST  
LEFTGTDSAMQAMDFIHEIGWLLHRSELKSRLAASDHNPEDLFSLIRFKFLIEFSMDREWCCVMKLLNI  
LFEEGTVDPSDAALSELCLLHRAVRKNSKPMVEMLLRFSPKKNQTLA GLFRPDAAGPGGLTPLHIAA  
GKDGSEDVLDALTEDPGMTGIQAWKNSRDNTGFTPEDYARLRGHFSYIHLVQRKLSRKPIAKEHV VNI  
PESFNIEHKQEKRSMDSSSLEITQINQCKLCDHKRVFVTTHHKSVA YRPAMLSMVAIAAVCVCVALLFK  
SCPEVLYVFPFRWELLEYGTS

>AtSPL13

MDWNFKLSSGYLSGFDQEPDLSPMDGSISFGGSSQSKADFSFDLKLGRNIGNSSSVFGDTEQVISLSKWK  
DSALAKPEGSRSSSSKRTRGNGVGTNQMPICLVDGCSDSDFSNCREYHKRHKVCDVHVKTPVVTINGHKQ  
RFCQQCSRFALEEFDEGKRSCRKRLDGHNR RRRRKPQPEHIGRPANFFTGFQGSKLLFSGGSHVFPTTS  
VLNPSWGNLSVVAVAANGSSYGQSQSYVVGSSPAKTGIMFPISSSPNSTRSI AKQFPFLQEEESSRTASL  
CERMTSCIHSDCALSSSSSSVPHLLQPPLSLSQEAVETVFYGSGLFENASAVSDGSVISGNEAVRLPQ  
TFPFHWE

>AtSPL14

MDEVGAQVAAPMFIHQSLGRKRDL YYPMSNRLVQSQPQRREWNSKMWDWDSRRFEAKPVDVEVQE  
FDLTLRNRSGEERGLDLNLGSLTAVEETTTTTQNVRPNKKVRSRSGSPGGNYPMCQVDNCTEDLSHAKD  
YHRRHKVCEVHASKATKALVGKQMQRFCQQCSRFLHLLSEFDEGKRSCRRLLAGHNRRRRRKTQPEEVAS  
GVVVPGNHDTTNTANANMDLMALLTALACAQGKNAVKPPVGSAPVPDREQLLQILNKINALPLPMD  
LVSKLNNIGSLARKNMDHPTVNPQNDMNGASPSTMDLLAVLSTTLGSSSPDALAILSQGGFGNKDSEKT  
KLSSYENGVTNLEKRTFGFSSVGGERSSSSNQSPSQDSRQDTRSSLQLFTSSPEDESRTVASSRK  
YSSASSNPVEDRSPSSSPVMQELFPLQASPETMRSKNHKNSSPRTGCLPLELFGASNRGAADPNFKGFG  
QQSGYASSGSDYSPPSLNSDAQDRTGKIVFKLLDKDPSQLPGTLRSEIYNWLSNIPSEMESYIRPGCVVLS  
VYVAMSPAWEQLEQKLLQRLGVLLQNSPSDFWRNARFIVNTGRQLASHKNGKVRCSKSWRTWNSPE  
LISVSPVAVVAGEETSLVVRGRSLTNDGISIRCTHMGSYMAMEVTRA VCRQTIFDELNVNSFKVQNVHP  
GFLGRCFIEVENGFGRGDSFPLIIANASICKELNRLGEEFHPKSQDMTEEQAQSSNRGPTSREEVLCFLNELG  
WLFQKNQTSSELREQSDFSLARFKFLLVCSVERDYCALIRTLMLVERNLVNDELNREALDMLAEIQLL  
NRAVKRKSTKMOVELLIHYLVNPLTLSSSRKFVFLPNITGPGGITPLHLAACTSGSDDMIDLLTNDPQEIGL  
SSWNTLRDATGQTPYSYAAIRNNHNYSNLVARKLADKRKQVSLNIEHEVVDQTGLSKRSLSEMKNSS  
SSCASCATVALKYQRRVSGSQRLFPTPIIHSMLAVATVCVCVCFMHAFFIVRQGSFHSWGGLDYGSI

>AtSPL15

MELLMCSGQAESGGSSSTESSLSGGLRFGQKIYFEDGSGSRSKNRVNTVRKSSTTARQCVEGCRMDLS  
NVKAYYSRHKVCCIHSSKSSKVVIVSGLHQRFCQQCSRFLHLLSEFDELEKRSCRRLACHNERRRKQPPTAL  
FTSHYSRIAPSLYGNPNAAMIKSVLGDPTAWSTAR SVMQRPGPWQINPVRETHPHMNVLSHGSSSFTTCP  
EMINNNSTDSSCALSLSNSYPIHQQLQTPNTWRPSSGFDSMISFSDKVTMAQPPPSTHQPPSTHQQY  
LSQTWEVIAGEKSN SHYMSPV SQISEPADFQISNGTTMGGFELYLHQVVKQYMEPENTRAYDSSPQHF  
NWSL

>AtSPL16

MDVMALLTALVCAQGRNEATTNGSPGVQREQLLQILNKIKALPLPMNLTSKLNIGILARKNPEQPSP  
MNPQNSMNGASSPSTMDLLAALSASLGSSAPEAIAFLSQGGFGNKESNDRTKLTSSDHSATTSLEKKTLE  
FPSFGGGERTSSTNHSPSQYSDSRGQDTRSSLQLFTSSPEEESRPKVASSTKYSSASSNPVEDRSPSSSP  
VMQELFPLHTSPETRRYNNYKDTSTSPRTSCLPLELFGASNRGATANPNYNVLRHQSGYASSGSDYSPPS  
LNSNAQERTGKISFKLFKEDPSQLPNTLRTEIFRWLSSFPDMEFIRPGCVILSVYVAMSASAWQLEEN  
LLQRVRSVLVDSEFWNSRFLVNAGRQLASHKHGRIRLSKSWRTLNLPELITVSPLAVVAGEETALIVRG  
RNLTNDGMRLRCAHMGNYASMEVTGREHRLTKVDELNVSSFQVQSASSVSLGRCFIEPMPRFAKS

>AtSPL2

MECNAKPPFQWELENLISFGTSTA EVPRK LKPM EWEIDGFDCTSLYSSSFAYAGSSGSDIAHAFSKSSKST  
SISSSSAEVRTHNFTSETGESLPGEFAKGIDTSPSLELSFGSGDPVLGLKLGKRTYFEDFWEVENAKGLGLP  
VTLASSVSPVKKSKSIPQRLQTPHCQVEGCNLDLSSAKDYHRKHRICENH SKFPKVVVSGVERRFCQQC  
SRFHCLSEFDEKKRSCRRLSDHNARRRKPNGRTYDGKPQVDFVWNRFALIHPRSEEKFIWPSSKHVPS  
RVLMPQPAKTEISDTEHNRFGLLDPKTKTARAELFSKEKVTISSHMGASQDLGDALSLLSNSTTWVSSD  
QPRRFTLDHHPSSNLQPV AHRSA AQLNSVSGYWQPDP PAVEGPTALHRNGVGFQFNENYFSLNQFYN

>AtSPL3

MSMRRSKAEGKRSLRELSEEEEEETEDEDTFEEEEALEKKQK GKATSSSGVCQVESCTADMSKAKQY  
HKRHKVCQFHAKAPHVRISGLHQRFCQQCSRFLHLLSEFDEAKRSCRRLLAGHNERRRKSTTD

>AtSPL4

MEGKRSQGQGYMKKKSYLVEEDMETDTDEEEEVGRDRVRGSRGSINRGGSLRLCQVDRCTADMKEAK  
LYHRRHKVCEVHAKASSVFLSGLNQRFCQQCSRFLHLLSEFDEAKRSCRRLLAGHNERRRKSSGESTYGE  
GSGRRGINGQVVMQNQERSRVEMTL PMPNSSFKRPQIR

>AtSPL5

MEGQRTQRRGYLKDKATVSNLVEEEMENGMDGEEEDGGDEDKRKKVMERVRGPSTDRVPSRLCQVD  
RCTVNLTEAKQYYRRHRVCEVHAKASAATVAGVRQRFCQQCSRFLHELPEFDEAKRSCRRLLAGHNERR  
RKISGDSFGEGSGRRGFSGQLIQTQERNRVDKRLPMTNSSFKRPQIR

>AtSPL6

MDSWSYGRSVFMSNETLLPCDTFAKNRRFEQRLSNNDVLIISDMAGNSNGFSAVSITKVVEEEDENIS  
SSSKFSSQELNRIDFKLRSFLDLGNDDDDTSSRGFALPSKKS RASNLC SQNPLCQVYGCSKDLSSSKDYH

KRHRVCEAHSKTSVVIVNGLEQRFCQQCSRHFHFLSEFDDGKRSCRRLAGHNERRRKPAFYFLPGKRHK  
LLRTSQDVVGNKFLENSSLVLPESFPGSLLYRVIDEDDHRTSRLVSFKDEPTCSMFPTNEQNSSRTYESKP  
AIYSTEVSIIWDLHETAASRSTRALLSAQSQHLSKFPNTTFSITQPNQNLNHSSTDYHQMEQPLWID  
PGKTNAGSSSSCKGKGTSTVDLLQLSSHLQRIEQQRNYTGDVKQEYNELYFPGS

>AtSPL7

MSSLSQSPPPPEMDIQPPALVNDDPSTYSSALWDWGDLLDFAADERLLVDQIHFPVLSPLPLPIPTQTP  
AESELDPSPEESGSGSDRVRKRDPRLICSNFIEGMLPCSCPELDQKLEDAELPKKRVRGGSGVARCQVP  
DCEADISELKGYHKRHRVCLRCATASFVVDGENKRYCQQCGKFHLLPDFDEGKRSCRRLKLERHNNRR  
KRKPVDKGGVAAEQQQVLSQNDNSVIDVEDGKDITCSSDQRAEEEPFLIFEDRHITTQGSVPFTRSINAD  
NFVSVTGSGEAQPDGEMNDTKFERSPSNGDNKSAYSTVCPTGRISFKLYDWNPAEFPRRLRHQIFQWLA  
NMPVELEGYIRPGCTILTVFIAMPEIMWAKLSKDPVAYLDEFILKPGKMLFGRGSM TVYLNNMIFRLIKG  
GTTLRVDVKLESPKLQFVYPTCFEAGKPIELVCGQNLQPKCRFLVSFSGKYLPHNYSVVPAPDQDG  
KRSCNNKFYKINIVNSDPSLFGPAFVEVENESGLSNFIPLIIGDAAVCSEMKLIEQKFNATLFPGEQVTAC  
SSLTCCCRDFGERQSTFSGLLLDIAWSVKVPSAERTEQPVNRCQIKRYNRVLNYLIQNNASILGNVLHN  
LETLVKKMEPDSL VHCTCDCDVRLLENMDLASDIHRKHQSPIESKVNPPSSGCCC VSSQKDIPSRILNFN  
KDPEAGLDCKERIQADCSPDSGGKETDPLLNKEVVMNVNDIGDWPRKSCIKTHSALAFRSRQTMFLIAT  
FAVCAVCAVLYHPNKVTQLAVAIRMRLVHKI

>AtSPL8

MLDYEWDNPSSIVLSGDERNPDSPTRSSFSFFDPISHYNNDRHRHITISPPLLSSFSNQQQHHHTLYGQTN  
SNNQFLHHHHHHHSLYGSTTTTTTPY GASDPIYHPHSSAPPASLFSYDQTGPGSGSGSSYNFLIPKTEVDFT  
SNRIGLNLGGRTYFSAADDDFVSRLYRRSRPGESGMANSLSTPRCQAEGCNADLSHAKHYHRRHKVCEF  
HSKASTVVAAGLSQRFCQQCSRHFLLSEFDNGKRSCRKRLADHNRRRRKCHQSASATQDTGTGKTTPK  
SPNDSGVKASSSPSNAPPTISLECFRQRQFQTTASSSTSASSSSNSMFFSSG

>AtSPL9

MEMGSNSGPGHGPGQAESGGSSTESSFSGGLMFGQKIYFEDGGGGSGSSSSGGRSNRRVRGGGSGQSG  
QIPRCQVEGCGMDLTNAKGYYSRHRVCGVHVKTPKVTVAGIEQRFCQQCSRHFHQLPEFDLEKRSCRRL  
AGHNERRRKQPASLSVLASRYGRIAPSLYENG DAGMNGSFLGNQEIGWPSRSLDTRVMRRPVSSPSW  
QINPMNVFSQGSVGGGTSFSSPEIMDTKLESYKGIGDSNCALSLLSNPHQPHDNNNNNNNNNNNNNT  
WRASSGFGPMTVTMAQPPPAPSQHQYLNPPWVFKDNDNDMSPVLNLGRYTEPDNCQISSGTAMGEFEL  
SDHHHQSRQYMEDENTRAYDSSSHHTNWSL

>OsSPL1

MSSGLKKKGLEWDLNDWRWDSNLFLATPSNASPSKCSRRELGRAEGEIDFGVVDKRRRVVS  
PEDDDGEECINAATTNGDDGQISGQRGRSSEDEM PRQGTCSSSG PCCQVDGCTVNLSSAR  
DYNKRHKVCEVHTKSGVVRIKNVEHRFCQQCSRHFHFLQEFDEGKKSCRSLAQHNRRRRK  
VQVQAGVDVNSLHENHSLNNTLLLLKQLSGLDSSGPSEQINGPNYLTNLVKNLAALAGT  
QRNQDMLKNANSAAIASHTGNYVAKGNSLHDSRPHIPVGTESTAEPTVERRVQNFDLND  
AYVEGDENRTDKIVFKLFGKEPNDFPSDLRAQILSWLSNCPSDIESYIRPGCIILTIYMR  
LPNWMWDKLAADPAHWIQKLISLSTDTLWRTGW MYARVQDYLTLS CNGNLMLASPWQPAI  
GNKHQILFITPIAVACSSANFSVKLNIAQPTTKLLCIFGGKYLIQEATEKLLDDTKMQ  
RGPQCLTFSCSFPSTSGRGFIEVEDLDQSSLSFPFVVAEEDVCSEIRTLEHLLNLVSFDD  
TLVEKNDLLASRDALNFLHEFGWFLQRSHIRATSETPKDCTEGFPAARFRWLLSFAVDR  
EFCAVIKKLLDTL FQGGVDLDVQSTVEFVLKQDLVFVAVNKR SKPLIDFLTYTTSSAPM  
DGTESAAPAQFLFTPDIAGPSDITPLHIAATYS DTAGVLDALTD DPQQLGIKAWKNARDA  
TGLTPEDYARKRGHESYIEMVQNKIDSRLPKAHVSVTISSTTSTDFTEKHASQSKTTDQ  
TAFDVEKGQQISTKPPLSCRQCLPELAYRHHLNRFLSTRPAVLSLVAIAAVCVVGLIMQ  
GPPHIGGMRGPFWRNSLRSGPK

>OsSPL2

MDWDAKMPSWDLGTVVGPSGGGGGGGGGGALDLKLGAPTSWKTTTTVSAASAAPAAVAP  
PPPPASSSSAAAAGKRARAGQGQAAVPACSV EGAADLSKCVRDYHRRHKVCEAHSK  
TAVVTVAGQQRFQCSRHFHLLGEFDEEKRSCRKRLDGHNKRRRKQPDP LNPGNLFAN  
HHGAARFTSYPIQIFSTAASMSQPETKWPANVVKTEAADVFQEPYHALHLNGAGAAAAS  
IFHHGGNKARKHHFPFLTADHGGGAAAASPLFGCQPF TITPSSSRSSSSSRHSNGKMFA

HDGGLDNCALSLLSDNPTPTAQITIPQPLFAGGGQYGGGGGGDVSLTGLSYVRMAGKDTS  
ILAKSATTATTATPTTTTSAQLQYHGYHHHVSADQGSDDAAIQALPFSSW

>OsSPL3

MGSFGMDWNQKSSVLWDWENMPPIGNSANENPKNVMLAESKLAGVGVDIGHESGHSSGGT  
FSSSSEIGYGSSKSSISASIDSPSKVGNTELNFASAEHDKNMDKGKSKVDDTGTSRSP  
VVAANRVEPLIGLKLKGRTYFEDVCGGQNVKSSPSGVSVATPSPGLAKKVKVAQQNTQNP  
HCQVEGCNVDLSSAKPYHRKHRVCEPHSKTLKVVIVAGLERRFCQQCSRFBHGLAEFDQKKR  
SCRRRLHDHNARRRKPQPEAISLSSRLSTLLYGDARQQASFLFGQAPYGMGSCASSWD  
NPVPGGFKFTATKAPWSRPTIAAGVDGTHVSNQQASGNVLPHGAAHHSFDGLMAFKETNAK  
VLNQGMEASAVASGSARGPDFEHALSLLSIDSVGAANLQPGSQIHPGVTAIAGTSPVMM  
PSPAIWQGGSLDQQAQFQAFDRLGNDDDEDHLQLPKPSYDNSHYDQMN

>OsSPL4

MDWMPPPKPTSPRSPPLLWDWADAAVPGSSSGEVSAAAAAAAAAAHPGRRRKEKRGRAEEGG  
GGGGEVRCQVEGCGVELVGVKDYHRKHRVCEAHSKFPRVVVAGQERRFCQQCSRFBHALSE  
FDQKKRSCRRLYDHNARRRKPQTDVFSYASARPPSLLFDDNRQISFVWNKAPLSHVRP  
FAISPWESSEVGTDDGHIYLDKSHISKSLPAFNDDIDELLPMKDFSAATIWMFFGVLF  
RTAQESCMSFH

>OsSPL5

MAVPAAAVAADVDFGYAAPMPPPYVGFDPAGMGGGERQLFQHGGACHGLYDGGGLDFSA  
AFQEAATLGVLPGGNLLQSLAPPAAAAATPSSLQMPMMMSLPLPATAADVYPFGGGGGF  
VKREDGPVLDVVGGGGGGRIGLNLGRRTYFSPADVLAVDRLLLRSRLGGMGMEMGMGMGV  
LGLGLAAAHHHQPPRCQAEGCKADLSAAKHYYRRHKVCDFAKAAAVLAAGKQQRFCQQ  
CSRFBVLAEFDEAKRSCRKRLTEHNRRRRKPAGGQSSKDSPPPPPSKKGTDASIASSYT  
SCDHHKAAASTTTASGVSLQELADHHDVGGGHQAAMAAAPPPTLSLAALPPQEEDDEDE  
DGGLGNVLMMQHHQRRRLQHDGDGDDDDVAAAAAHHHLMRSLARQQQQRHSSGCSNNND  
GDDDDHNNNNNILSCSSASDQQNSSNNNNMHFFEVDFI

>OsSPL6

MEARVGAQSRHLYGGGLGEPMDRRDKRLFGWDLNDWRWDSDFVATPVPAEASGLAL  
NSSPSSSEEAGAASVRNVNARGDSDKRKRVVVIDDDDVEDDELVENGGGSLSLRIGGDAV  
AHGAGVGGGADEEDRNGKKIRVQGGSPGPACQVEGCTADLTGVRDYHRRHKVCEMHAKA  
TTAVVGNTVQRFCCQCSRFBHPLQEFDEGKRSCRRLAGHNRRRRKTRPEVAVGGSAFTED  
KISSYLLGLLVCANLNADNAEHLRGQELISGLLRNLGAVAKSLDPKELCKLLEACQSM  
QDGSNAGTSETANALVNTAVAEAAGPSNSKMPFVNGDQCGLASSSVVPVQSKSPTVATPD  
PPACKFKDFDLNDTYGGMEGFEDGYEGSPTPAFKTTDSPNCPSWMHQDSTQSPQTSGNS  
DSTSAQSLSSNGDAQCRTDKIVFKLFEKVPSDLPPVLSQILGWLSSSPTDIESYIRPG  
CIILTVYLRVESA WKELSDNMSSYLDKLLNSSTGNFWASGLVFMVRHQIAFMHNGQLM  
LDRPLANSAAHYCKILCVRPIAAPFSTKVNRVEGLNLVSDSSRLICSFEGSCIFQEDTD  
NIVDDVEHDDIEYLNFCPLPSSRGRGFVEVEDGGFSNGFFPFIIAEQDICSEVCELESI  
FESSHEQADDDNARNQALEFLNELGWLLHRANIISKQDKVPLASFNIWRFRNLGIFAME  
REWCAVTKLLLDLFTGLVDIGSQSPEEVVLSENLLHAAVRMKSAAQMVRFLLGYKPNESL  
KRTAETFLFRPDAQGPSKFTPLHIAAATDDAEDVLDALTNDPGLVGINTWRNARDGAGFT  
PEDYARQRGNDA YLNMVEKKINKHLGKGHVVLGVPSSIHVPITDGVKPGEVSLIEMTVP  
PPAPSCNACSRQALMYPNSTARTFLYRPAMLTVMGIAVICVCVGLLLHTCPKVYAAPTFR  
WELLERGP

>OsSPL7

MEGNGCGSGATPRGVVGMHWAPVVTSPSPQPPFLPPAPCRPDVQMQQQGGTCLKLK  
RPCFWGGDAGQVAQSGGGGGGGGGGSADQGKRKEKAATAVPVVPRCQVEGCDITLQGV  
KEYHRRHKVCEVHAKAPRVVVGTEQRFCQQCSRFBHVAEFDDAKKSCRRLAGHNERRR  
RSNASEAMARGSAHPHGMPVLGHGFPPYGLPTSSAGALSLLSSARATGPWLMPTPDISAR  
SSAALDELIAENRAALLSWQFFSDRQPPPAGRPTGRSPGSETAGGWHAHLQARPPPPGAG  
GQHENQSGHVTLDLMQATTAAGGSGAPFRPVPARPPKEGGDAGCTSDAWTPSPMEGARVV

>OsSPL8

MMNVPSAAAASSCDDFGYNATPPPPPSLLPIMDQDGGGGSIQRDHHQHNNHQQLGYNLEP  
SSLALLPPSNAAAAAAHATIAHASPHDLLQFYPTSHYLAAGGAGGGGNPYSHFTAAAA  
AGSTFQSYQQPPQDAPEYYFPTLVSSAEENMASFAATQLGLNLGYRTYFPPRGGYTYGH  
HPPRCQAEQCKADLSSAKRYHRRHKVCEHHSKAPVVVTAGGLHQRFCCQCSRFLHLLDEFD  
DAKKSCRKRLADHNRRRRKRKSPSDGEHSGEKRRRAQANKSAATKDKAGSSSKNAGIGDGF  
TQLLGGAHMSKDQDQAMDLEGEVVEKAVDPKPKASMQQQQQQAHHGHIHQSHQQHGFPFPS  
SSGSCLFPQSQGAVSSTDTSNIAQVQEPSLAFHQHQQHHSNQLQLGQAMFDLDFDH

>OsSPL9

MDAPGGGGGGGGGGGGVVDAGEPVWDWGNLLDFAVHDDDSLVLVPWGDDSIGIEADPAEAL  
LPPAPSPQPAEAEAEAAGPASLPSSMQAEGSKRRVRKRDPRLVCPNYLAGRVPCACPEID  
EMAAALEVEDVATELLAGARKKPKGAGRGSAAVGGSGGGASRGTPAEMKCCQVPGCEADI  
RELKGYHRRHRVCLRCAHAAAVMLDGVQKRYCQQCGKFHILLDFEDDKRSCRRKLERHNC  
RRRRKPDSSKILEKDIDDQLDFSADGSGDGELREENIDVTTSETLETVLSNKVLDRETPV  
GSDDVLSSPTCAQPSLQIDQSKSLVTFAASVEACLGTKQENTKLTNSPVHDTKSTYSSSC  
PTGRVSFKLYDWNPAEFPRRLRHQIFEWLSSMPVELEGYIRPGCTILTVFVAMPQHMWDK  
LSEDTGNLVKSLVNAENSLLLGKGAFFIHNMMIFQVLKDGATLTSTRLEVQSPRIHYVH  
PSWFEAGKPIDLILCGSSLDQPKFRSLVSFDGLYLKHDCRRILSHETFDCIGSGEHILDS  
QHEIFRINITTSKLDTHGPAFVEVENMFGLSNFVPILVGSKHLCSELEQIHDALCGSSDI  
SSDPCELRGLRQTAMLGFLIDIGWLIRKPSIDEFQNLNLANIQRWICMMKFLIQNDFIN  
VLEIIVNSLDNIIGSELLSNLEKGRLENHVTEFLGYVSEARNIVDNRPKYDKQRQVDTRW  
AGDYAPNQPKLGISVPLAESTGTSGEHDLHSTNAASGEEENMPLVTKALPHRQCCHPETS  
ARWLNAASIGAFPGGAMRMRLATTVVIGAVVCFAACVVLPHPHRVGVLAAPVKRYLSRNY  
SS

>OsSPL10

MMSGRMNAAGDESPFFGAMQAPGPGAYVGFHDGAAAVAAAAAAAQRAGMLQHNNHHMYD  
GLDFAAAMQFGGGQDAPHPQLLALPPSMAAPPPPPMPMPLQMPMTMPMPGDVYPALGIV  
KREGGGGGQDAAAGRIGNLGRRTYFSPGDMLAVDRLLMRSRLGGVFGGLGFGGAHHQPPR  
CQAEQCKADLSGAKHYHRRHKVCEYHAKASVVAASGKQQRFCQCCSRFHVLTDFEAKRS  
CRKRLAEHNRRRRKPAAAATTAVA AAKDAAAAPVAAGKKPSGGAATS YTGDNKNVVSMSA  
AKSPISSNTSVISCLPEQGKHA AAAARPTALTLGGAPPHESSAPQIGAMLHHHHHHHQDH  
MQVSSLVHINGGGGGGSNNILSCSSVCSSALPSTATNGEVSDQNNDNSHNNGGNNNNMHL  
FEVDFM

>OsSPL11

MECNPVSTTSSSLWDWDATASAEP PPPGKRGRDSSSASASAKRGRSAAAAGDAAAV  
AAEAPRCQVEGCGLELGGYKEYYRKHVCEPHTKCLRVVAGQDRRFCQCCSRFHAPSEF  
DQEKRSCRRRLSDHNARRRKPQTDVFAFGSGTLPRSLFDDRQQISFAWDNNAPLNHANTT  
SSSSWTSDLQLSQVMDISKRSRKAGADSANIRLSNALPTLCHDTNELLPIKGADASETAS  
KLDGALDVQRALSLLSASSRGLTDPGHQTSSIIQFTNSNQNSTLPSVPSEGNSNVPFWVD  
GQHQA VEPQVFQFTMDTGNTVFPDLERIKPSYESSMFGLNQIH

>OsSPL12

MASFGMNWNQKSPVFDWENPAPFGPNTMENPKSIPHPEPRGVVVAANHGSTNSSGGTF  
TSSSELANGSSKSSLSASFSSSKLGNLEFRFASVKGHGKNMCKDGEAGRVEDSGTSPA  
VAVSHGEPVIGLKLGRTYFENVCGGQNVKSSSAASGVTCPSTVVKKMKVVSQQSTQSSYC  
QVEGCKVDLSSAREYHRKHKVCEAHSKAPKVVVSGLERRFCQCCSRFHGLAEFDQKKKSC  
RRRLSDHNARRRKPQQAISFGSSRLATMFYDARQQTDIYFGQSPFGQVRSNAISSCDNL  
GGFKFTEAKLPWMKPMKTIGLEDLNFSTLQMPGNVVSHTVHHHDFDGLIPFKGNTPKVLN  
QGVDPAACAVVSSNSNGAPDLRRALSLLSSDSWGPADVQAGSQVHPGGVMPPLAVAAATVT  
APTNPVSMHALHPSTGGGGFWQDGGDPPPLDHASQAQAFMHPGNGSSSGYGHLH

>OsSPL13

MDRKDKARKNFSSSSSSSAASMAALAAAAAGDGGAAALPSPMEEDKKPRLVASSLAPVAG  
GGGGSSSSAAVAAGASSSSSSSVAAAARRGAGRAGGGAPSGGGGGPRCQVERCGVDLS  
EAGRYNRRHKVCQTHSKEPVVLVAGLRQRFCCQCSRFFELTEFDDAKRSCRRRLAGHNER

RRKSAADTAHGENCRHADQDAGRSHQGTGNPPFQIR

>OsSPL14

MEMASGGGAAAAAGGGVGGSGGGGGGGDEHRQLHGLKFGKKIYFEDAAAAAGGGGTGSGS  
GSASAAPPSSSSKAAGGGRGGGGKNGKGVAAAAPPPPPPPRCQVEGCGADLSGIKNYY  
CRHKVCFMHSKAPRVVVAGLEQRFCQQCSRFLHLLPEFDQGKRSCRRLAGHNERRRRPQT  
PLASRYGRLAASVGEHRRFRSFTLDFSYPRVPSSVRNAWPAIQPGDRISGGIQWHRNVAP  
HGHSSAVAGYGANTYSGQGSSSSGPPVFAGPNLPPGGCLAGVGAATDSSCALSLSTQPW  
DTTTHSAAASHNQAAAMSTTTSTFDGNPVAPSAMAGSYMSPWTGSRGHEGGGRSVAHQ  
PHEVSLDEVHPGSHHAHFSGELELALQGNGPAPAPRIDPGSGSTFDQTSNTMDWSL

>OsSPL15

MQREVGPPQVAPPMFLHQIQPLPHATAAKKRGNPWPAAVAAAEAKGGGNWNPRMWDWDS  
RALTAKPSSDALRVNAGLSHHQQQQQSPPAAKAAEALRQGGGGSGGLNLQLGLREDA  
TPMDVSPAATTVSSSPSPASSAPAQEPVVRPSKRVRSGSPGSASGGGGGGGGGGNSGGG  
GGSYPMCQVDDCRADLTNAKDYHRRHKVCEIHGKTTKALVGNQMQRFCQQCSRFLPLSEF  
DEGKRSCRRLAGHNRRRRKTQPTDVASQLLLPGNQENANRTQDIVNLITVIARLQGSN  
VGKLPSPPIPDKDNLVQIISKINSINNGNSASKSPPSEAVDLNASHSQQQDSVQRTTNG  
FEKQTNGLDKQTNGFDKQADGFDKQAVPSTMDLLAVLSTALATSNPDSNTSQQGSSDSS  
GNNKSKSQSTEPANVVNSHEKSIRVFSATRKNDALERSPEMYKQPDQETPPYLSLRLFGS  
TEEDVPCKMDTANKYLSSESNPLDERSPSSSPVTHKFFPIRSVDEDARIADYGEDIAT  
VEVSTSRAPRPLELFKDSERPIENGSPNPAYQSCYTSTSCSDHSPSTSNSDGQDRTG  
RIIFKLFGKEPSTIPGNLARGEIVNWLKHSPNEMEGYIRPGCLVLSMYLSMPAIAWDELEE  
NLLQRVNTLVQGSDFWRKGRFLVRTDAQLVSYKDGATRLSKSWRTWNTPELTFVSPIA  
VVGGRKTSLLKGRNLTIPGTQIHCTSTGKYISKEVLCASYPGTIYDDSGVETFDLPGE  
HLILGRYFIEVENRFRGNSFPVIANSSVCQELRSLEAELEGSQFVDGSSDDQAHDARRL  
KPKDEVHLHFLNELGWLFQAAASTSAEKSDSSGLDLMYFSTARFRYLLLFSSERDWCST  
KTLLEILAKRSLASDELSTLEMLSEIHLNRAVKRKSSHMARLLVQFVVVCPDDSKLY  
PFLPNVAGPGGLTPLHLAASIEDAVDIVDALTDPPQQIGLSCWHSALDDDGGQSPETYAKL  
RNNNAYNELVAQKLVDKNNQVTIMVGKEEIHMDQSGNVGEKNKSAIQALQIRSCNQCAI  
LDAGLLRRPMHSRGLLARPYIHSMLAIAAVCVVCVCFMRALLRFNSGRSFKWERLDFGTI

>OsSPL16

MEWDLKMPPAASWELADELENSGGGGVPAAVSSSSAAVGGGVNAGGGGRQECSVDLKLGG  
LGEFGGGGAQPRVAVAGEPAKKGKGPAAAATGAAAAASSAPAKRPRGAAAAGQQQCPSCAV  
DGCKEDLSKCRDYHRRHKVCEAHSKTPLVVVSGREMRFCQQCSRFLHLLQEFDEAKRSCRK  
RLDGHNRRRRKPQPDPMNSASYLASQQGARFSPFATPRPEASWTGMIKTEESPYTHHQI  
PLGISSRQQHFVGGSTSDGGRRFPFLQEGEISFGTGAGAGGVPMQAAAAAAASVCQPLK  
TVAPPPPHGGGGSGGGKMFSDGGLTQVLSDCALSLLSAPANSTAVGGGRVVVQPT  
HIPMAQPLISGLQFGGGGGSSAWFAARPHHQAATGAAATAVVVSTAGFSCPVESEQLNT  
VLSSNDNEMNYNGMFHVGGEGSSDGTSSSLPFSWQ

>OsSPL17

MATGGSGGGGGGGGGDDVHGLKFGKKIYFEQDAAASASAAAVESSSTSSGGGGKKGKGV  
AAAAAPPPPLPPRCQVEGCGVDLSGVKPYCRYHKVCMHAKKEPIVVVAGLEQRFCQQCSR  
CSVHMVRFHQLEFDQEKKSCRRLAGHNERRRKPTGPLSSRYGRLAASFHEEPGRSRS  
FVVDIFSYPVPSSVRDAWPAIQPSDRMSGSIQWQGGHELHPRSAVAGYSDHHAFFSSHGG  
SAAGAPMLHHPAFELTSGGCLAGVATDSSCALSLSTQPWDTTQSTSSHNRSPMSSTAS  
AFGGGNPVSPSVMASNYMAASPGWNSSSRGHDGARNVHLPPPHGVVLNEVPPGSVHHGH  
FSGELELALQGGAPSNRPEAEHGSGSGAFSHSTNAMNWSL

>OsSPL18

MDWDLKMPVSWDLAELEHNAVPMMAAAASAAEPGIAAVAASRGAPGRPECSVDLKLGGGLG  
EFGAADALKEPAAAAKAPVSSAAAAASVAKVPPSTSTLKRPRGGGGGGGGQCPCSAVDGC  
KADLSKHRDYHRRHKVCEPHSKTPVVVSGREMRFCQQCSRFLHLLGEFDEAKRSCRKRLD  
GHNRRRRKPQADSMSSGSFMTSQQGTRFASFTPPRPEPSWPGIHKSEETPYSHHHHPHP  
VMTSRQPHFVGSPPSATTAAAFSPKEGRRFPFLHEGDQISFGGGGGAAAAATLEISVCQTT



VVAPPPPESSSSNKMFSDDLTTATTTTTTAHHHHHHHHQVLDSDCALSLSSPANSSSVD  
VSRMVQPSPAAAAGAEHHHHHQIPMAQPLVPNLQQQFGGSSPWFASSPAAA AVAGGGFAC  
PSMDSEQQQQQLNAVLPVGSNENEMNYHGMFHVGGEGSSDGTSPSLPFSWQ

>TaSPL1

MSGGLKNKKKKGHEWDLNDWRWDGNLFLATPSPNADAPSGCGSR  
ELGRAGEGCSFGAAADKSRRRRRRRTTVDNPEECSNTAIHNERNAVWRGQIGEEEGP  
ASATAGASSSSAPSCQVDGCHADLSDDRDYHRRHKVCEPHTKSTLVRIKNIHRFCQQ  
CSRFLVQEFDEGKKSCRSLATHNRRRRKAPAEAVNSLGENQSLTNTLLLLRQLAG  
QDSASSSEQINGPNLLVSLKLNLA AVAGTQACQDMLKDATSSNAGNYVGNQSGPPVPA  
EPPVKRRAQNFDLNDAYVEEDESRTDKIVFKLFGKQPNDFPADLRAQILNWL SHYPS  
DMESYIRPGCVILTIYLRPNWMWGKINVPAPWIENLISISTHGFWETGWLYARVQD  
RLTLSCNGRLMLVSPWRPVIGDKHQILCVTPI

>TaSPL3

MEWNQRSSVLWDWENFPPIGENPKNAMQADPRFAAVAATMGNEP  
LHSSGGSGTFSSSSEMGGYSSKSSMSASIDSSNRAGNNMEFRFAPVKNPDRNTSKNTE  
LGKVDNTRTGTSPSPVAVSSGEPVIGLKLGRITYFEDVCGGQNVKSSPSGAASAPNK  
SPALGKKAKAEQQKPHNSYCQVEGCKVDLSSVKDYHRKHRVCELHSAKPKVVVAGLER  
RFCQQCSRFLHALAEFDQKKRSCRRLNDHNSRRRKPQPEAISFSSSRMSTMFYDARQQ  
PNFLFGQAPYVQMRSCGSSSWDDPGGFKVTHTKAPWLKPTTAAGVHGIHLSSQQMSDN  
IMPHGAHHGFDGFMFKGTCTKFPNQGVQASAVASDSSGAPDLQHALSLLSSNPVGAA  
NLQPSPQMHSVAAIAGAPNPAMHALGSSTGLWLDGSQPLDDHPRFQVFERLGDHDSE  
LQLPKPSYDHASHFDRMH

>TaSPL6

MEAARVGSQSRHLYGGGLGGELEQARREKRVFGWDLNDWSWDSE  
RFVATPVPAAVGNGLSLNSSPSSEEAEAEVARNGNGRVDSDKRKRVVVIHDDDNEKD  
EDPVGNSNNVLSLRIGGNTVAGGVAEDGGVNEEDRNGKKIRVQGGSSSGPACQVEGCC  
ADLSAAKDYHRRHKVCEMHAKANTAVVGNTVQRFCCQCSRFLHLLQEFDEGKRSCRRL  
AGHNKRRRKRTRPENAVGGTPIEEKVSSYLLSLLGICANFNSDNAEHLQGGQELLSNLW  
RNLGNVAKSLDPKELCKLLEACQSMQNRSNAGTSEAANALVNTAAAEAAGPSNSKAPF  
ANGGECGQTSSAVVPVQSNATMVATTETPACKFRNFDLNDTCNDMEGFEDGSNCPSWI  
RQDSTQSPQTSGNSDSTAQSLSSNGDAQCRTDKIVFKLFEKVPSELPPILRSQIL  
GWLSSSPTDIESHIRPGCIILTVYLRLVESSWRELSNMSVYLDKLSSSSADNFWTSG  
LVFVMVRHQIAFMHNGQVMLDRPLAPNSHHYCKVLCISPVAAPYSATVNFRVEGFNLV  
SSSRILCSIEGRCIFEEDETAIMADDAEDEDIEYLNFCCLPDTRGRGFIEVEDSGFS  
NGFFPFIVAEQNVCEVCELESTFKSSSLEQPKDNAMNQALEFLHELGWLLHRVNI  
SKHDKVESPVPTFNLLRFRNLGIFAMEREWCAVTKMLLDLLFDGFVDAGLQSPKEVLL  
SENLVHSAVRGKSARMVRFLTYKPNKNLKETAEYLFPRDARGPSAFTPLHIAAATN  
DAEDVLDALTDGPGLVGLNAWRNARDEIGFTPEDYARQRGNDAYINLVQKKIDRHLGK  
GHVVLGVPSSMCPGITDGVKAGDISLEICKAMPMTTTSASRCNICSQAKMYPNSFAR  
TFLYRPAMFTVMGVAVICVCGILLHTLPKVYAAPNFRWELLERAM

>TaSPL8

MMNLPAAGNSCDEFGYGAPNPPPSLFPIMDHQEGGGGIHREH  
DHHHHHLGGYTLEPSSLALLPSSSHATIAAHSPHDILQFYHHPTSHHYLAAAAAGGNG  
SPYGGQFGGGGTAGGFQSYHQQVGTGAPEYYFPTLVSSAEENMASFAATQLGLNLGYR  
TYFPPRGGYTYGHHPRCQAEGCKADLSGAKRYHRRHKVCEHHSKAPVVVTAGGLHQR  
FCQQCSRFLHLLDEFDDAKKSCRKRLADHNRRRRRKSKEPSEADAADKRRTQASKAASKG  
KAAGSSSKSTGTGDGMDIQVQLGSGDLSKNQDETMGLGEVVKEMQVDPKKGKASMQQQQ  
GHHGHGLHLQSQHGFPPSSSAGSCFPQSQA VSSTHNTSNIGQVQQEQPGLGFHQHSN  
ILQLGQAMFDLDFDH

>TaSPL15

MAMDVSPTTTTLSSSPPARASQEQAARPSKRVRSGSPGTASGG  
GGGGGGGSASGGGSYPMCQVDDCRADLTSKDYHRRHKVCEIHSKTTKAVVGNQMQR

FCQQCSRFHPLSEFDEGKRSCRRLAGHNRRRRKTQPTDVASQLLLPENQENAANRTQ  
DIVNLITVIARLQGGNVGKLPSPPIPKDNLVQIISKINSINNANSLAKSPPSEID  
LNASQGGQQDSSVQNATKVVDKQTVPSTMDLLTVLSGALGTSTPETNTSQQSGSSDSS  
GNNKSKSHSTEPACVVNSHEKSIRPFPAAGMLRSSSTHGSPPEVYKQPDRDTHPYLSL  
QLFGNNEIPVKMDTANKYLSSESSNPMDERSPSSSPVTHFFPTRSVNEGIRHPRI  
ADYGEDGATVENSTRAWCAPPELEFKDSERPTENGSPNPPTYQSCYASTSGSDHSPS  
TSNSDGQDRGTGKIIFKFLGKEPGSIPGNLRDEVVNWLKHSPTMEGYIRPGCLVLSMY  
LSMPTIAWDELQENFLQRVNSLVQASDLDFWRKGRFLVRSDNQLVSYKDGMRSLKSW  
RTWNTPELTLVTPIAVVGGRKTSVLKGRNLTIPGTQIHCTSAGKYISKEVLCSAYPG  
TIYDDSGVETFDLPGPSLTLGRCFIEVENRFRGNSFPVIFANKSICQELRNLEDELE  
DSRFPDVPDQVHDARRLKPRDQVLHFLNELGWLFQKAAACTPSTKSDVSHSELIQF  
STARFRHXLLFSNERDWCSLTKTLLEILTKRSMVSDLSHETLEMLSEIHLNRAVKR  
KSSHMVHLLVQFVVICPDNSKLYPFLPNYPGPGGLTPLHLAASIDDAEDIVDALTD  
QQIGLSCWHSVLDDEGLSPEVYATFRNNGSYNELVTRKLMDRKNSQVTIVLNKGEIHI  
DQPGNVGANNASGIQALEIRSCNQCAILESGLLRRPMRSRGLLARPYIHSMLAIAAVC  
VCVCFMRALLRFNSGRSFKWERLDFGPT

>TaSPL17

MEIGSGGDGSGGGGGDDQQRHGLKFGKKIYFEDATGTGGGSGSG  
GVNASLSKPPAGSGRKGKAVAAGGASGSAPPRCQVEGCGVDLSGAKQYHSRHKVCSMH  
TKEPRVVVAGLEQRFCQQCSRFHQLPEFDQGKRSCRRLAGHNERRRKAPPGPLATRY  
GRLAASFEEPGRFRSYLLDFSYPVPSSVRDAWPGARPGYRMPGEIQWQGNLDRPHT  
GAATGYHGHAYSSHGGGFPPELPPSGCLAGVAADSSCALSLSTQPWDNTPHGASH  
DHRSAFGDHPVGVSPSIMASNYMPPPASPWGGSRGHEGGRNAPHQQLPHDVLHEAH  
HPAGSSQHGHFSGELELALQGYRPAPGPRGGDHSSGGGAFDHPGSSSNWSL

>TaSPL20

MMSGGRMNAAASDDFPFAAMQPPPYVGFEGHAGGGGQRHQGAMMY  
DNFDFAAAADAFGQFQDAPHHQMMLALPPSGNGAGGLVPMAPPPMPGMQLQMPPMAMHG  
HGDVYPAMGMVKREGDAGRIGLNLGRRTYFSPGDMMAVDRVLMRSRLGGVFGLGFRG  
HHQAPRCQVEDCRADLSGAKHYHRRHKVCEYHAKASLVSAAGKQQRFCQQCSRFHVL  
EFDEAKRSCRRLAEHNRRRRKPAAGSTAASSKDSAPPSKKNAGAISSSYTADNNTL  
STTKSTISSNTSAISCLQQGQAGAVAPTRPTTLTLGASPENDDHQQLHHHQEQQHF  
TSLHNNINNSNILSCSSVSSSTMPAAAAANGEVSDQNNNDNANNMNMHMFVDFM

>TaSPL21

MMSRSLSGGTMAPVSDMTDFGYAPMQSYPNFEPAGMVMPGDRQP  
PFQHHLHYDSLDFNAAAFQFQDAPVALFSSGSAFNSQLQQPFLQTQVSMPTMASSLLQ  
APMMLTLPGLTSSASPVDAYTFGGGGSAGFLKREEGGPFSVGGGGRIGLNLGRRTY  
FSPADVLAVDRLLMRSRFGGAGAMGMLGLGLGAAAHQHQTTPRCQAEGCKADLSAAKHY  
HRRHKVCEYHAKAATVAASGKQQRFCQQCSRFHVLAEFDEAKRSCRKRLTEHNRRRK  
PAGAQQKDSPPPSKKADASITSSYTGDRHTNKSTTGAAAFSPSASGFSCLLQQQQQQQH  
EIDNGGQSSNATPTNLSLAAPPPPPQDDAGFGAGLDTMLLIQQQGPDEQEDEQQQ  
QHFMMLTSLVQSHRQQQQGDRGNILSCSTTSPSDQRRHQNDGDSCCNGNSMQHFFEVE  
FM

>TaSPL22

MMSGGRMNAAAGDDFPFAAMQPPPYVGFEGHAGMVQAGGGGGGGG  
QRHHQGAMMYDNFDFAAAAAAFQFQDAPHHQMNGGGAGGLLPMAPPPMPGMQLQMPT  
MGMHGHGDVYPALGMVKREGGGGAGDAGRIGLNLGRRTYFSPGDMMAVDRLLMRSRLG  
GVFGLGFGGAHHQPPRCQAEGCKADLSGAKHYHRRHKVCEYHAKASLVAAAGKQQRFC  
QQCSRFHVLTEFDEAKRSCRKRLAEHNRRRRKPASSSTTATSKDSAPPSKKNP  
SSYAADNNNLSATKSTISSNTSAISCLQQHDQSKAAAAARPMTLTLGEPREKDDHQH  
LSNAMQLHHHHQEQQHFITSLLQQNNNGNGNSNILSCSSVCSGLPSAGAANGEVSDQ  
NNNSNHGGGNNNNNNMHLFEVDFM

>TaSPL23

MDSWEHKMPSWDLSTVVAPSGGGGGGGGGALDLKLGAPTSWRPV  
PAAAVASVQQQQPPPPSAAPAPAKRARAGQQQTVPVPCSVGCTADLSRCREYHRRH  
KVCEAHSKTPVVAVAGQQQRFCQQCSRFHLLGEFDEVKRSCRKRLDGHNRRRRKPPD  
PLNPAGLFANHHGTPS



Table S3. Genomic sequences of 17 barley SPL genes.

>HORVU0Hr1G039170.6 genomic sequence

ATTTCTCGGGCAAGGTCTGGTTGTAGTAGTACTATTATATTTATACAGTATGATTATTA  
CGCGTGACTAACTTTTAATAAAAACAAGTGAAAACAACAAGCAACAACCCTAGACTAGTA  
GAGTAGTAGGAAGGAACAGCTCCGTTTTGTTTCTAGACTAGGCTAGTGAATGCTTGCAA  
CTGCAAGCTTGCCACTAAGGAAAAGCCCAGAATACAAAATGATTTTCATTGATATCACGGC  
ACAAATGTGTGGCTCACGACCTGCCAAACAAGGAAACAACCTGTGGACTGTGGTCGGCTT  
GATTAGCTTTAGTGATGCGTGTGTTATTTTAACCTGTTGAGCCATGCAGAAAGGAAAGTGG  
TCAGCTAGGCCGGCTAGGGGCAACTTGTGTTTCTGATAAACATGCATGCCCCCTTCAGAC  
AGATAGCACTTGGCCAAGAAAATATTCTACTTATAAAAATCAGACGATCCCTCCCGTGTAG  
TATACGTACCAGTAGGAAAGAAGAAGAAAGGTAGTAGTAAAAAAACCAAACCTCCAATAA  
TTGTAGCACGACCCTTCCATGGCAGTGTTAAAGGCGAACATGGCCCGTCTCCATGCCTGT  
CAGGGATTGAATGGCTGCAACCCCAGCGACACAAATCATCTCTCTCCCTCTCTCCCTCTC  
TCGGCGCAAGTACTTGTACTGACAACACCCCAGCTTAGCTTGTATTGTTGGCCCATATCT  
TTGTTGCTCGTGGCACCCCTCCCCGGACATTGGACGGGCGCCATTGCTGCTGTTTTTATTT  
GACATCTTTTGTGGTGCGGCAATTAACCCACAGATCCAGCGCCCGCTACCGCTAGCCA  
GTAGCCAGTGGGTGGTATGGTAGCCTAGAGTAGAGAGTAGAGACGGTACTGCTGCCAGGC  
AGCCTCCTTGCAAAACAGCCACCCTCGGCAGCTCGGAATGAGAGGGACAGGGGTGAGAGC  
GAGGGGCGAGGCCGAGGCCAACACACAAGCACAAGCTCCAGACAGCGACCCGAGTTGCC  
TTTGCCTGTGGCTGTGTGGGTGTGTGGGAGATGAAAGCGAGGGCTCGGCCATAACTAGGG  
ATCGAGCTACTGCCAGCTAGCTGCTCCTGCTCGGCCTAGGCCTACGCCAACCGGGCTCA  
GCTGAGGCTGAGGCTGGCTTGCCTGTACGCGTCCGTGTCCTCCGCGCGCCGGCAGGGGG  
TGACTACGTGAGCGTGAGCGTGAGCGCGAGCGCGGCATGGACTGGGATCTCAAGATGCCG  
CCCGGCGCATGGGACCTCGCCGACCTGGAGAGCGACGCCGCGCCGGCGCCGGCCGGTGGC  
ATTGCTAATGCGGAGTGCTCCGTGGACCTGAAGCTCGGCGGGCTCGGCGAGTGCGGCGCT  
GCCCCGGACACCCGCGGCCTCGGCAAAGCGCCGGCCGAGGCGGCGGCGTCCGCCAGCGCG  
GCCAAGCGCCCGCGCGCGTTCGTCGGGAGGCGGCGCGGGGCAGCACCAGCAGTGCCCGTGC  
TGCGCGGTGGACGGGTGCAGGGCCGACCTGAGCAGGTGCCGCGACTACCATCGCCGCCAC  
AAGGTGTGCGAGGCGCACTCCAAGACCCCCGTCGTCACCGTCGCCGGCCGCGAGATGCGC  
TTCTGCCAACAGTGCAGCAGGTAATTGTTTCACCCGCCAATTCTCTTCCAACCACGCCAC  
CACCCGCCGCTTAGTAGGAGATGGAGCAAATCAAATCGTAGCTCTTCTTCTTTTTTCTT  
TTTTCGCATCATCATCTCTCTACACTTTGCTCATCCATCCCTTCGTCGTCGGTCCA  
CCGATCCATGATCAGATCGCTACCGTGACATTATATGGTTTCTTTTCCCTCTCTTTTTTC  
TTTTCTTTGTTTGAAGTTGAACACAATTCGGCATGTCTCGTATCGAGGATGCACTTGTTT  
ACCTTTCCCGCATCATGCCTGGCCTCTCGTTTGCTCCTGTCACCCTTTATCATGGCAGC  
TTGTGTTACCTGAATTATTGCGACGCTTTTTCTTTCCGTTTCGCCCCCCTCCTACCACC  
GCTTTTACGCTGCTCAGAGCTTGTGGACTGGAGCAATTTGCTCCTCCGTCAATTCCTAT  
CAGCACAGCTTTTGCCTGCTCAGGATCGCCCCACCCTTTCTGAATCCTGGCCCTATT  
CATGAGAGTTCAGCACTGCACAAAAGCTACGTACATTGGCTCTCCATCTGCCAAAGATC  
AAGATCGCACGGGCGCCAGATGATCATCAATCGATCAGCCTACTGAATCTGTCCCTGTC  
TCTGGTTTCCAATTGCCGCGTTAAATCTTTTCCCAAGGTCGGTTGTGTTGTGTGGTTTTT  
TCTCGGTGCGCAACACTGTTCTGATATCGGTTTCAGCAACGTGCCGCTCGTGATCGACG  
ATAACCCGGACGGACGGAAACGCTGATATGATTTGCCCGCGCCTCCTTTCCCTTTTCCA  
TGTGCAAACACTAGCTAGAAATAGTTGGATCCATGTGCATTTCTGTGGATTTCTGGCCGC  
GACAGCATGTTTTGTGTGGGTCTGGGACTGTCCATTACTTAAACATGGCAGGTATATCCG  
GCCTGCCTCATTCATCACGCGCCAAGAAGTGGCCTACCACCACCCGAGGCCTCTGTTTCA  
AACGAAAAGGCCATGCTAACTCCCAAACCTAGAAGGTTTATAGTACCACTACATAAGTGC  
TTACTACTGCAAAATACAGTGTGGACGAATCGAGGCATTTCCGTACGATAAGAGGAGGACC  
ATGCGTGCATGTTACAGTCCACGGATGCATGTATACTGTATTTTCTAAGCCGAGGTTGT  
CCAGGCTTGCAACCAGCTGAGGACCTGAAAGTTTTTCAATTTTATGTTTCATTAAGGTT  
TAATGGTTGTGCCAACTTTCGCAAAAATAAAAATAAAAATAAAAATGGTAGTGCCAACTGAACA

TGATCTATCCTAAATATAGGGCAACACCAACCCATATAGTGTGATCTAGTATTCTAGTGG  
TTCGGTTGATGACCACGAGAAAAATGAGATCTGTATAAGCTCTTGCATCCTGGTCAATTT  
GGAATTTGGACTTCATGGGAGCCCTTATAGCAAGTTCTTTTAATTAAGATAAACCATTTT  
TAAAAGTGCAGGGTGAGATCCTACTAATCATGTTAAAGTTTCATTGTCTACGACTCTAC  
GTTGTGGGAGAGCATTCTAGGTCATTTAAGTATCGTGCGGTCGTCCTCGGAAAAGGAAA  
ACAAGACGGGTATTATATCATGATAATATCTTACTTTTAAACGTTAGTGTGACGCGTACTA  
AATAACATATGAAAATTTGCTTATTTTTTCAGGTGCTTTGGGACCACTTGACTCTGTTTT  
TATTTGACTTCTACTTGTGCAATTATCATTTCGAAGATAGCTTCACTGTATTTGTCTACAT  
GTGTTAGCCATAAGACTGAGATAATCACATTCTATGAGCACAACACTAGTTGGATCAAATTT  
GTCACATTTTTTATTTAAGAAAAAATACAAGAAAGATTGAGGTGTCCATTTTTTAAATGT  
AGAATGTATATCCTCTAACCGBAACTTGAACCATCAGTATTATTGTTATTTTCGGATTCTA  
GTCTCTTGCAATTATTTCTTGCAATTTGTAATATTTTCGTATCTTGGTCCACTTTAAAGTAC  
AGTTGTGTTTATTCTCATTTTAATCTTGCTGAACAAAGTAGACGATTCTGTTCTATCTTT  
ACACCTTTACAACCTTGATAGGCTGCTAATGTGTTCCCTCTCATCTTTTATTGCCTTGATT  
CATGAATATCTTACCCAGTGGGGACAGTTTCCAATCATTGATTGATCCGGCAGTTAGTGC  
AGATTTTATAAATTAAGTGCGCACATTGTCCCAGCAAACCTTGCATGCTTCTATACATATG  
GTTTCAGACACACTATACTGTGGTCCATGTTCAACAGGCATTGCAATATTTTTGTCTGCC  
GTTGACAAATCTCAGGTACAATTTTTTTTTTGATAAAGAGGTACAATATTTTTATCTAAG  
ATAAAGGCCCAAGCACTGAAAGGAGTGATTGACAGATGAATTAAGTGGTCCCTTTGTGT  
ACTGTACATTATATATTTCCAACAGTATGCGTGAAGAATATTAAGTATTCTGACAGTATAT  
AGTTTGGTGATTTCAGCGAGAGCATATATTTATATTTTCGAAACACGTGCCTAACTACCTA  
GGAGCATCTTATCTTGTATAAAAATCATGCTAGGATAAAGGAATATCTTATTTAGTTTTCA  
ACAAAGACTAGCAATGTTGTCTCTCAGGACTTAAGAGCCAAGGAAAAAGCTACTTCCAT  
TAAAATCTTAGTTGGTGTGTTCTTTAATAAAGAAGGGAGCATGAGACCCAGCATTACA  
GAAAGCGTCAAGGATAACAGTGTGTTGTTAAGTTTTGGATAAATGTTCTAAGTTATGGAA  
CATTTTCCATTCTCATTTTGTTAACTCCCTATCAGATACTTGGGAGTTGATATTATCCCT  
TTATTTTTGACAGGAAAACCTTTGAGGTATTGCTTATTTCACTTCTTGTAGCGGTAGCTAT  
GCTTTTCGAAGTTGCTGGCAACACACAAAATTGACATGTTTGTATATCAACATTCAGCAT  
GTTATACAGTTTACTGTTTACGCACTGCATTAGCTTAATTTCCCTGGTGTGTTGGCCTGATA  
TTAATCCTTCATGCATAAGCAATGATTGGTGTCTTGATCATGAGTTTTATTTACTTAGGT  
TTCACCTGCTTACGGAGTTTGTATGAGGCCAAACGCAGCTGTAGAAAGCGTCTTGATGGGC  
ACAACCGTCGCCGAGGAAACCGCAGCCGGATCCGATGAATTTCTGCAAGTTTTATGACGA  
GTCAACAAGGTTACATTTTTTTACTACTGCTCTATATTTTAAACAGTTCATACATGATTGG  
AAATATGGAATTGTCTGTCAGACATATTGTAAATCATTACTCACCTAGCATGTTGACCTA  
TTGCATTGACCTTCAGTACCTTCCAGCTTGTAACCACCCCGTATAAATTTTCCACCAAGT  
TGCACATTTGAACCTTATTCAGCAGTTTTCTTCTATAAATTAGTCGCAAGTGGGATTAG  
TATTCAGAACGAACAAGGATAACACCTTAGTTACCCATATAACCTACCTAATTCATAAAG  
GCTGGATGAAGTGTAATAAATATAGAGTCAAAGTTTTAATTCATTAGGAAAAAAGCCAC  
TCTTTACCTTCTTACAGTACTTCCCTCCGTTCAAAAATACAAGATGTTTTGTATATTTT  
AATATGGATTACATACATACGGACGGAAATTAGTGAACAAACAAAGTAAAACGTGTCTAT  
ATATACATCGATTCACAAAAGGTTAGGACATCTTATATTTGTGAACGGAGGGAGTAGAG  
TCCTAGTGCCTGAAACACTCATATATTACTCCCTCCGTAAATAAATAAAGAGTGTTTAG  
ATCATTAAAGTAATGAAATGAAACACTCTTATATTTTTTTTACAGAGGGAGTAAATGTTA  
ATTTTTGATAATGCCTGAAGAAAGATTTTACTCATTCTATCTCCATACGTATCTGTAGCA  
TTTCCATTATCTTCTTACCACAACCAATTGACATTTTTTGCGAAACCCAGGAACAAGGTTT  
CCATCATTTCCAACTCCAAGACCGGAGCAAAACTGGCCAGGGATCATTAAAACCTGAGGAG  
AACCCCTATTACACACATCAGCTCCCTCTAGGCATCAGTAACAGGCATCATTTTGGTGGC  
TCTACATCTACTTTTCGCGAAAGAAGGACGGAGATTTCCCTTTCCCTACAGGAGGGCGAAATA  
AACTTTGCCACCGGTGTGGCACTTGAGCCTGCAGTGTGCCAGCCGCTGCTCAAGACGGTA  
GCTCCTCCCGAGAGCAGCAGCAGCAGCAAGATGTTCTCCGATGGTCTGACTCCGGTG  
CTCGACTCGGACTGTGCTCTCTCTCTTCTGTGCTCAGCTCCGGCAAATTCCTCCGGTATCGAT  
GTTGGCCAGATGGTCCAACAGACTGAACACATCCCCATTGCCAACCTCTGTTCTCCAAC

CTGCAGCAATTCAGCAGCTCGTCCTGGTTCTCGCGCACCCAGGCTTCCACCGGCACCGTC  
TCAGCGACCGGATTTTCCTGCCCGTGGTGGAAAATGAGCAGCTGAACAATGTCCTAACC  
TCGGACAACAATGACTTGAACATAAATGGGATTTTTCATGTTCGGAGGCGAAGGCTCCTCA  
GACGGCGCTCCGCCATCTCTGCCCTTCCCGTGGCAGTAGTTTTTCAGTGGCTGTTTCATGTG  
TTGCTTACAGTAGAGCGCATCTTTTCTCCCTAGTGATCAACATTTGCTTCTGTTCAATCT  
GAATCATTCTTTCACTTGTATTCTTTTACTTGCCAGCATTTCGTGTGAACAGATTCAGC  
ATAAATCAATTCTCGAAATCTTATGGTGTCAAGTGACAACTGTGGTACTTTTTTTTTTC  
TTAGAAAAGGAGGATAAGGAGCATGACCCCCGGCCTCTGCTTCTGAAAGATGCATGCAAT  
CACTTTATTAATTATTTATAAAGATCTTACAAAATAATATATCAGTGTGTCTCAAGCCAC  
CATCTTAACAACATAACGTCGCTACTCTTATTCATTGATGAAAGGGTGCTGAATGTCAGAG  
CCGAATACCAAACATATATCGCAACAAAGCCTAACATCTAAATACGGATGCCCTCACCAA  
GTCACATAACAGGTCTGGGGTCCAAGCAGATCTGACATACTCTCATAGGTCGTCGCTGCC  
GTCTTCCATCAATTCATCTTAAGAAAATGACTTCTATACCACTGAGGCAAGCATCAATTG  
CTCATTTGCCATCGAACAAAGCTCCACTGCTCATATAACCAGACACAAACGAATTCTAGTG  
CTTATTTGCCATCGCGGTTAGTCCATCATCAGAATCTCTACGTTTTCTGTTAGTCAATCT  
GAGAATTCCAGTTTTACCCTCGTCTTATCTCTTCTTTAGAAATAGAAAAAACCCAGAAGC  
AACACCACACCACCCGACCAGTTCACGCACGCACACAGCAGCGGCCATGGCGGAACCGCC  
GCCGCCGCCGCTCCCCAGCGCATGCCCTCCTCCCTCTCCCGCTCC

>HORVU7Hr1G051400.2 genomic sequence

AAATTAATGGACATCCAACGCATGCGGAGCCGAGAATGCATATCCAACGCATAATTTAAC  
CATTTCAATTTGATAGCTGACCACATTTGCCATGTGGTTGCTAAAGGGTGAAGTTATTTT  
TTAACCTTCTAGTCATGATATATAATTTTGAAGGATTTTTCGTTGATAAGCGATCATACT  
ACGCACACTAATAAGAAGTTGCTTTTCTTTAGCACTAAAGTTGCCTAAATATCATCCCAT  
AGTTGTTTAAAAAAATATTAATAATTTATCCATATGTGATCTAGTTTTGAAGAGCTCGTCG  
TAAGAAACACAACCGTAAAAACGGATAGTTGTTGTAAGGCTCGGTTCAAAGTCACTACTA  
TTTTTTAAATAAAATAAAGTAAAGTTGAATGACTTCCTGCATAGGGTGTTCTTGTTCCAA  
CTAAATAGTACAGCTACATTTTTTGGTATTTATAAAAATATATATTTGCGTACTCGTACT  
ACACGTGTCAGGCCAAGTACAATGATGAAGCAGGACGTAGTACCGTCCGGGGAGGCCCGT  
TCGCGCAGAGGATACGAGGCAGGCCAGGCAGCCAGCCACTGCGACGTACCGGCACCAGCA  
GGCAAAGCGACCCGAGAGGAGCGGGCAGGGGGCAAGGGGGGACGCACCCGCACCGCGGCA  
CGGACGCCGCGGTACGAGTACGAGTGGTGGTGCGGTTTGACAGGCCCCCGCCCCGAGAGC  
AGAGGGCCAGCAGCATCAGTCGTACTACCAGCGCCACTGCACCCGTGCCTATCGCCAACT  
CCCGCGATGCGGCCTCGCTCGCCCCAGCCAGCCAGACCCGCCCCGTACGGCCCCGCGGCGT  
GGGACGGCGGGGCGCCACCACCCACCCCGCGCGTTCCTTCCCTCTCGCCCCTGCCCCGC  
CTCCCCAATTACGCGCCCATTTGCCACGCCACGCCACGCCACGCCACGCGAACCCTCCCTC  
GCCCGCTACACGCTACGCTAGTTGAGCAGCTAATCCAACCCGAACCCCGTGCGCAGCTG  
CGCTCGCCCTCCCTCCCACCCGTCCCGTCTCTTCGCCTCGCCCCGATTCCTCCCCCTCC  
CACCCACACTCGGTCTTCGTCTCCCCGACCCCTCCCTCACCCCTCACGCCTCTCGCCA  
GCGCCGCGTCTCGCGTCCCGCCCGCGGTTTCCGCCATTTCTCCGGGCTGCTGCCACGC  
CCCGCGTCCGTTTTCTCCCCGCGGGGGCGAGATGAGGTGAGGCGGTTTTCTTCCGGGACT  
TCGCCGAGCTTCCGTGCGCGCAAAGGTAAGTACTACTAACAACCAACTGCTCCGATCGAAT  
CCCCCGTCCCGCTCGTCGGCGATCGTCGGTTTTGATCCGTGCCGCGGTGCTGGGCTGGC  
GCAGATCCGAAGGGACAGCCAGCCGGGTGTGCTAGGAAGCGCAGGACCGCGGGTGATGCA  
GAGGGAGGTGGGGCCGCAGGTGGCCTCCCCGCTGTACCTGCACCAGATCCAGCCGCTGCC  
TCCCCATGCGGCGGCGGCGGCCAGGAAGCGCGGGACCCCGTGGCCCCGCGCGGACCCGCC  
GGAGAACGCCGCGATGGGGGCCGGCGCCGCCGCGGAGGGAACTGGAACCCAGCATGTG  
GGACTGGGACAGCCGCGCCTTACCGCCAGGCCGTCTCCGACGCGCTCCGCCTCGGCGG  
CGGCCTGAACCACCAACACCACCAGCAGCCGCCGCCGCCGCCGCCGCCGCCGCCGCCGAC  
GGCTGCCGAGGCGCAGCGGCAGGGGCGCGGAGGTGCCGGTGACCTGAGCCTTCAGCTGAA  
CCTGCGGGAGGAGGCATCGATGGCGATGGATGTGAGCCCGACAACCTACCATGTCTTCTTC  
GCCTTCTCCGCTGCACGGACGTGCGAGGAGCAGGCTGCTAGGCCTAGCAAGAGGGTTCCG  
GTCTGGATCGCCCGAACTGCTTCTGGAGGAGGTGGCGGCGGCGGTGCCGGAGGGAGCGC

AAGCGGAGGCGGGAGCTATCCCATGTGCCAGGTGGATGACTGCCGCGGGATCTCACCAG  
CGCCAAGGATTATCACCGGAGGCACAAGGTGTGTGAGATCCACAGCAAGACAACCAAGGC  
GGTAGTTGCCAACCAGATGCAGCGCTTCTGCCAGCAGTGTAGTAGGTAATGATCGTGCCT  
GCAAACACCTCCTCAAAAATTTAGTGGCATGATTCTTTGTTATGATGCCACCTTTAGGG  
ATTTATGTCTCCTCATGATTTGAATGGTTTCTTAGTTTGTGTATTGGGCCATAGAAATGG  
TTTCTCTATCCAATGATGGCAGTGTTTATCTAGTTTCATACTGTATCATTTACCACGTCC  
GTTCCAAAATACAAGTCATTTTAGAGATTTCACTAAAGACTCCATACGGAGCAAAAATGAG  
TGAATCTACACTCTAAAGTATGTCTATATGCATCCGTATGTAGTCTGTAGTGAAATCCCT  
AAAAAACAACACTTAATAGAGTATTTAGGAACGGAGGGAGTAGTTACTAAAAGTCCATT  
CTTATGGTCAATCATTTAGATTTTCATCCACTCTCGGAGTTCGATGAGGGTAAGAGGAGTT  
GCAGGCGAAGGCTTGCCGGACACAACCGACGACGGAGGAAAACCCAGCCAACAGATGTTG  
CTTCACAGTTGCTGCTTCCCTGAAAACCAAGAAAACACAGCAAATAGGACACAGGATATTG  
TCAATCTGATCACTGTTATTGCACGCTTGCAAGGTACTTGACTCCTACTGAACTTGGTAC  
ACTCTTTCACTACTTGTGATTTTAACTGAGTACTATTTTTCTGTCTCTGCATCGACA  
GGTGGTAATGTTGGTAAACTACCCAGCATCCCTCCGATACCGGATAAAGATAATCTGGTC  
CAAATCATAAGCAAAATAAACTCTATCAATAATGCAAACCTCCCTGGGGAAGTCTCCTCCA  
TCAGAAGCCATTGATTTGAATGCCTCCCATGGGCAACAACAAGATTCCCCTGTTCAAAT  
GCAACAAGGTGGTCGACAAGCAGACTGTGCCATCAACCATGGATTTGTTAACAGTTCTA  
TCCGGTGCTCTTGGGACATCAACCCCTGAAACCAATACATCTCAGTCCCAAGGGAGCAGT  
GATAGCAGTGGTAATAACAAGAGCAAGAGTCATTCAACAGAGCCAGCTTGTGTTGTAAT  
TCCCATGAGAAATCAATTCGACCTTTTCCGGCAGCTGGTGTGATAAGGAGCAATAGCACC  
CATGGAAGTCCACCTGAAATATATAAGCAGCCAGACCGAGATAACCCATCCATACTTGTCA  
CTGCAGTTGTTTGGTAATGCCGAGGTGGACATTCTGTAAATGGACACTGCAAATAAG  
TACTTGTCTTCGGAGAGCAGTAATCCTATGGACGAGAGATCTCCTTCATCCTCTCCACCT  
GTAACGCGCACATTTTTCCCCACCCGCTCAGTAAATGAAGGCATCAGACATCCTCGTATT  
GCTGACTATGGAGAAGACGCTGCAACAGCTGAGATCAGTACCACTCGGGCATGGTGTGCA  
CCACAGCTTGAGCTTTTCAAGGATTCAGAACGGCCAACGGAAAATGGGTCCACCACCAAC  
CCCACATATCAGTCATGTTATGCCTCAACATCTGGTTCAGACCATTCTCCGTCAACATCA  
AATTCAGATGGACAGGTAATTTATATCAAAGCTTGCCATTTAGTTGATTATGTCACAAG  
CCAAGGTGTCATTTATTATTTTAGCCACGCTTCAATCTGATCCGCACATGATTTTCTAT  
TTCATAGGACCGTACTGGAAAGATTATATTCAAGCTCTTTGGCAAGGAACCTGGCTCAAT  
CCCTGGGAACCTTCGTGACGAGGTATGACCACGAACTGTGCCAACATGGTAACTGGAAG  
GCACTCTTCAGCGTATTTCAATCACCATATAAATAAATGTTTCTCCTTCCTTGCTCAG  
GTTGTAAATTGGCTGAAACACAGCCCCACTGAAATGGAGGGCTACATTCGCCCTGGTTGC  
CTTGTAATCATCCATGTATCTGTCAATGCCAACTATTGCATGGGATGAAGTAAGTCTGCTG  
CTACACTAACAAAACCGATTGCATGCAATGAAATTCTTGCAAATTTATCTAACGTTGTAT  
GATTTTTAATGCAGCTTGAAGAGAATTTTCTCCAGCGAGTAACTCGTTAGTTCAGGCTT  
CTGATTTGGATTTCTGGAGAAAAGGGAGGTTTTTAGTTGGAAGTGACAACCAGTTGGTGT  
CGTACAAAGATGGTATACATAACTACCATCTCTGTGTTCTTCTCTATTCTGCTCACTCT  
TTGGTGGGTTGACTATGAATTCGTTTTGGTTGATATCAAATTTGTATTTAGGAATGACC  
CGCCTGTCAAATCATGGAGAACATGGAATACTCCCGAGTTGACCCTTGTGACACCAATT  
GCTGTTGTTGGTGGGAGAAAGACCTCCCTCGTTCTTAAGGGCCGTAATCTAACGATCCCG  
GGCACCCAGTAAGTTCCTGCTGTGAAATAGTTTCTGACCGGGAGGATTATTGTGAATGT  
TTTGTGCTTGACCACTGACTCTGAATCTATGCAGGATCCACTGTACCAGTGGAGGGAAGT  
ATATATCAAAGAGGTATTATGTTTCAGCGTATCCGGGTAATATATGATGATTCAGGAG  
TTGAGACCTTTGACTTGCCGGGAGAACCAATCTTACTCTTGGGCGTTGCTTTATTGAGG  
TTTGTACTTTGTACCTATGCGGTTGCTCTAGATATGTAAAGATTACTATAGTTAGCACTA  
GGAAGGTGATTACAACATGAATGTTACATACGTGCAGGTTGAGAACAGGTTTCAGGGGAAA  
CAGCTTCCCTGTTATTTTTGCGAGTAAAAGCATCTGTACAGGTTAAGAAACCTTGAAGC  
TGAACCTGAAGATTCGCGGTTTCTGATGTCTCTTCAGATGATCAGGTCCATGATGCTAG  
GCGGCTAAAGCCAAGGGATCAAGTTCTGCATTTTCTTAATGAACTTGGCTGGCTTTTCA  
GAAGGCCGCTGCATGCACACCTCCATCGAATCAGATGTTTCTGATTCAGAGTTGATTCA



GTTCTCTACTGCACGGTTCAGACACCTTCTGTTGTTTTCAAATGAGCGGGACTGGTGCTC  
TCTCACTAAAACACTACTCGAAGTTCTTTCCAAGAGAAGTTTGGTCAGTGAGGAGCTATC  
ACAAGAGACTCTGGAGATGCTCTCTGAGATTCATCTTCTGAACAGGGCAGTGAAAAGGAA  
GAGTAGCCACATGGTGCAATTTGCTTGTGCAGTTTGTGCGTAATTTGCCCTGACAACCTCAA  
ACTGTACCCTTTCCCTTCAAATTATCCCGGCCAGGTGGTTTACTCCATTACATCTAGC  
TGCATCCATTGATGATGCAGAGGATATAGTTGATGCCTTGACAGATGATCCTCAACAGGT  
AAGCCCCGTATAGTTTAACTTTCTTTATCATAGTTATTTACATTGATAACTCTTCTGA  
TTTTTCTGCTTAAATTAAGTGCAGATTGGTTTGTGAGCTGCTGGCATTTCGGTGTAGATGATG  
AAGGGATATCTCCTGAAGTGTATGCGAAGTTCAGGAACAACGGCTCATAACAATGAACTTG  
TTGCGCGAAAGCTTGTGGACAGGAAGAATAGCCAGGTACCATTGTGCTCAACAAAGGGG  
AAATTCATATGGATCAACCAGAGAATGCTGGTGCGAATAATTCATCTGGGATCCAAGCAT  
TGGAATAAAGATCCTGCAGCCAGTGCGCCATTTTGGAGTCTGGCTTGCTAAGACGCCCTA  
TGCGTTCTCGAGGATTGCTTGCCTCGCCCTATATCCATTCAATGCTTGCCATAGCAGCAG  
TGTGTGTCTGTGTCTGTGTATTTCATGCGAGCTTTGCTGCGGTTTAATTCTGGTAGGACCT  
TCAAGTGGGAGAGGTTGGATTTTGGTCCCACCTAGACATTGGAGAATGCCGTATTACTTA  
GCTGTGTGATGTTATTAAGGAACTACCTTACAAGAACCAGAGGGTGTGGAACCAGATTGC  
TTTTAACTGCTCCACTTTCCATGGAATTCTGTCCATGGTTATGGATGGTGAAATGTAATA  
GTTGCATGGATAAAACCTTGCCGGAAGAAAGTGTGGTATGTGGGGATAGTCATCAGCTT  
CTAAGGGGAGAGTTGAGAATCAAGAAAAGGGGGGCCTGCCAAAAGAAAAACTTGGGCAGA  
GTTGGCACATAGTTTTGTGATGAGGGAGGAAGCTACCAGAGCTTTGTCAATGTCAGGAGC  
AATAAGACAGAGGCAACAATAGTTCTGTGGTTAATCAGTAAGTAACCCTTTGATTTCTTT  
TTGCTGGTGTAAGTGTGAATCTGCTGTTTCATGTATCATAAGATGGTATTTATTTATCTT  
GGTCTTTTGTGTTACTAAATCTTTTTTTTGTTTACCAAATACAGTGCTTACTGTTTTGTC  
TTGTGTTTAGACGGTAGCAGGGGTATAAATGGTCGATAGTGTGTCAGTAGCTAAATAGGAAT  
GAGGCAGACTTACATGTGTATCCGGATCTATTTGGTTTATTGGATTACCATCAACAACTC  
TCCAGTTCCCGTTTTGATAGAAAGCCTGGGTGTCTATCTTTCTTTCTTTCTGCGTGCA  
TCTTCTTGTTAAATATGCAATGCCAGTTATGCTGATTCGCTTCCCTGTTTTGATTGAAAG  
CTACGTGAAAACAGTGTTGCAACTATGCCATGCCTGTGGTGGGGCATCTGCATCTGGGCG  
TAAAAAGGCTGTAGCCTAGGCGTTGTGCTGTGTTATCCTTGCGGGCGCGGGGGGCTCGTG  
ATGCGAATGAGATGCCGGCCGGCGCTTTTCCGGATCGCGCCGTGTGCGGATCGCCGGGCG  
GACACGCCGGCCAGATTCCGGCGAAGCTGGCACGCCCCGGGCGGGCAGAAGCCGGACCCA  
GACGCGTGATCTGCACAGCACGCGCGGTAGGAAACGATGCCTTTCCCTGGCCCGGGGGCG  
CATGTGTGCGTTCCACGGCCGGAGTCGCGCGGCCTATGGCTTTCGTCCCTCCTCCCTTT  
GTCCATCCCACATGCCTCTCGGTCTCGGATTGTACGCTTGTCTCCAGCCACTCACACAT  
GCAGCCACGATCGCATCTCTCGCCTACAGCGATGGCACGCGAGTGCCGCCGTCCGTCCGTC  
CGTCCGTCCCTCATCGATTGCTCCGCCAGCCTTGATCGGCCGCTTTACGCACGACGTCTA  
GTGGCGGCCTAGCTGCTACTGGCACAGCATCAGCATGTGAGCGCCCCTCTTTCCAGCCTC  
TCTCGCCCACGCTCACCGTTTCG

>HORVU5Hr1G076380 genomic sequence

NNNNNNNNNNNNNNNNNNNNNNNNNNNNNNNNNNNNNNNNNNNNNNNNNNNNNNNNCCCTT  
TATATAGTGGAGGAAAATATCTAAATGTTATCCCCACTCACAGCCCAGCAAACCGATAC  
TAGCGCTGCTAGGAGCGGTACTATCGCTTCTAGGAGCGGTACTACCGCACGGTAGATCCA  
CCAACCAGAGAAGTAAAAAATTACTTCCGTACCTACCACCGCTGAGGGTGCGTTTGTGC  
AAAAGTCCGAGAGAGCGGTAGTAAAAAACTACTACCGCCACAGAGCGGTACTACTATTG  
CACCTGCGGTACAACCGCTCGCACTTTGCACAAACAGGGGAAACAAGGTGGAGCTCCATT  
GAAGCGAGGGAAAGATGGTGCAAAGAACAGATGTGTACGTGTTGATTCCACCCTAATCT  
TTCCGAAGTGGCCCCCTCTTAATAGTACGGCTTTTCTATGATTTAAATTCACCAAAAAGA  
AACGTAGAAAACAGCCGTCTTTGATAGACTCCGAGGGGGCAGTGAACCGTCTTGTGCCTAG  
ACATGAATTATCTGAAATGCTCAATACACACGATTAGTCGCACACGCATTGTCATCAATC  
GCTAAAATCATTTAGAGAGAAATATGCCCTAACATTAGTTATTTAATTATTTTCCATGTG  
ATTTATGTCACTATTCATCGGATTTTCATTGTTTCATTTTGGGTTCTTTTGCTTTTCAT  
TTTTGTTACTTTGCTTATYTTTMTRTGTGTTTTCTTTGGTGTCTTCAATTTTCATTGGA

ATTTGTTCCCTTTTATGTTTTNNNNNNNNNNNNNNNNNNNNNNNNNNNNNNNNNNNNNNNNNNNNNNNNNNNNNNNNNNNNNN  
NNNNNNNNNNNNNNNNNNNNNNNNNNNNNNNNNNNNNNNNNNNNNNNNNNNNNNNNNNNNNNNNNNNNNNNNNNNNNNNNNN  
TCGTGCGCGGTGGACGGCTGCAAGGCCGACCTGAGCAAGTGCCGCGACTACCACCGGCGG  
CACAAGGTGTGCGAGGCGCACTCCAAGACGCCCTCGTCGTCGTCGCCGGCCGCGAGATG  
CGCTTCTGCCAGCAGTGCAGCAGGTAACCAACAATCACCCGCCAAAACCTGCAAAAAATTC  
CCTCATTCCCATCCATCTCATATCAGCAACCAATCCTCCTTGACTGTGACACCGGTGAAA  
GAAAAGAACACCATTGCTTGCTTGAAGTGTGCGCATGAAAATACTTGCTGCATGAGAAGA  
ACTGTCTGATTGGCCTCACCAGTCATTTCTTTCACACACGCATTTTTTTTCTCCTTTTTTA  
CCGCTGATCGTCGTTTCTTTTTTAAAAGGCTGAAAAGGCCCTGGCTGAAACTAACCAGT  
TGCTCCAGTCCAAGCAAGGAGGGCTACTGAATGAGCTGAGCATATCTCACTGTTCTTAC  
AAGGATGCACCAGTAACTTTTCTTTATCCGGCACTAACTTTTTCAGCCTTTCCATATGGA  
TCAAGTACCCCCATGTTTTTACTTTGGGCAACCAGTTGCATACCTGATTACATAACCCT  
CCCATTTTCCCGCTTTTGCACCAGTAACTTTCTAGCCACGGGTGTGAATTATTACCAGC  
GAAAAGTGGCTGATGCACTCCATGTGCCAAAGATCAGCTGCACCAGTCCTTTTTTATGATT  
TGCTAGCTGCCACATTTTCAAACCTGCCCTTGGATTCTCCCTTTTCTGAATTATTATTT  
TTGGCTCTGGTTTGAAGCTCAAGAGTGGAGCATAATTTCTGACATTGACAAATATGTTAC  
TGCGACTTTCATTCTGGCAAACAAAAATCACACAGATTTTCCATGACATTGACAAAGA  
TGTCACTACTGCTTTTATTCTGGCTAAAGAAAACAGGCCAATGCTCTGCTGGGGAGTCC  
CCAGAAAAATCATCACATATTTTAAACCAACTAGTAGGGAGACAAGAGGGTTAATCTGTG  
TTAACCAAGCCACTGTAAACCGTAGGTTACTCTAGGATGAACCCATTTTACCCTTGAGGT  
GGTTTATGTCTGACAAGACTGCCCCCGTTGCTGAATTAGTAGTAAAACCACCAGATCCA  
TGCGAATTCTTTGGGTTTACTCGTGGGGTTATTGTGTGCAGCAGTTTTTGTGTGTGGGG  
ACTGTTCACTCCTTAAAGATGTTGCTCAACACATGACCTGTTTTATTAATTTCTTGGCCT  
ACCCCATCTGCCATGACCGCATCATGCTTACTAGCCTTGTTTTCTTCCACATGAGATGCC  
GGACCACCGGAGCGAATTGTCGAAACAAATACGATCCACATCTTGCATTTTGGTGGAGC  
CGTTGTCTCCGAATTGAATTTTTTTGGGTTTTCTGGTTAGCTGAATCATTGGAGCCCAA  
CAAAAGCCAACCGGCTCCTGAAAATTCAAGGAATACAAAACCACCCGTCAATCATTTGG  
TCGTCTTCTCCCGATAAAAGATTGAAAATTTTCAGTTGGGACGCGTTCGCAATGATTGGG  
CGCCCATCAGGCACACGATCAGGCAATAGTGCGCCGGGTGGAGCGAAATTTGGATCACCA  
CGCTGTGCTCCATCAGTGTTTCTACATACTACTTACATACAGGCTGGTGCCGCACTGACA  
TACGCTGTTGGAACCTATGCCGTGGTCCAAATGCCAACAGGAGTAGCACTAATTTGCA  
GCGCTTTGCAGGCCAGTAGAAAACCTTTTTGTAAAGCCAAGCCACCCCATGCACTCA  
GCTTTGTTAACTGACGCATTGAAACCCGAGTGGTCCAGCTGCTCGTGTGTGTGTACTC  
TTTTCTTGGTTCGAATCTGTGTTCTGTTTTAATGTTTGGCAACAAACAAGTATCCGGACCA  
TTCTGTTTGGAGTGCCGTGTTGGTCCATGTAGTTTTTGATTATGAGTTACTCATATATGAT  
ATGCGTACGATCAATACAGCAGCTTATATTCACCGTTATTGGTCCATGATGGCACCATGG  
CGGGTTATCATGCCATTGTAGCACTTTCCTGTATTATGAGAGTAATGCTTTTTATTTCTT  
ATAACAAGGTTATGCGACGTTGTATTCGCATGGTCTTCAAGTGTGTTCTGATTTCTGCTC  
TTCACGTTATTACAATCATGTGTGTTTGGTATGTCATCAACAGTTTCAGTAGATACTGAT  
TAGTACACACTCATATATGGTTAGCTCTTCCCTTTCGTACTCCTTTGCACGTAGATGTCCAT  
CTTTCTTATCGTGAATCTCTTATTCCATAGGTTCCACATGCTTGCCGAGTTTGATGAGGC  
TAAGCGTAGCTGCAGAAAGCGCCTTGATGGGCACAATCGACGCCGCAGGAAGCCACAGGT  
AGATAGCATGAATCTGGGAGCTTCATGACAACCCAACAAGGTAATCTTCTGTCTAACT  
ACCTCTTTTTTATTACCATGTTGGTTGCTACTATTATACATAGCTAAAATAAACAAAATC  
ATATAGTAACCGCAGAACCAGAACTTCGGTTATAAAAATACATCAATTCAAATGCAAACC  
CTCACAAAATGCTCATGTTACCTGTAGTTGTTTCGTACATCTTTCGTGCAAACTAAGGT  
TTCATAATTTTGGTGGGGCATGATTTCTCTTGTATAACCTATAACAAGCTTGACCTGCAT  
TTTGCATGGAGCTACGGCCGTTTTTCTATAAGGACGAAAGTTGGCATAAACATGCTGCTC  
TGTGTTTAATTATGTTTAAATCATGGGTTTATGGTATAAATGAAATGCGGGATGTACTGTT  
CTTCAGTAGCCACAAGAGCACATTGTAACCTGAGCATTCAAATGAACAGGCTGAGTGCAC  
AATGCTGCATTTTCAGTCTTTTACGTTGCTGCTACGTATGTTTGAATACTGTACTATTTG  
TCTGATGCTCGGTCGTTTTCATGGCGGCCGTTTCAAGTTTGTATTCAAATGCAGGGACAAGG

TTCGCGTCCTTCTCGGCTCCAAGGCCGGAGCCAAGCTGGTCCGGGATCATCAAATCCGAG  
GACAGCAATCCATTCTACAGCACGCACCAGGTTAACTTCGGCGGCCACGTCGTCATAC  
TCCAAAGAAGGCCGGCGCTTCCCCTTCTCCACGAAGGAGACCAGATGAGCTTCAGCACC  
GGCGCGCCAGCACTCGAGATCCCCGTGTGCCAGCCTCTCCTCAAGGCCGTGCCCCGCTG  
CCGCCGCCGCCGAGAGCAGCAGCAACAAGATGTTCTCCGATGGACAGTTGACGCAC  
GTGCTCGACTCCGACTGTGCTCTCTCTTCTGTTCATCCCCGGCCAACCTCCTCCAGCGTC  
GACGTCAGCCGGATGGTCCGTCCAAGCGAGCACGTCCCCTCGGTCCCAGCCTGCAGTTC  
GGCACCTCCTCCTGGTTTCGCTGCTCCCAGGCCTCAAGCGGCGGGCGGCCACCGGATTC  
GCCGCCACCTTCCCCGGCGGCATGGACGGCGAGCAGCTCAACGCCGGCGGGCGCGCTGGTC  
CCCCGGTCCAACGACAACGAGATGAACTGCCACGGGATCTTCCACGTCGGCGCCGATGGC  
TCCTCCGAGGGCACGTCGCCGTCCCTCCCGTTCTCATGGCAGTAGGAGTCTCGAGTGAAG  
ATCAGAGGCTGTTCTTGGGTTCTTTTGGTGATCAGTAGGCAGTAGCTAGCTGTGCCCTT  
TTAGTGATCAGGCCTACGTCCCCTTCTTTCTGTGTTTATTCTCTCTCCTTTTACGTTTC  
TATGTCTTGGACTTGATCTCTCGCTATCAGAATGAATAACTTTGCATGATTCAGAGGGAA  
ATCGTATACGTACTTCTGAATTTCACTGATGCATTGGAGACTAGATTTAGACAGCCTTGT  
CTTTCCTTTGTGCAAGATGCAAGAACGATTCGCCTCAGGACTATTATTTTGTTCATATA  
TAGTTTCAAAGCTTTTAAATCTGGATTCAAAAAGAAAAATGTAAGTTCTAAATAG  
TTCACCTCCCATTAAGAAAGATTCATATAATGTAAATTTTGTAAATTTGTGAACAA  
AATGCCATATCATCCATGATCAACACATTTAAACAAATGTTACGCATTTAAAAATATG  
TTTTTGACATTGTAAAAAATGTCCACACAATTTTTTAAATCTTAGTACAATTTAACAAAA  
TGTACACATGTTTACCAATATGTTTCGTGAGATTTCAAGAAATATTCATGATAATGCAAAA  
ACAAAATCTCACAATTCGTAAAAGATGTTCTTACCATTGAAAAAATTATCAAGACATA  
AAGAAATTTCCGCGTGTTTGAAATATGTTTCATTACATTATAATTTTTTTTATAAAGTGT  
AAAATTTGTTACATGAATTTAGAAAAATGTTTACATAACATATACAAAAATGTTGGTTC  
ATCTACAAAAATTATAGCACTTAGAATATATTTGCAGTTTTTAAAAAATGTTCAA

>HORVU6Hr1G031450.6 genomic sequence

ACCGACACGCTACTCGTCTTGTCCAAACTCAAGTCATGAGTGGCGAAGAGGTAGAACACA  
AAACACACATGCCACATTACAACCTATATCTGAACACCTCGGAGCACGGCAAAATCTTCAA  
ACCAAAGTAGATCAACACACCCTCCACGCATAGTGCCTAGGAGATCGACAAATGGACAAT  
ATGAGCTAGCCTATCGAAACATCACAATGAGTGCCAGGAGATCGACAAGTAGACAACA  
TGAGTAAACCTATCTTGCAGAAACACCGCAAATGAAGCGTCAATGATGAAGTACCTAGCA  
TCCCGGATGTGCATACCAACAACAATAACCAACGCATGATAACACGGTGCCCCGAGCCTC  
CCCACCAAGGCAAACGAGGCACCACTAGGTGATCCTCCATGAGACATCCTGAGCACTC  
AAGCCGTGTGTCCAAGGATAGAATGTTAATGTTAATAATACTTTGTTTTATAGTAAAAGT  
TATTTTTAATTAGATAAAGCATCAAATATAGGTTTGAAAAATGCACAAGCTGTCTCCAGC  
TATCCACAATCCACTTATGGCAAGCCAAGCATAGAAAAATGGTGGGAAAGAACAAGAAAG  
GGAAAAATGAGAGAGAGAGGGGACCGAACACTAAAAAAGACCTGCCTTTTCTATTCCAAG  
TCTCTTCCCCCATCCCTGCTTCTTCTTCTCCTGCACAGTCCACACTGTTTCATCTCC  
TCTTCGATCCCCAAATCCCAAGCTGACCAACCAAGCCCCCGCCCCGCATGGAGTGGACGG  
CCCCGAAGTCCACCCCGTCTCCCCGCCACCTCCTCTGGGACTGGGGCGACGCCGCCG  
CGCTGGGCTCCTCCGGCGAGGCGGGCGGGGAGGCGCGGGAAGGAGAAGCGGGCCAGGGGGG  
AGGGGGCCGGCGGAGGAGGCGGAGGAGGGGGCGTAAGGTGCCAGGTGGAGGGCTGTGGGA  
CCGAGCTCGCCGCCGGAAGGAGTACCACCGGAAGCACCGGGTCTGCGAGGCCACACCA  
AGTCCCCCGCGTCGTCGTCGCCGGCCAGGAGCGCCGCTTCTGCCAGCAGTGCAGCCGGT  
GGGTGTTTCTTGACGCCCGAGGTTGTTTCGCCGAGTTTTGTTTCTGCACCCTGGTTGCT  
CGCCGGAGCCGTTCTTTTCTTTGACTTCAGCGATTGCTCCCCCTCTTTCTATCACTCTGC  
AAAGCTGCACGGTCGCACCTTTCCGCGATTGCTCTTTTGTCTCCACTCCGTGCGTGTGCGT  
GTCTTTCGTTCTTGGAATTTCCGGAAACAGGAGATTCGACAAGCCGTCTATCTGCGAATT  
CTGCACTTCTTATAGACCATGATGCCGTGCTCTAGTTCCGTTCTCCGCCAGTTGATTAA  
TCCGAAACCTTGTGTTTTCTGTGTGTGCCGAAACTGTGGTTATCCTGTGCGAGTACGG  
TCTGTTTCCGATTTGGGAGGCGAAGATGCCTTTTCGCCACAATTATAGTACTGTCGACC  
TGTGGAGAATCGTGCTGCATGGCATGGCTGAACGGCTGTGCAATACCTGTTTCTGTTTT

GGCAGGGCGCTTGTCCCGTGCGCGTGCACCTTTTAGGCTGAAATTCTCTTGTGCTGTGGCT  
ACTGTGATCCAGTTACTGTGAAGATTTCTCTTCTGTGTATATACTCTTAGATCTTAGT  
TACTACATATATATGGGTAGTCTATACTACTCGTATGTACTAGTACTGTCTGTGGTTT  
TGCTGATTGCATGGCTTTTGGTGATCAAGGTTCCATGGGCTGTCGGAGTTCGACCAGAAG  
AAGAGGAGCTGCCGGAGGCGACTGTCTGATCACAATGCTCGGCCGCCGGAAGCCACAGCCG  
GATGCATTCTCCTTTGCACCGGCAAGGCTACCGTTCGTCATTGATGTTTGGTAATTTATCC  
ATACTTTTAGTGGGTAATTATGCGAGATTTGTATTATTTTTCCTTACTCTCCTCATAGCT  
CTGAAACTACTGCTCTTTTATGCTTAATGATTGGCTGGTTGTGAGTTGAACTTCTTTAAT  
AAATTGTGTTTGGGCTAGGGATGAGTTTTGGCTTTCATTAATAACCATGATTAGTCAAAT  
TTATCTTCAATAGTTGATATATGAGATGATAGCTAGTCGGTTGAATTATTTTGTCTTTCT  
TGTACTTTTATCAATAAATGCTTTTGCCATTGTGCATTACAGATGATAGACGACAAATAA  
GTTTTGTCTGGGATAAAGATCCACTTAGCCATGGAAGGCCTTTCCCATGTTCTCCATGGG  
ACAGCCCATCTGACTTCAAGCCCCACAAGTGAAGGAAATAAGAGAAGTGTCAATCAATG  
GACAAGTTCATTTTGATAAATCTCATCTACCCAATGCTGTTCCAGCACTGAGTCATGACA  
TAGCTGAGCTGCTACCAATGAAAGGTATGATTTGTCAATCATTTTGTAGCTATCACAGAA  
ATGTTCTCATCGATGAAGAAGCTGGCACATTTATTACGGGAAAAATGATACATCTGTAAT  
GTAGGCCTCTTTGATTCATGGGAAAGTACAAAGTAGGATTGCAGTGCCATGTCATCTTGA  
ATCCCACAGGATTGAAGGATGTTTGGTTGCACATAGAAAATAATAATACAGGAATCATCC  
CAACTGGTTTTAGTCAATTGATTTTTTTAGAAAGGGAGTACAGAAAATCTGTAGGAAAAAT  
TCATGTGGGTTACAATCCTACAAGTTGAACAACGAGCATAGGAAAAGTTCTTTAGGATGA  
CAAACGTATTGAATATCTATGAAAATCCTTGAATCGAAGAGAGCAAACCTCTGGTCCTCTG  
CTTGGCAAAGTCGTCACTGTAAAAATGTGGTTCCGGTCCACCCACTCAAACCGAGGGAGA  
TTCTTTTTTGGCCTTCACTCAATCTCTAACATGTATATCTTACATTACAAAGCTTACTTT  
CAACTCCTGCTGTTACGAACATTTATAGTTTCCAACAGTGGAAATGTGTCCCAATGAAA  
AAATGTCATCATTGTTAGTCTTGGTTCCAAAGCCATGATGGCTCTATGTTTAGGAATCAG  
GATAAATAATCATTGTAGATTAATAAACTGTACTGATACAGAAAAAGAAGGTTTTATGC  
TAGATTGTGTGGCAAATTTGTGTTTTGTGGAGTTTTCAGCCTGAGGTGATTTGGCTTAAT  
TTGTTTTTCAGTATTGACATATACTAGTTTTCTGTACCTACATATAAACTTCAGTATGC  
AACACTTGAATATATGTAGTTATATCAAATGTCCTACTTACGACATGATTAATCAGTTA  
ATCACTACTATGAGTTTCCGTTGGAACAACCTTGCACCTTACATTGCACTGGATTAAGTGG  
CTTCAGTCTTCAGGTATAGCTGAAATAGCAAATGATTTGTCCTACTTACGACATGATTA  
TCAGTTAATCACTACTATGAGTTTCCGTTGGAACAACCTTGCACCTTACATTGCACTGGAT  
AATTGGACTTCAGTCTTCAGGTATAACTGAAAAAGCAATGATAAATTGATAAATTCCTATG  
ATACCAAATTTTGTATAACAACACCACACATTTGGAGCTACAATCAATTGCAAACCTG  
TGGTTATACAGCTATGTAATGCATACAGAGTGTTATCAAATAGCTGATGTTTAAGATTCA  
AATGTCTGTCCTGTCCCATTTGAAAAAGTGCATGTCAATACCAAAGTGAACCTCCTAAATT  
CACGTTGGTATGTCCATTCTCTAAGGTCCTTAACAGTGGGTAATGAACTGTTGAGTTTCA  
TGCTTCAAACAGTTAAAACCTAAAGCTTAAGCTGATGAGGAAAGGTGGGCAATATACTCA  
CAATTCAACATGGAGGACTAGTTATATATAATCAAATATGCTGCAGTTTGCTTGTCAACA  
ATACTACTTAATTGTTCTCGATTGAAGTATATCTCAAATGCATATGAGCCACATGATGTT  
CGTTCACCTTTGCAGATATCTCTGCTCCCAACACTTGGATGTTCTTGAGTGCCCACTT  
TGGTGATGGAATCCTTTTGTATTGACCGATTGATCAATTTCTGTAGGTCCGGACGCATCTG  
CAACCGCTTCGAAATTAGGTGGAGCACCGGATCTTCAGCGTGCTCTCTCTCTTCTGTGAG  
CTAGTTCTTGTGGATTACCTGATCCAGTACAGCAAGCATCTTGTCTCGTCCAATTCCTG  
GTGCCAGCCAAAACAGCCGGGGTCTGCCTTACCACATGGAGGGAGCCCTCCGTCCGGCAT  
CCTGTGCCGAGGGACAGCCCATGGCTCCATCACCTCAGTTCGTCCGTTTACGATGGATG  
GCGCCAGCAGTGGCTATGAATCCACTTTCTTCGGCGTAAACCGGATGAATTGATACGCGA  
GACGTATGCGCCACTGTGTGATTTGGATCTACGGCATGGAAGAGCTTATGCAAGAAGTGC  
TCCCGTCAACTACTAGAGTGGAAAATCTCACTGTTTATGTTACCTACCTACATACTCATT  
GGTTACCTTGTGTTTTTCCGATGTACAACCCTGCCGCCGATTGTTGGCTCGTTTTGTAAAC  
CATTGTTGATGGATCTGGACACAATTTGTCTCATCAAGTGTGACTTTGTATATTTTCTT  
GTCCCTGACAAGCCATTTGCACAAGTAATCTCCATTACTAATTTGTGGCGATTTTTTTTTC

CTTTGCTGCTGTAGCAAGGACGATATGATTTTCATGTTTGTATGAAGAAAACACGAGGAT  
TTCAAAGACGATATTGCGGCGATATTTGCACTAATAATCTCCATGATTTGCTGTTGTATC  
GTAAATGATATGATTTTCATATTTGTTATGCGGATAACACCAATTCGTTTTATCGTGCAGG  
CAGAAGAGAACAGTCGAATTTGACTTGCCTGCAATTTAAACTATTTTCTTTCTTTCTGT  
GAACGTGCACACACATAACATAAAGAACAGACTAATCATAACAATACCAGGTAAAGAAAGC  
GATCTTGTCTCCTCAAAGCAAACAATCCAAACAGCTTGTAGGACACACAAGATGTAGAA  
ACCAGTCGTCATCACAGTTGTCTCCAATATAAATCAGCTTGAATCAGACCAGTATGTGGC  
TGATGTTGAGGCAGAACAGCCAGGGCAAGCCACTATACTATACAGCTCAACAAGATGTGA  
TTTCCAAAACGAAACCACCAGCTGGATTGCTCATATGTTAAAGTGTGCGCCATGATTATCA  
TAAACTTTGGATCAAGTGACAGTGATTGATCCAATTGACAGGTTACCAACCAATCAAGAA  
TTGGTGTAAAACAAAAGCAAGAATTTTATGAACCACAATATAGTCTCCAGGCAACCAAC  
ACCGCAGAAATCAACAT

>HORVU7Hr1G042370.8 genomic sequence

CGGTCGCACTATTGAAGGCAAAAAAAGCGTGC GCGGTATAAGTGGTTCAGCGCACGGGG  
CGAAATGGCATCACACGCCGTTTTATTTTCGTCTATCCGCTCCCGCGGCACACTCGAATGC  
CCGCGCCGCATCCTCTCCGACAGCGCCGCTTTCGCTCCGCCCGCGCTACTGTCGGCGAAT  
TCGCCCGATGGACGACCGCGTGGACATCCCCTCACCCCTCCCTACACCCGCGACCTCGCC  
GCTGCCCGCCGCGCAAACCTAGCACGCGAAGCTTTGGCTTCGCCTCCGTCGGTGTCTCCT  
CAACTACCGGTCTTGC GCGTGGTCTTTTTATGGCGCCACAGACGATCTCGGCGGCAGGTG  
GCGTCGTGCCGCGCCCGTTCGTGAAGCCACGCGCCCCCTCTCGAAACTCCCAAATGTG  
GCGATGGAGAAGACGGGCAAGGTGTCCGGGAAGAACAAGGCGGCGGACATCTCCTCT  
TGTTTTGATGTTTGTAAATATCACCGTATTGTCAAAAATGAACATATTGCAAGCGCCGGCT  
ATTCGCGCGCGCTGTAGTTTAGCGCGCCTGCTAGAGCGCTCGCGCACCTATTTTTTACG  
GCGACCCCTGGAGCCAGCACTCTCCGGCGTGCTAAAAATCACTATTTCAACATGCCAAAC  
TGTTTTTAAGGTGTGGGATGATTGCGCGGCTGTTGGAGATGTTCTTAGCCAAGATGCACT  
ATTGCGGTGGGCGAGCACGCTGGGTAGTGGGGATGGGAGAGGGGTCTCGCTGGTACGAGC  
TGTTTTTCTTTTTTGTGGCGAAAAGTGTGATGGACGGTCGTCAAACGCAGCATATCGT  
GTGGTGTGGGAGGCACCGATCGGTCGACCGACGCCTAGTACCTGCCCTCGCCGAAGAGGG  
CGCGCAGGCGTTGACCCTCACAGGCGTCAGCAGAAGGAGAGCGCACGGGCTCAGCCGAAG  
CATCACCGGCAGCCGTCCTGCCGGCCATCTCCACCCCCCTGAATGAAAGACAAAGGAGT  
GTCCTGCTCTTCCAAGGCTCAAATGGCGTGGTGTCACTGTCCTACTCCAAGCCGAGACG  
AAGCCGCAAGCGCCAGTTAAGGCGGAAGAAAAGGAGGCCTCCCGATGCGAATACGCCG  
GCGCAGGGAGGTCCTGCCTGCCAGGATACTTCGCCCCAGGTTCTGCCAATCCCCACTCT  
TCGCCTCCCCTTGATTCTTACTGATTTTTTCTGAGCTCACGATTCGGTTCCAAGATAGCA  
AGATAGTCCGGTCGCGCATGGTGGCCTGTGCATGACTAACCCGGCAGCGCTTACGCATAT  
GTACAGTTGGGGAATTTAGTTGAAAAATTTGAGATATTTGGCTGTTTCGTGCCTAGAACA  
GAACAGGGGAAGGGGGTGGCGAGAATGTCTAGTGGGCTCAAGAACAAGAAGAAGAAGG  
GCCACGAGTGGGATTTGAACGACTGGAGATGGGACGGCAACCTTTCCTGGCCGCACCGT  
CGTCAAACGCGGAAGCGCCGTCGGGGTGC GGCAGCAGGGAGCTCGGGCGGGCTGAGGAAG  
GGGGCAGTTTTTGGTGTGCTGACAAGAGCAGGAGGAGGAGGAGGAGGAGTTTCCACGGTGG  
ATAACCCCGAGGAGCCTCCACATGAAAGGATTGCTGTTTCGGAGAGGACAGATCAGCGAAG  
AAGAGAGACCTGCGAATGCAACAGCAGGTGCATCTTCCAGCTCTGCTCCATCTTGCTTAG  
TCGACGGCTGCCACGCGGATCTCCGCGACGGTAGGGACTACCATAGGAGGCACAAGGTGT  
GTGAGGTGCACACCAAGTCGACTCTTGTTCGTATCAAAAACATAGAGCATCGGTTTTGCC  
AGCAGTGCAGCAGGTCAGTTAGCAATAAATTTCTTCGTATCAAGTTTTTTCATGTTATGGT  
TTGAAGGGAAATCATTGACATTTGTTCTAGGTTTCACCTTGTTCAAGAATTTGATGAAG  
GGAAGAAGAGCTGCCGCTCACGTCTAGAAAAACATAATGGGAGGAGGAGGAAAGCCCAGG  
CCCAGGCTGTGAGTTCCTCGAGTGAAAATCAGTCCTTAACCAATACCTTACTCCTCTTAC  
TGAGACAACTCGCTGGACAAGATTGTAAGTTTCTCGGATTAATTCTATGTGCAGTACAGT  
GGTACACATTGATTGTTACCTGTCCATATGCGATCGATCCATGCTCATATAACCTCAGTG  
TTATGTCGTCGCAGCTGCTGCTAGCTCGTCTGAGCAAATCAATGGTCCGAATTTCTTGGT  
CAATCTTCTGAAGAACCTTGCTGCTGTTGCTGGCACACAGGCATGTCAAGATATGCTAAA



GCAGATCTATTTTCCCCTCTCTTGTGTATATTAATTACTCCCTCCGTCTCATAATATAAG  
AGCGTTTTTGCCACTAGTATAGTGTCAAAAATGTCCTTATATTATGACACGAAGGGAGTA  
ACGCTATGCTCCAACAAGTAATGTTCTGTGGATCACTAGGTGGCAAACCTATTGCAATA  
ATAGTTTTAATCTCATCTGCATGAGGCAAATCTTTAGTAAGATTTTGTTTAGAGAACTTA  
GAGAAATTTCAACTTTATCATCTGCAAGTTAAACATCCACTTTTTTTCTTGGAATCAAC  
TACAGTTCCAGAAGTACTCAAGAAAAGTCCAAGATCATGGGACAAAATTATCTTGTTT  
AGTTCCAAGCACTAAGAAATCACTGGGATACTTAGTCTAACCACAAAGAAGCTTTAACATC  
TCTAATAATTCACATTATTGATATGCTAGACATGTCTACAAGCTTAATAGTCAAATCAAT  
ACGGAATATCCAATTCTGAGCCTGGGCTCATCTGCATCCGGTCAGAAAAAATTCAAACAA  
AATTCAAAAAATTCCAATTTTTTTGTGCAAGGTAGATAATTTGATGCGTGAGGAGCGCTC  
CAAATTTTAAACCATTTGGACATCTAGGTCTCAGCAGAAAAGACAAATTGAAGTCCGAAC  
AGTACATGAACAATACACTTTTTAGAAAGATCTTAAATTTATCTTTTTTTGTCGAGAGCTAC  
TCGGATGTCCAAATAATTTGAAATTTGGAGCGGACATCTCGCACCAAATTTCTACTATG  
ATAAAAAAATGGAATTTTTAAAAAA

>HORVU5Hr1G073440.7 genomic sequence

CAAGACACAAAAGGAAATGCAGTTTGCCCTGATGCGTGCAACCCCTCCCTCGTGCGCTTG  
CACGCGGCGCCCGCCCGGTATAACAAGTGGAGCCGGGCCGGCTGCCACAGCCGTCCA  
TGCTCCACAAATACTATACTGCCTCCTCGAGATGAGCTACTCGTCTAAAAAGTAGACGA  
CGATGATAAGAGGCAAAGAGCAGAGCGTAGTAGCGGCCGCTAGAGGGCGGCGTTTTGGCT  
ATAAAAGGGTGGCAGCATCAGCAGCTGGGGAGAGTGAGGTGCGTGTGCGTGTGCGTGTGT  
GGAGCAGAATAGTGGGAGCGCGTGAGCAAAGCACACTGCACCACACACTAAAAAAGGGG  
TTTATTTTAAGCGCGGCCACCATTGCTGTGCGCTCCTCCCTCCGCGCTTTCCATCTT  
TTCGCTCCCACCCCTTCCCTTCCCTTTGCCTCTCTCTCTCTCTCTCTCTCTCTCTCTC  
TGGTGCTGNNNNNNNNNNNNNNNNNNNNNNNNNNNNNNNNNNNNNNNNNNNNNNNNNNN  
NNNNNNNNNNNNNNNNNNNNNNNNNNNNNNNNNNNNNNNNNNNNNNNNNNNNNTACGGGC  
GTTTTCTTTCACAAAGGAGGAGGGGGACCGGCGGCGGCGGCGGCAATGGAGACCGGG  
AGCAGCGGCGGCGGGAGAGGGCCCGGGACGACGTCCACGGGCTCCACTTCGGCAAGAAG  
ATCTACTTCGAGCAGGACGTGGCCGGCGGGAGCGGCTCCTCCTCCTCCGCTCCGGTGGC  
AGGAGGGGCAGGGGCCCGCTGGGCCAGGAGGAGGGGGAGGTGGTGGTGGCGGTGGCGGT  
GGCGGCGGCGGAGGAGGAGGAGCCTCCACCCCGCGGCCGGCGGCAGCGCCTCGCAGTCG  
CAGCAGCCGAGGTGCCAGGTGGAGGGGTGCGGCGTGGATCTGAGCGGCGGCAAGACCTAC  
TACTGCCGCCACAAGGTGTGCTCCATGCACTCCAAGGCGCCGCTCGTCGTCGTCGCCGGC  
ATCGAGCAGCGCTTCTGCCAGCAGTGCAGCAGGTACTCTCCTATCCTCTCCTTATCACA  
GCGGCAACCAATTTGAGCCGAGCCTCGGATTGCTCCATTTTTTGGTCCTTCCGGACTTGCC  
GCGTGTCTTTCGCGCCACTGTTACACTCGTGACACACACGCTCGATGCCGGCGTAGTGGT  
TGATGGATCCTGCAAATATACTGTATTTTTCTCTCCCACGACTACCTCCCAGCATGTGGC  
TAGCTACTACCACCAGCAGCCAGCATGCAAGTGTA AAAAAGCTGCTCAGGTTCTGCAATT  
GGCCGGCCAGCCTAAGCATTGCTCTACTTCCCTTGCTTTGCCACATCCAGAAAACATAG  
AAATTCTCAAGCGATGACGCATGGCGGTGTGTAGTGCCGTAGTGGGCATTGGTGAAAAGA  
AAACAAACAAATAAAAACAATGTAACATTTGGTTGGGCAGGTAGAATCTGACCAGAATAGT  
AAGGGACAGAAAGGTGTGCAACCTGAAATCTTGTCCGAGTGGCGCATATAGTAAGTCGA  
GATTTCTTTTTTCTCTCTTCTTATTCTACTGTAGGCTATACTAGGATGTGAGAAGAGA  
ATGGGTAGTTCCAGCAGTAGTACAGCCATGGTACCAGTGCTACTGTAGTAACTTAACACC  
CTACCCTGGTGATATTCTTATACTCCTACGTTGGTTGGAAGTGAAATTAGGTAAAGAAAA  
ATGGAATGCCAATGGATTATCAGGTTGAAATCAGGGTGCCTAATCAGAAACCATCAACT  
ATTGTTTAGTTCATCTCCTCTGTGTACGAATACGGTGTTTGTGTTTGGAGATTTATTTGAAT  
GCATGATTCTAAAAACGCGGGAATAGGAAAAACATAGATTGGGAAAAAGCATAGGATTGG  
AATGTCATGCTCATATCAATCCTACAGGATTTGGGCTGTTTGATTGCATCGTAGGAAAA  
ACAAAGGATTTTCTCAAAGATGTTTGGAGTGGATGCTAGAAATCCTATAGAAAGTAGTACA  
AAAATAGTACTCCCTCCGTTCTTAAATATAAGTCTTTTAAAGATATTTCACTATGAGTCTA  
CATAGAGCATAATGAGTGAATCTACACTCTAAAGTATGTCTATATACATCCGTATGTAGT  
CCACTAGTGAAATCTCTTTAAAGACTTATATTTAGGAACGGAGGGAGTAATGGGAAAAAT

TCCTAAGAATTCCAATCCTCCAAAATTCTATGAAAATCCTCTGAATCAAAGGAGCCCTAA  
TGTTTGAAGATAAAGCATCACTTATGACTGTTGTTTCAAAGATGAAAACATCACTTATGA  
CTGCTGTGGTAGCATAAGCCTTTGCACGTTTCCACTATCTAGGAATGATTACAGGTGTTT  
TATCCACATGGTCCTCTTTCCCCCCTGGTCGTGATGCGTGGATCTAATCATGAAAAGTC  
GTTTCTTTGGTTACTGCATTAGTCTAAGAAAAACCCATTGGTTTTGCTTGCGCCGATGCA  
GCTTTTCACATGCCGTGTGATTTGCCCTGATAGTTTATTCATTTGATGCATGCTTGGTAT  
TAGGATACTAAGCTAGAATCTGGCTCTTGATTGCCGGTGTAGCGCTCCCCCTCTTTTCA  
TGTGCACGAAGTTTTTATATGGATTATCAGAATCAATTTGATATGCAATTGGTGTAGCT  
AGTGTGGAAGAGTCAGACACTCCTCACTCTGCTTTTGTGCGTGCAATTGATTATTGTCG  
TCCATCTCTTGTTCACTGTCTAAGTGGATCTATATGAAATTCCTACTTACCGTGACCCTT  
CGGTCTTTGTCAATTCGCATTGGCTCTGCTTTGAATGGATCTGCACTATAGTAAAGCCAC  
CATGTGGAGTTCGTACGTACATGCGGTAGCAATAATCCTTTGTGATCACAGGTTCACCA  
GCTACCTGAATTTGACCAAGGAAAACGAAGCTGCCGCCGACGCCCTCGCGGGTCAACAATGA  
GCGCCGGAGGAAGCCGCCGCCGGACCTATGTCGACACGCTATGGCCGGCTTGTGCGTC  
CTTCAACGGTAAGAATGTTATATCACAGGATCCACACGCTCGCAGTTTGAACGAAACGGT  
ATTGACTCTGCCGTTGTTGGAAATTTTTGTTTCAAGATCCAGGCAGGTTTCAAGAGCTTT  
CTGCTGGATTTCTCGTACCCGAGGGCCCCGGCCGGCGTGAGGGACCCGTGGCCGGCCGT  
CAGCCCCGGCGACCACCGCATGCCTGGCACCACCCACTGGCAGGGCCAGGGCAGCCATCAT  
GAACAACACCACGCTCATCGCAGTGCAGTTGCGGGATACGGCGACCACCACGCGTACAAC  
GGCCAGGGCAGCAGCTCGGGGGGAGGCGGGGGCGCCGATGATCCCGGCGGGCTTCGAGCTC  
CCCTCGGACGAATGTATGGCGGGCGTCCGCCGCGACTCCAGCTGTGCTCTCTCTCTCTG  
TCAACTCAGCCATGGGATAGTAGTGCCACAGCTCCAGCCACATCCGGTCCCCGGCAATG  
TCGACGGCCAGCGCCTTCCAGGGCAGCCCCGGTGGCGCCCTCCGTCATGGCCAGCAACTAC  
ATGGCGGGCGGCGAGCAGCAGCGGCTCCTGGGGTAGCCCCGGGGCGCCAGGAGCATGCAG  
CAGCAGCACCACCACCATCACATGCAGCATGACACGGTGTGAACGAGGTCCATCCGAGC  
TCGGTTCACCACGGGCAGTTCGGCGAGCTCGAGCTGGCGCTGCAGCAGGGGAGGGCCACG  
CCGAACCCGCCGACGCCGAGCACGGGGCCTTCAGCCACTCCAGCAACGCGATGAACTGG  
TCTCTGTAGGGACGGGAGACATGGGACGTTGGGCGGCCTGAGTTTTGTGAGCCGTAGACT  
TTGCCGATCTGGATTTCAAGACGGGGAGGGAACCCGTAGCTGATAGAGCACAGGGGTTTC  
CCGCCGTGTAGCCCAATTTTGTCCATGGACTCAATACCACATATGTATGTACGTGTGTG  
GAACTCCATTGCTTTATTAATTCGTTTGTGAGAGGACTAGTAATCTGATGATCTCGCCG  
TCGTCCTCCTCGTCGCTGTTTCGGTTGCTATTTTAGCCAGCCTCCTCGTCGCTGTTTCCG  
TTGATATTTTCGCCAATTTACATGCGTTATTTCTTTACATAAGCAAAGCGCAGGGGACA  
TACATACATATGCTCACTTCTATGCATGTTTATTTTTATCAGAAGAAGGGCTTTTCTTC  
GGAATTCTACTAGCACGTATGCCTGTGCGTTGCAATAAAATATTTTCTTTTTTACAAGAA  
GCAACATGAGAGACATGATGCGTCCTTCAAAAAAAGTCTCCGCAGCGGTGACCCACAGAT  
CAGGCTCTAAGTGGGACGCTCCGCGGAGACCCGCGTCCGCCTTGCATCTGGTTCGCGTAGA  
TTAAGTGGGATACTTGTCAAAGCCCACATATTATCATGTGGGATATGTGGATTTAGTGGG  
ATACCTACTAAATTTATGTCGATATAACCCTGGTATTGAAATACGTCGGCGTTGTTATCTG  
AGATGCTGAGCTACCATGACCGGTTTCTTGGGAGCTCTAACAGATCATGTGCATGATGCG  
CACGTACAGCCGGCATGCCTTGGCCTAGTGCTCTTGTGCCGTTGTACTGTGCATCACCAA  
TTTTCTTCTCCTATCAATTGCAGATTCCTCCTTTTGGAACTTCTTCTTCTAGATTCTTG  
ATTGATGCCTGGGGTAGGCCTTCTCGCAGTCCTTTCGAGCGGCGCCGGCGGCAGGAAT  
GGTGGAGAAGGAA

>HORVU2Hr1G097610.1 genomic sequence

TTATCGGAGGTCTCATACTCTCGAGCCGGGCGTTCTTCTGAAAGATAAACTTCAACTCC  
TGGAACATCTCAAATGCTCCATGATGCTCAAAGCGACGTTGAAGTCCCGGTTCTAAGCCA  
TACAAGACTGCACATTGAACTACTGAGTAGTCCTCCTTACGTGGTAACCAAGCGTTCTTA  
ACATCCTGATCAGCCGTAGCGGGTGGTTCATCTCCTAGCGCAGCATTAAAGGACATAATCC  
TTCTTCCCAGCTTGTAAGATTAGCTTAAGATTACGAGCCCAGTCTACAAAGTTGCTTCCA  
TCATCTTTCAACTTAGCTTTCTCTAGGAACGTATTAATAATTTAGGGTGACTGTGCGGTGA  
GCCATGATCTACAACACAAATATATTCAAAGTGGACTTAGACTATGTTCAAGATAATTAG





>HORVU2Hr1G097580.1 genomic sequence

TTCCCCAGCCAATAGGGCCTTCGCCACGCCCACTGCTGACACTGCCAACCCGGACCACCC  
GACGTACCGGCCCCATCCTGCTCTGCCCTCCCACTGCATGCATGTACACCCCGCTCTGC  
TGCGCAGGCCGCCCCTTTCCCCCTCACTGCTCCGTTACATCGCCGCACTCCGTCCATCC  
CCCATGACGTGTGGGCCATGATCTACCTGGTCCCACCTTTCGGCGAGAGTGCACGGCATA  
GTACTGGTACGCGGTGCGGAAACATCCGTGGTGGCGTCCACTTCCGGATATGGCATCTTT  
GTGCAAGTGGGAGGGGGCGCCACCCTCGTTTCGCTTCCCGCACCAGGCTGGAGCGCCGGT  
CGCCGACGGGTGGGCCGGTGGCGTGGGTGAGGATAAGGTGGTCCCACGCGCCAGCGATTA  
AAGGCCGGCCCGGGCGGGCTGCTAGGAAGGAGCAGTGCCTGTTGTCGCGCCGCGCGCGGC  
TTTCGATGCGGCGGTGGTGGCAGTCATGTCCGTCCGTCCCCATGGGGGTGCGCAACGCGG  
CCGGGTCCC GCCCGGATTGAACCCCTCAATGGCGCCCATCCATGTGGCGACGGGCCCTG  
CGCTGTCACGAGCCTGCGTCGTACCGCCTCCCCTACTTGCAGCAGCCAGCGGCAAGAGGC  
TACAGTGGTGTGCGAGTACACTCCTGCTGCCAGCGGCCAGCTGCGCCTGCGTGTGTGTGA  
GGACAGATCCCACCTGTCAGTACGGCGCTGCCGTGCCTTCCACACCAGTCACCAGTGCGC  
TGCTCCTCCCCGGGAGCTCGCCTCCCTCGCGCGCGCGAGCGAGCCACCTTTCC  
TACTACTACTAGTAGCTTTTATATCGGCGCCAGTGGGATAGCCTACCTCTGCCTGTACTT  
ACAGCAGGAGCAGCCGTCGCCGCAATTTCCACTTGCTCGTTTAGTCGCCACAGCCACAGC  
CACAGCCACAGCCACAGCGGTTTTAGCCTAGCCACCGCCGGGGGAACAGCACATGGAAGG  
AGACGGCGACGCTAGGTCGAGGGCGGGGCTGGCCTGGGATCTCGGGATGCAGCAGTGGGC  
GCCCGCCGCCTCGGCTACTTACCCGCAGCATTTCCTGCCGCCGCCGCCGGGGGTGGC  
TAGCCACCACCAGCAGCAGCAGCATATGCAGCAGGAGCTCACTAGCCTAAAGCTGGG  
TAAGCGCCCCTGCTCGCTGGCCGGCGTCCAGGTGGCTCAGGTGGACGGCACCGGGGCTGC  
CGTGGTGGAAAGGCAAGAGGAAGGAGAAGGCGGGCGCGCCGGCAACGGCGGCCATGCCAAG  
GTGCCAGGTGGAAGGGTGCCACATGGTGTGCGGGGGGCAAGGAGTACCACGGCGGCA  
CAAGGTGTGCGAGGCGCACTCCAAGGCGCCAGGGTTCATCGTGCACGGCGCCGAGCAGCG  
CTTCTGCCAGCAGTGCAGCCGGTACGTAAATTCTTTATGAAACACGCCCAAACCTTCACCC  
TGTGCTAGCTAGATCCATCCATTATGTACACGTACACGTACGTGCGTACCTGCAGAGTCT  
CTCTCCTACGCTAGTTAGCGTTGACTCTATTGTCTGCGTTTACATGCGTGCAGCTTCCAC  
GCGATGGCGGAGTTCGACGACGCCAAGCGGAGCTGCCGCCGGCGCCTTGCCGGCCACAAC  
GAGCGGCGCCGGAAGAGCAACGCCAACGACGCCATGGCCAGGGGCACTGCGCACGCACAC  
GGTAATCCATGTCATTACTCGCACACGTCCATCAGCGCGAAATACTCCTGTTGACATGGA  
TGTGACAGCGTACAAGTTAGAGAGAAGAAACATTGTAAAGAGCAACTCCAACGCGCGCGG  
ATCCATAGGAACGACGTTTTTTCGGTTTTCTGTCCGTTTTAATTCGATCGCGCGTTTTAAGA  
TTTATAAATCGGCACTACGTCTAACGTCCATAATCCATTTTATGACAGCATATTAGTTAG  
AGCAACTTTAACGTGCCGACACAAACAAATGACATTATCGTTTCGTTTTTTGTCCGTTTAA  
GTCGGTCGCCCGTTTCGGGGTCCGTCTTGTTTAAACATTTGGATCGGCAGTGCGCCAACGCT  
CATGACCTATTTTCATGTCTGCGTACATATTTGAAAAGACTCGCGGCCGTAGATCAAGACA  
GTTGCCATGAAGTCGTCCAAAGTTCATGTCGGTACCATGATCGAGCGGGAAGCGGTCCAG  
GTCCAGGCCAACCTGATCTTGCACCAAGGCGGCATGCATGCCAACTTGATCATAGGTCGA  
CAGCGTGAACGGTCTCGGTGTCCTCGTTTTGGGTCTCTTCGGGGTTCGTAGCCAGCCGT  
GGCGGCACCGTCAGCGGCCACTGTATCACCTCGAAGATGATGCTTTGCATGAAACAGTT  
GCCCCCTCTCGTCGTCGACGGCCACCGACATTCTGCCGAACAGATTACGGACGTCGGGGAG  
CATGTGCGGTGACATCTCCCGCGTGTGTTTTACGGCCACCCGAGATGAGCCACCGGCT  
ACTGGCGTGACGTTGAGGTGCGATGGGCGCGGACACGGGTATGGAAGGTGCCACCGTGCTC  
ACCTTCGGTGAGCATTCCCCGAAGAGTCGGGAGGCTTCCGGGTAGTCATGGAAGCCGAGA  
ATCGGGCGAGTCGCCGACGCGTCGGGCGACTCTGGTAGCACCATCCAAGGAAACACACGG  
TGTTGGCCGCGGCCACGACAGCGCTGACGAGCCCGTGCTGGCCAGGGTTTAAACCCTAGGT  
ACAATAGCACCTCCCTTGTTGCCGCCGCGACGTGGGGGACAGTGTCTCCTGCTGCGCGA  
CTGCGGGTATGGCTGCGGCGGCCGTTGCTTCATCCCTTGCATCCGCTGCGTGCCTCCGGC  
ACTTTATCTTCGCCGACCCAGTAGCCCGCTCCTCGGCGTCAGCTTCTTCTTCTTCTGGG  
CGCGGTGGCGGTCTTGCGGGGGGGCGTCGGGCTTGCCCTTGCCGGAGGGGACGGTCATGAT  
GCCGAACAAGGCAAGGGACGCGAGGCCGACTGTGGCATCGAGGTCTTCGTCCATGGCGAG



CTTATTATCCCTGTTTTTGAAGCTTGATTAGTTCAAGTTGACCCAGAAAGCTAGCTAGC  
TAGAAACACCCTCAGTCGTTGTTAGGGCTTAGCGAGTATTATACGATGTAAACTAAGTAA  
AGAACAACAATTCCCTCAAAAAAATGTAAAGAACAACAACATAGTGTAATTCTCAATTGTC  
TGAAATTTTCGTAAATATATTTATATGTGTCTCTTGAAATGGCATCACTAAAAGCTAACC  
TAATAAAATAATATAGTACTACTACTAGTCTCTCCATTCCTAAATATAAGTCTTTTTAGA  
AGATTTTCATGAGAAAACACTACATTCAGAGCAAATAAATAAATCTACACTCTAAATATGTC  
TACATACATCTGTATATAGTCCCTTAATGAAGAGAATGGCGTTTTGGCTCCCGGGAGCCA  
TGGAGGCCGAAATGTTTGAAGAATTTAAAATTCGAAAATTTTAGTTCCAAAAAATCTGAA  
AAAAATATACAATAAAACAAGGATGTGATTTCGTGTGTGTGTGTAAAATTTTCAGGTCGAAA  
TACTTTGAAACGCGATCTGTATAAAAAAGACAAATTCATGGTCTGAAATGATGAATAGTA  
ACATGTGTTAAAAGGTTTCAGATTTATCTTTTTTGCACAGCCCTTATTTCAACGTATTTT  
GTTCTGAAAATTTAAACACTTGTGTATTATACCTTCATCTATCTATTTATTTATTTTCAG  
AATTTTTTGAATATTTAAATAACGAATTTTCATTGAATTTGAAGTTTGAATTTAAAGGCC  
TCCAGTGAGCTCGGGAGCCAAAAGCAATATTCGCTTAATGAAACATTTAAAAGACTTATA  
TTTAGGAACGGAGGGAGTAGTATCTAACTCAGTAACTGAAGCAACATCTAACTGTAGTTT  
TGAGATTCTTGAGATATGAAGTGACGTGTGTACAGTAGTCGTTGTACGTTGTCCTAAC  
GGTTACAAGTGTGACTGAACTTCTAGCACTAGATGAAATCATGTCTTGTTTATACAAAAC  
CCCCAAAAGATTACGGGAAAACAGTGCCTACGCTCTAGTCCAGGCCGGTAATTTCTATG  
CGCGCGCCAGCAAGCACGTTACAACGTTTCGACTAGATAGAACTGGTCGTACACGACATG  
ACACACCTAGATGCTACTTCTAGTAGGTTTTGGTTCGGCCGATCTGACGTACGTACCTACT  
ATTATATTGCTCAGCTCAATTAACATGATGTATACGTATGGCGCCAAAACATCTAACAT  
ACGTAGGTGTAGTACTATCGTACTATACACTTGATGGCTGCTACATACATGTGGCCGTCA  
AATCTTGCAGTCTTGTCTGACGTCGCTAGGTGTATATGCTCAGCGAACAAGTCGACGACG  
GCGGCGGCCTTCTCGCCGAGCGCCAGCAGCTTCAGCTGCTTTCAGCAGCAGCAGCATGCG  
CTCGACAACGGCGGCCAGTCGAACAACGCCACGCCAACGTCGGCGCCTCCGACGCTGTCC  
CTGGCGGCGCCACCATCGCCGCCTCAGCAGAACGACGGCGACTTCGGCTCCGGCCTTGAC  
ACCATGCTGCAGATGCAGCCGCAAGAGGCCGATGAGCAGGGGGAACAGCAGCAGCATCTC  
ATGATGACCTCGCTCGTGCAGTCGCAGCGGCAGCAGCAGCACCGCGACAGCGGGAACATC  
TTATCTTGCTCAACGACGTCGGCGTCGGATCAGCGTCACCACCACAACAACGGCGGCAGC  
TGCTGCAACGACAACAGCATGCAGCATTCTTCGAGGTGGACTTCATGTAGTGCGACCCG  
TGCATGCATTGCATGAATGAACCTAGCATAGCTGTGCCTAGAAGTGGTTTCACTGCATTA  
TCGCGAGGGGTGTGTGCATGAAGCCATGAACTGAAGAAAGAACAAGCTGCTTGCATGCAC  
TAGGCTGTGCACTGCATAGAGTATAGGTGTGTGTAGGCGTGCAGCCTTTTTCTTTTCAGA  
TTTAATTTCTGACTTTTTCTGCTTACTGTGTCAATTTGCTTGTGGTACATTCCTCAGTGG  
TACCTTCTTACAGGGGGAATAGTGTATGTACTCCGGTATGCTTTTATATTTGGTATAATG  
TAATTATCTTAGTATTCATGCTAACACTATGATCCGTTTGGTTGGAGACTAATTTTGCCA  
AGCCAAAGTGTGGCAAGCCATCAAAGTGTGGTTGAAAAACGAATGTCAAACCTTTGGTAA  
AAGTTGGCAAATTTTTAACTCTATGACAAATGGGCCATAGGGACAATAAAGTGTGGCAA  
GCCAAAGTATGGCAAAAACCAAACATTTGCCAACTAACTGTAGCTGCCAAATTTTGGCT  
TGGCAAAGTGTGGCTGGAAACCAAACAGGCCCTATATATATGTTAGCCTCCTGTTCTTCC  
ATAAGCCATGTTTTGTAGTAGTATTTTATTTAAGAGAGGACTCTATTGTTTACCCGGTAG  
TTGTATGTTTTGTGACATATAATACTCCATATATAATGGAACCTTCTGTTGAAATATCCGA  
TTTTAGAGACTTTTAACTGTTTTATTTCCAGTTTTGCATTTTGGTTGTTTATGTTAGAT  
AGAGTAGGCATGTTGCGTCAATGATTCATAAAAAAATATGTAAAGAACGAAGGACATCA  
TTGACAATCATGTCAAGTCTTTCAGTCTTCTCTTGTTCGATCTGTTCCATTCCTCAT

>HORVU6Hr1G019700.3 genomic sequence

TGTATCCGGAAGAGGACACTGTGGGATTATGTATGACGTAAGTAGGTGTTTCAGGATCATT  
CATTTGATCATTATTAGTTCACGTTTCGTTTATGTGTAGCTCATCTCCCTCTTATTCTTGT  
ACTCGTAAGTTAGCCACCTCATATAAATGCCTAGTCGCTTGTGCAGCCTCACCCTTAA  
CCATACCTCACCCGTTAAGCTTTGCTAGTCTTGATACCTTTGGAAATGAGATTGATGAGT  
CCCTGTGGCTCACGGATTACTACAACAACAGTTGCAGGTATAGGTAAAGCGATACTTTGA  
CGTGAGCACGATGATTGTTCTATTTGGAGTTTCTTTTTCTTCTTCTTCATCGATCTAGGA

TGGGTTCCAGGCCGGCAGGCTGGGATAACAAGGATGGACGTCGTTCTTTTATCGTTTGTT  
TTTGTCCGTAATCGGACCCTGCTCTTCTATATGATAACTGTATATTGTTGTATTAATGTG  
ATGTTGATGTAGCTTGTGGCGAGTGTAAGCCAACCTTATGCTCATCTTTTTAGTGCAT  
GTACTTGTAAACGATATCCATTCTTGCGAAATGACGAGATGCGTTTCTATCCCTATTGAGG  
CCTCGCGCCAAAATAAAGATAGGATCGCATCTTAGACGTTACAAGTTGGTATCAGAGCAG  
TACCGACCAGGAGCCCCTTGATTGATCGAACTTGGCCGAGTCGAGTCTAGTGAAAACTG  
CTTTGAGTCTAGTTATATATCGGAGAGTAGGATTCTTTTTTATCCTCTTCTATGCTCTGG  
TGAGGAATCTTGTCGTAATAATTTAATTCTACTCCTCTTCTCACTCAAAAATATTTTAG  
GATCACGCGGATATTTTTGGAATCTCTATGATGTGCGATGTGAGGGAGTTTTGGTGGTGCC  
TCCTGTCTGACTTGATTTCTTCCGGGGAGTTGAGCTCCAGGGGATTCTTGAGTACATCGT  
TATCATTAGATTTAAAGGTTAGCCTAATACACAATTTTAGGTAATAACAATTACAAA  
ACAAAGGAAATTGCAAGTACTCGGTACCCCAACTCACATTAGTCTTAACAAAACACAAGA  
ATTAAGTTTAATTTTTTAGTTACACAGTAAACAATTGTATTTAAGAATAAACAATTTAAG  
TTAACAATTTCTATTAATCAATAGAATTTCAAGTTAACCTAAGCCCGACCCTATGCCTAAT  
GCACAATTTAAGTTAATAACAACGCTGGTTCCTCAAGCCTAATTGGAAGAACAAGCATAA  
TCCCAATTTAAAAGCAGAGGAGGAAGGAAGATTAGGAACACTTAGAGTAAGCCGTAGCC  
GTCGATTCCATTCGTCCAATCTTGATGCAGCTAGGGTTCGCCACCCAAATCTATGCCAT  
CCGCAACCGCTGCTCTACCGACAACGTTGACTCCGAAAAATTATCGTCGATGTTTCGTGTA  
CGCTGAGCTGGAGTCATCATTGCCATGGCCGTCGATTTCCCCTGACGCACCACACCCTGA  
GCATGGGAGGTCTCCGCCGCCATCGTCCCCCTCACCGACGCTCGGGTGAGCTAGGGTTCG  
AGGGGAGAGGTGCGAGGTGGGCTGGACGAACCGGTTTGATCGAACCTGGCTAAGAGCGAC  
CAAACCGGACTCGCCCTCGTCAGTGTGCGAGCACGTGCCGATTGGCCAACGTGGCACCTG  
CCGGGCGGGCCTAACCGGTTAAAACAGTGTGAATACGTATAAACATTCAGTTAAGCCT  
TTTTGCAGCGGCTAGCCCGAGAGTTGGTACCGACACGTGAAAATTACCACTCTTGATACC  
AATCTAAACGTAATAACCCCAATTATGATACCTTCATGCAATTATCTCTCGTAACTTCTAT  
AGCAGCTGGAAAAGGGCAGCAATAAATCTTGTAGCGCGCTATTTTTATTGGTTCAGATG  
TGTTGTGCTTTGTCATTCTCTGAGGAGGCGATGATGCATCTGCTGCTGCTGAGGACCTCG  
TAGTTCGGTGCTGCTTTTCCACGGAAGATTTTGTGTACAGTAGTAGATGCATATAAGTA  
TCACTACTAGTAGTAGAAGTAGTAACAGTAAACATGTGGTGAGATGAGTGCGTTAAGCCT  
AGCTGTCTCTCTTGACAACCTGAGCCCTCTTGGGGATGGTGTGAGGGAGGGCATGTGCCTG  
GTCGTTGCTGTGTGTGTGAGGATGCAGTACAGTAGCAGCAGAGGCATCCAAATCCATCCC  
CACTTGACACTTTCTGTTTATTCCAGGCCTACTCAGGTCAGGTGGGGGCATCATCTCGTT  
CATCAGGGCATGGCATGAGAAAAAGTTAGCTCATTGTGTGTGTGTGGATTATTGTGGGT  
CTTGTCTTTCTTATCTGGTGGTAGTAGTAGCCCTCCTTTGATTGATTTTGTGAGGCCCTC  
ATCCTCCCAAGTGCCTGCCAGGCAGAGGGAGGGATACTAGAGACTACACCAAGGAGAC  
AAAGATTCTCCAGCAAAAAGGAGGAGGCGGCAGTAAGATTCTTCATCGATCTCCCTTTCC  
ATTGCATTGCATTGCATACAGTAGGCTGTACACCATGGGGCGGCATGAGCAGTTCTTTCC  
CTTCCCTCTAGACGGGTAGATAGAAAGTGTGTGTGCCCCCTGCCCCACAGAAAAAGAAAG  
CAGCTGACTTGATGTGGTATAGGTTCTCCCCCTCCCTGCCCTCCGCCGTCCCAAAGGGG  
TTTGATTTGATCTGCATCTCTGTGTGTGTGGAGGGTGGCGCAGAGGCAGCGTGGTGCCTG  
GAGGAAATAATGCAGCCCTGAGGTGAGGTGAGGTGAGAGGTGGTACCACTGGCTCTTAGG  
GTGGTGGTGAAAGATCTTGATTGGGGCGAGTGAAGCCGGGGTGGTTGTCATGATGCGCCG  
TAGGGTCCAGCGCCGGGGTGGTTGCTGATGCCGTGATTGGGTTTGGTTTTCTTTTCTTT  
CAAGCTGATATTAGATCCCATCTAGAGGTGAGATTTGAGGGGGGAGGCAAACCTTGCGCC  
GAGAGGGCCTGAGGCAGAGCTTCTTCTCTCCGGTTGATGGGTGCGGCACCACGGCTCGCC  
CGGGTCCAGGGGGAGCTCCGTGGTTGTTCTCCGGCGTGCTGCTGATCGGGGAGGGAGCTG  
CTCCGGGCTTCCCGGAGGAGGAGGAGCAGGAATTCTGCTGGCTTGCCCTGTTATTCTGGGG  
GAGATAACAACCTTGATCTTTGGTCCCTCCAGGTAATTGCGTGTTCTCCTTTTTTGTCT  
CTCTTGCTGCTGGGAAATGGAATCATGAATTGATCATCTTCTTCTTGCCATAACTGACGA  
TTCCACTTGTGAAGAAAGGTACTACTCTGCATGCTCTCTGCTGCGCAGTGGTACACGGCA  
TTCATTCATTCGTTTGATGATAAGTAGATACTACCAGCAGTGCATCATCTTTGTGTA  
CCTCTCTCCTGCCCTCGGTGCTGCTCATGTGTGTTCTAAGCTGTTTCATCATCACTGATTT

TTCCAAGTGCAAAAAAATTACTCCTGATTTTTCAATCTATCTAATTTTGCTAACACCTC  
TTTTCTTCCATTTTGTGGCTTCAGTGTGAGCAGCTTTGACACACAAGTAGGAGGAGGAGC  
GGCGCCGGAGATCTTGGGCTCTGGCATGGGCTCGTTTGGGATGGAGTGGAAACCAGAGGAG  
CTCCGTGCTGTGGGACTGGGAGAATTTCCC GCCGATAGGCGGCGACAACCCCAAGAATGC  
GATGCAGGCCGAGCCAAGATTCGCTGCCGTTGCGGCTGCCATGGGGAATGAACCGCTCAA  
TTCTTCTGGCGGCAGCGGCACCTTCTCTTCCAGCTCGGAGATGGGGTATGGCTCCTCCAA  
GAGCTCCATATCCGCGTCGATCGATTCTTCGTCCAAGGCTGGGAGCAACATGGAGTTCAG  
ATTTGCGCCCGTCAAAAACCTGACAGGAACACGAGCGAAAACACTGAGTTGGGTAAAGT  
TGACAACACGAGGACTGGAACGTCTCCGTCTGTGGTGGCAGTGAGCAGTGGAGAGCC  
GGTGATCGGCCTGAAGCTCGGCAAGAGAACCTACTTTGAGGATGTCTGTGGAGGGCAGAG  
TGTCAAGAGCTCGCCATCGGGTGTGCGAGTGTGCCGAACAAATCTCCTGCTTTGAGCAA  
GAAGGCAAAGGCGGAACAACAGAAGGCACATAACTCATACTGTCAGGTTGAAGGCTGCAA  
GGTTGATCTCTCTTCTGTTAAAGAGTACCATCGAAAGCATAGAGTATGTGAACCTTCACTC  
TAAGGCTCCCAAAGTTGTTGTGCTGGTCTGGAGCGGCGCTTTTGCCAACAGTGCAGCCG  
GTGAGATGCTTTAGATTGCAAATAGTGGCATCCTGTAGGACAGAAAAAAAACCGTTGTTG  
TGATCTGTTTCTTTCCCTTCTTTGATTTTCCGCTTCTTTCTAGGTTTCATGCTTTGTCTG  
AGTTTGACCAGAAAAAGCGAAGCTGCCGTAGGCGTCTCAATGATCATAATTCCCGCAGGC  
GGAAGCCACAGCCAGAAGCAATTCCTTCAGTTCGTCAAGGATGTCTACGATGTTTTATG  
GTAGGGTACTAAGCTTGTATCTGCCTTATGTTTTGTGAAATTCATGCATTAAGTAAGATG  
CTTACATATGTCCTTTTAAAACATCCACGTATGCTCACACCAACTCATGGGCACAAAAAA  
CTACTAGGGCAGAGCATTTTTTTTGTGTGGGAAATGGTCAATTTCTTTGTTGGTTCAAATT  
TCCTCACTAATCATAATGTAAAAAATTAGTCACGATTTTCGTAAAGTGTGATATCGGAAAG  
GCTCTTTGTGATCCTGGTGAATCCCATTTGTGAGGGTTTCTGTTGATAGGAACAATTTAT  
GATGATTCCTGTTGATGGGAATTAATGGATAACAATTATAGTTGTCCTTATTCTAAGGAG  
TTGTGCCCAATGTACTATTCATTTTACTTTATACTATTACTCAAACATTTTTGTACTTT  
TGTCTGTTAATAATTATGTTATCGTGTCAATGGTATAGTGATTCAGAAAAGAAAAAACA  
ATGCATAATTGTACAAACAAATTGAGGATTTGGAGTTATGGAAGCAGTTACATTTCTGAC  
TTATGGACATTTTGTGCTAAAACCTCTCGTAATGACTTGAACAGATGCAAGGCAACAGCCA  
AATTTCTATTCGGTCAGGCTCCATATGTTCAAATGAGAAGCTGTGGAAGTTCTTCATGG  
GATGAACCAGGAGGCTTCAAAGTTACACACACAAAAGCTCCTTGGTTAAAGCCAACA  
ACTGCTGCAGGTGTTGATGGGATGCATTTATCTAGTCAGCAGATGTCGGACAATGTTATGCCG  
CATGGTGCACATCATGGTTTCGATGGGTTTCAAGGGAACTTCTACAAAGTTC  
CCTAATCAAGGTATTTCCCACTTATGAATGAATTTCTGATTAGACGGAGAACAGTGGCC  
ATATAAAGGGTCATCACTTAAATGTAACTTTTCTTCTAAAATTCCTAACTAAAACAAG  
CATAGATAAATGCACCCTTCGTGTTTTTTTACGCACCCTTCATAGAATCATACTTT  
TGGATGTTTCTTCTACGAGTAATTTCAACTGTTTGTGAGTTGTTCTTTGAGTTAACAT  
AACTGACACGAAGCTTTCTGCACTTTCTGAACATATAGCTGTATCATTTCAACATTTT  
TAGGTAAGTTTAGTTTGAACATGCGACTATACACATGGTCCCTATTTTTGTGATCCGGG  
GACCTGATTGCTATGTCACCTACCCTTATTTAGCAACCTTTGGTTAATCACACCCTTT  
ACTGAATTTGCTTCTTCGTAAATGATTGTA  
CTTCTGTCCTACAGTTATTCACAATCTTT  
GACTGATCCACCTTAGAAGAGCTGTCAGGCTCTCAACATCTTCTTAGTACTGATTTGATT  
CTGACATTTACCAGAACTGTGATTAGTACCATTTGAGACTATAGCTTTGGGTCCGGAAG  
AGACCAGGAAGAGACCAGGCGGTGGATTACTTTATTTGTCATAATCTGGCATGATTGAGT  
TGCTCAGCACAAATACTTAGTTAATAGTTTTTTTTTTCATGTGGAAAGTCGTTGATAATGA  
TGCACATGCAGGCAAGCTTTGGGGTCAAGATAAATAAATAAACAAGTAGTCTGTTATAGA  
ATCATGAAAATTTTGGTCCATCTATGCTAGGATTATCCTTACTACTCCCTCCGTTCCAA  
AATAATTAAAGTCATAGGATTTTCTAAGTCAAACCTTTTAAAGTTTGACCAAGTCTATA  
GAAAAAATCACAATATATATAATGTGAAATATAATTCATAATGAATCTAATTAAGTAAT  
TTTAGTTTTGTAAATGTTGATTTTGTTTTTATATAA  
ACTTGGTCAA  
ACTCAATGAAGTTT  
GACTTGGGACAATCCTAGA  
ACTTCAATTTTGCACGGTGGTAGTATTA  
ACTACTCCCT  
CCGTCTCAA  
ATAAGTGTCTTA  
ACTTTGTACTAGCTCTAGTACTTGTATTAAGCTTAAGA  
CACTTATTTTGGGACGGAGGGAATATTAAGTAATGAGA  
ACTTCAGAAAGGATTGCTAGTC

AAAATAAATAAATTCAGAACGGATTGAGATTTTACATTGCGCATTAAACCCTGGATATGT  
GGCGATTATATTCTTAAGTATGTTTAGGCACTCCAAAGAATCTTTTCCTTGGTGATGGAC  
ATTAACACTAAAAGTTCTGCTTGTTACCGTTTCCAGGTGTCCAAGCTTCCGCTGTCCG  
CCCAACTCCAGTGGCGCCCCGGATCTTCAGCATGCTCTCTCTCTTCTGTCAAGCAACCCA  
GTGGGTGCTGCCAACCTCCAGCCAACTTCCCAGATGCACTCTGGGGTGGCTGCCATTGCC  
GGCACCCCAACCCCGCGATGCACGTGCTGGGATCATCGGCAGGGCTCTGGCTAGACGGC  
GGGCCACCCCTAGATGATCACCCGCGGTTCCAGGTCTTCGAGCGCTTGGGGGACCACGAC  
AGCGAGCTCCAGCTCCCAAAGCCTTCTACGACCACGCTTCGCACTTCGACCGGATGCAC  
TGATGACGACGGCGCTCCGATCCGGTCACCCCGCTCGGTGCGTGATTTTATCACGCGATC  
GACGCCGTTTGTTCGGTCTGAAACCCGGGATCCTGCATTTTCTTTGCTTGGTGCCGTTGC  
CTGCCTAGAGGCTTATGGTTTGGCAATGCCTAGAATAAAGGCGCACACGAACAGACTTAG  
GATCAAATTGACCCGGTTGTGTTGCCATGGAAGAAGATCTTGATCCATCATTTAGCCACT  
TGTCTGAATAATTCTGAACTTGCTATGTTTCTGAATTGCTTCTGCAACTGTAAGTGATCA  
CAGTTTTAAATTCTTGATGATGGCGTAGCGGTGACCCATGGCACGGTGCCAGCCATTGCA  
AGAGGACCGGCGATGGCTGGGACAGAGATCCAGTGACCACGGCGTAACATGGCCAGGCAC  
TGCACATCGTCCCCGTAGCGCCGGGCACTGTTTCATGCACTGTCATGTGGGTACCGTTCCT  
GTCGATCCGTCCGCTGATCTTAAATTGGACGAGGGGGGCCATGTCAGCATTGCTGTCCCT  
AAAGCCTAAGGCATTTGGTCTAAAAACATGAGCACATGATGACATTTTTCGNNNNNNNNN  
NNNNNNNNNNNNNNNNNNNNNNNNNNNNNNNNNNNNNNNNNNNNNNNNNNNNNNNNNNNN  
NNNNNNNNNNNNNNNNNNNNNNNNNNNNNNNNNNNNNNNNNNNNNNNNNNNNNNNNNNNN  
NNNNNNNNNNNNNNNNNNNNNNNNNNNNNNNGGGGGGGGGGGGGGAACATCCTCCTAAGAGG  
CCAGTACAGTGGTGTACAATGAAAAATGGGGGAGAACATCCTCCTAAGAGGCCAGTACA  
GTGGTGTACAAGTGAATCAATGGACGTCCAGGAGGATGGCAGGGTGACTCTAAGCCCT  
TTGGCTCCTGCCTTAGCCCAATTCGTGGACTCGTCCTTGATCGCAGCGTCTAGCTCGACT  
AAGGATGGGGTTACATGGTTGAATACACACACGTTTCTATGCTTTCAGATCATCCAAGGA  
ACCAGGAGCGCTACGGAGGCCAACGCTTTGCGGAGCAGGGGGCGTAGCATCGCGAGCCCG  
CAGCCACCAGTCGTGGAGCGTGGCATCCTGGTCAGGCACCGGAGTCGGGAGATGCAGCCA  
GGACATGATTCCGTGCCAGGTCTGCTTCGCGAATGGGCATGCGAGCAGCG

>HORVU2Hr1G048280.2 genomic sequence

ACAAAATATGATACATACTACCAAAAAAATAGTATATATACTACCTAGTACACATACATA  
CTCTTCGATTTGATAGATAGTACATACAACATACAAAACGCAAGTGATGGTAACTACCAC  
CGGTGGTAGATATGAAAAAATACATCCTACCATCCAGGGATANATATATAGGTATAGATA  
TAGATATAGATAAATATTTGACACACTTATATATCTTTATTTATATGATAATATATGTCT  
CATTTATAGTATAAAGATTAATTATAAATCATGTAAAGACTGACATGATAAAACTAAAA  
ATATATCAACATATTATTAAGCTTGACACCAACGTCCTTGCCTCCAACACAGCCGCTGCA  
GCAACAACAAAATATTAATCACTTTATCACCCGAGCATAATGCGGCTCCGTCACTTAG  
CTTGACACGCTTGTATACCTGGGTTTAAACACATAAGGCATTATGTTTAGGTAACGCTTT  
CACCCGGTGCGCCGGCCCTTATGTTTACCCATGCTTACGTACATCGTATTCTGACGTATC  
CAAACCGTATTCTGTACAACACTAGCGCTCCACATCAACATGTGCACCCTGCCTCCACAC  
ATACGGCACCCGCCTTTATATCCCTTTCGACCTTTCCTTCCACCCCTCCGCTTC  
TTCTCCTTCTCCTTCCACTCATCAGCTAGCTCCACAGTTCCACTTCTGCGACAGCTCCCC  
GAGAAGAGCCCTAGCTAGCTTCGTCTTCATCGCGCCTCACCGGAAGGCATGGACCGCAAG  
GACAAGTCTCGCAAGTCCCCCTCAGCAGCGTCCATGGCAGCGCTCGCCGCGGCAGCTGNN  
NNNNNNNNNNNNNNNNNNNNNNNNNNNNNNNNNNNNNNNNNNNNNNNNNNNNNNNNNNNN  
NNNNNNNNNNNNNNNNNNNNNNNGAGAGGTGCGGCGCCGACCTCACCGAGGCGAAGCGGTA  
CCACCGCAGGCACAAGGTGTGCGAGGCGCACTCAAAGGCTGCTGTCGTGGTTCGTCGCCGG  
TCTGCGCCAGCGCTTTTGTGAGCAATGCAGCCGGTAAGGACAAATTCTTCAGAATCACGT  
CCGCTTAGGATTTTCTTTGTGATCGGTTTCGTTCTTTCTAAAAGTACTCCGTAATCCATGT  
ATGAACAACCGGATAGATTATCCATTTGGCTCTTATCTTTCTTGAAACCTTCATTAAGT  
CTTGAAGTGTAATACTAAGACAATTTCAATTTCAATTTTATTTAGAACATGCGTGAGGCTA  
TACCTCTTGGCTTCATTCTTGATAACCTTCCAATCAGCACCGATAGTCTGTGATAAGAAA  
AGAAACGTATTAGTGCAGGTTACTGTTGATTTACGCCGTACACGTAGATAGTAACCCTGT









TGAGTTAGTAGGTTAGTCCAAATATGTGTAAAATGATATAAAAAGTGTAGCAAACACATA  
ACATTGTCACCCAANNNNNNNNNNNNNNNNNNNNNNNNNNNNNNNNNNNNNNNNNNNNNN  
NNNNNNNNNNNNNNNNNNNNNNNNNNNNNNNNNNNNNNNNNNNNNNNNNNNNNNNTAGGGC  
GAATTCTCTGGACACAGAGAGACGTGCGTGCGTGCGCGTGTATTTGGCATGGATTCTTGG  
GAGCCCAAGATGCCTTCTTGGGACCTCGGCACGGTGGTCGCGCCCAGCGGGCGGGGGGA  
GGAGGAGGCGGGCGGGGGCGCTGGACCTGAAGCTCGGCGCGCCGACGAGCTGGAGGCCG  
GTCCCGGCGCCGGTTGTATCGGTGCAGCAGCAGCAGCAGCAGCAGCAGCCGCCTTCCGCGGCG  
ACGGCGAAGCGTGCCCGGGCGGGGCAGGGGCAGCAGACGGTGCCGGCGTGTCCGTGGAG  
GGGTGCACGGCCGACCTGTCCCGGTGCCGCGAGTACCACCGCCGGCACAAGGTCTGCGAG  
GCGCACTCCAAGACGCCCGTCGTCGCCGTCGCCGGCCAGCAGCAGCGCTTCTGCCAGCAG  
TGCAGCAGGTACACCCTACACTTCTCTCTCTTTTTTCCATTTTTTTTTTGGTCGTGCATT  
CCCTACCACCAACTTGTTCCCTTGCCTTATGACATGCATCCATGCTCCGCTTTTGCCACTA  
CTAGTAACATCTTTACCGTGTAGTAGAGTAGTAAGTAGCAAGATCCTTCCACGAGTTACC  
ACTGTTGCACGAGAGTTGCAGCGAATCGTTTCAACCCCGCCGAAAACCTCGCCGCGGACA  
CTGTAGCAGCTGCTGCAGCAGCGGGCGGGTAGTACGCGATGGCTAACCAACTACGGCGA  
CCGTTTTAATCGCAGCAATTCGCTGTCAGCCGGAGCGGAGCAGTTCGCAGTCCCTTGGGC  
CATCATCATGGCTCGCTTGGCGCTAGCGACTAATCGTCCGACGTGGACCACACAAAAAC  
CCCTGTTCCCTGCCGCCCCCATCTGTTCCCCACTCACCGTAAATTCCACAGCGAAAAAATC  
ACTCAAACACTATCTCAAAGTTTATTTTTCCATGCAAACATTTGCACTGGTACTCCTAC  
TCCTACCTGAAAATGAAAGCAGTATCAGAGGAGAAGCAAGAGAATTTAACCGACGTGGTC  
GTGGAGACGGATAAAATTCCGGGCGGGTCGGAGTCTGGTCCCGGGCCCGGGCCCGGGCTG  
GTGGCCGGATGTGTGTATGAACGAGACAAGCGCACACGCGCCACCATTAAGGTGCCGTGG  
CGCAGCCCGACCCGGCCCGTGCACCTGCCCTACAACGACGCTCACGCCGGAACCTGGACCT  
TTCAGGTCGTCGTTCTCATGGCGTGGCTGCTGCTGCTCAACGGCCGCGTCCCTGTCC  
TCCACCGCTCCCTGTCGCCGCCGCCCTTGTCGCGACGCACGCTTTCCACGTCCGTCCCTC  
GGTGGTTTTCGAAACTGGGAATTCATCCCATATGCCTGTTCTAGAAGGCAGGGATCATGGA  
TCTCAACGGTCAACCGTGATTGTGGACGTCTGATTAAGATTCTTGCGTGAAGGTTACGGG  
TGTGGTTAAGCTCGTCTGGAGAGGGGCTTGGGAGATTGGGGCGTGTATCTTCATTTCCAT  
GTGCTTGATTTCTCCTAGATCTGTGGCATGTGGTTGGAGGAGCATCTGACCGGATCTACT  
ATATGACAGGAGCACTCTTTTTTTTTGTGTTAGCATCTGATCAGGATTTGTATAGTAGTT  
TTCACGCTGAATTTGTAGTAGTCTATCTTGAGAAATGCTTGTGCTGATCAAACCTGTTG  
TTTGCAGGTTCCATTTGCTCGGGGAGTTTCGACGAGGTGAAGAGGAGCTGCAGGAAGCGGC  
TCGACGGCCACAACCGGGCGCCGCCGAAGCCGCAGCCGGATCCCCTCAACCTGCCGGCC  
TGTTTCGCTAATCACCACGGTACAATCCCTAAAAACATCTCTTGCACCCCGTGGAATTGG  
TCATCCTACCTAGAAAGCACTCTCATTTTGATTTTGTAAAGATCCAACCATTCGATGAGCA  
AAGTAATCGAGATTTTTCACACTCCCATTTTGTTCGAAACAAGTGGAAAAATGTGATGCA  
TTTGTATGGATCATGTGATCTTAGCTAGTTTTCTTCTCAGCTTTATCCCCTTTCTGTTTAT  
TTAGACTGTTTCCGATTTTCAGCTGACTGCTAGTATTATCCAGAAAAAACACTTCACACG  
TGCTTGCTGAGTATAGAGTAGCACAAATTTTTCTTCCCTCCGCAAAGGATGGGAACGGG  
AGGTTTGACTACAGAGGTGCTTAAACTAGCAGTGGTATGAACGTCTTGTGGTGTAGCAG  
ACCAAGATAGGTTTTAGCCTTTGGCTGGCATTTCAGGAACTTCACGTGGGATCCAAAG  
CAAGAGAATATCTAGGCCTGAAGTTTCTTCTGAACTTTCTGTCATGATACAGCCGTATTC  
ATGTGAAAGCCAGTTAATGATGTCACAGTGAATTGAATACCTATGACATGAAACTACTAC  
TAGTAGCACTCCTATACCTTTGAAGATTTTACATGGAATTTACCATGTTACAATGCAA  
AGTAGCAGGGTGAATGCACTGGGAATTTACCGCTTGCTTTGTAATTTTAGTCTTTTGT  
TTTTTCAATCAGTTGGTGCACATGGCTGTTGTCATGCAGGTTTGCAAACTGACGTCCGA  
GCTAACTGTTTTCTCCCATCATTTTCCGTGAACAGGAGTGCCAAGATTTGCGTTCGTACCC  
GCAGATCTTCTCCCGACGTCCATGGCGGAGCCCAAGTGGCCAGGCGGCATCGCCGTGAA  
GACGGAGGCCGACGCGTTCCACGAGCAGTACTACTCCTTCAACGGCGCCGCCTCCCTCTT  
CCACCACGGCAAGCCGGAGAGGAAGCACTTTCCCTTCTGACCGACGGCGGCACGCCAC  
GTTCCGGCTGCCAGCCGCCGGCGTTCACCATCACCCCTTCTCGGAGAGCAGCAGCAACAG  
CAGCCGGCACAGCAACGGCAAGACCACCATGTTCCGCCACGACGGGGGCCCGGACCACAA

CTGTGCTCTCTCTTTCTGTGTCAGACAACCCGGCGCCGGGCGCACATCATGAACCCCGCGGA  
GGCGCATCATCTCGGTGGCGGCGGCGGCGTGACCATACAGTACGGCGGTGGAGGCGGCGG  
CAAGGTGGCGCGGCTGCACAACAACGGCGACGTCTCGCTCACCGGGCTGTCTTACGTGAG  
CCTGGGTGACAAGGGCGCGCCCATGTTGTTGCACACGTCTAACAGATCACAACACGCCGC  
TGCTACCGCTACCACTGCCGTTACTACAAGCACAGCTCCAGCTCCGACGGCGTCGCAGAT  
GCAGCAGTACCATGGCTACTACCACCACCAACACCAAGTGGGCGCTGATCAGGGGAACCA  
CCAGGATGCTGGTGGGATGCATGCCCTTCCCTTCTCGTCATGGTAGTTGTCTCCCTCATC  
AGTCAGATCCTAGGCAGTTGGTGGTGGTCATCAATCATCGAATATGCCCCCTGATAGTGT  
TAGCCCTGATGATCCTCAAGAAATCACCCGAGATATGTCCATTTTGCAACTTCTCATGAT  
ACTTCTAACTTATGGAAAATCCCTCCTGCTTATGATTCAGAATTGGATTACGACGATTCT  
ATTTGTACCGGTTGGTTTTTTGTTTCATTTTGCCCGGCGTGCACCTGGTTTGCTAGGGCAG  
CATCAGCAGAAAGTAGACAGAAGGATTTATTTAACTGTACTAAACAGTGGAATTAGCATA  
AAAGTATTCAGATAATTGATCATTCTAATCACGCGTCTGCCTGTTCCCTCACATGTTGTGA  
ATCATTAGAGATATTGTTTCAGCAACAGTAATTAGATTATCCAGGATTAGGGGCCACTTCC  
ATAGCCTGGTTCTAGATAGGCCCATATGCTTTTCAAGATTTCAGATAGCTACACCATGTTGT  
GGAAGTGTGCTTGTGTTGCAAGTACTCTTTGTCAAAAATTAACAGTAAAGTACATGTTGA  
AGATGTGGCAACTGGGAGTCCACATAATTCGTTTGAAGTCCATGTTTCATGGGAGAGTGAT  
TGTTTGAGGATCTAGGGGGTATCATGTTGACAAGTAACCAAACAGGCCAACTCTACTACA  
GGGCACTCCCTCCGTTCCCTAAATATATATAGATTCATTAATGTGCTTCATATATACTTCC  
TCCGTAAACTAATATCAAAGCTTTTAGAACACTATTTTAGTAATCTAAACACTCTTATAT  
TAGTTTACAGAGGGAGTAGTTGTCAGTGAATCTCTACAAAGACTTTTTTCGGAGCGGAG  
GGAGTACATAAAACTGAAATTTTACCAATGACGCGTGGCGATAATAGTTATCAGTTAAAA  
AATTGTGGCTGAACAGATCATATTTG

>HORVU7Hr1G110980.3 genomic sequence

TTTCCCGATTCGTGTGCGAGGCTGAAGGCATGTACGAGCCGAGGAGCGACACCGACGGGC  
GTTGGCCATGGCAATTCCGAGCCCTGAGCGAGCGGAAGTTGGCGGGAGGGAGTACAAAAC  
TTGTTTGTGCTGGTTCGGGAGTGTAGGGGTTGCCGGAGTTGCTGCAGTTTGGAGGAATTA  
GAGGGATGGTTGCGACGGTGAACAACACGGCGATGGGTGGAGGTGGGTGGGGTGGGGGTG  
TTGGGNNNNNNNNNNNNNNNNNNNNNNNNNNNNNNNNNNNNNNNNNNNNNNNNNNNNNN  
NNNNNNNNNNNNNNNNNNNNNNNNNNNNNNNNNNNNNNNNNNNNNNNGATCTAGAGGTAAA  
CCGTGGAGGTATGTGGTCGGGCTGCCGTGGCAAAGTTGTCTCAAATCAGCCCTAATACC  
TCAGTATATATAGGAGGGAGGGGGAGGGAAGAGGCAGCCTCAAACCCTCAAGGTTTGGCC  
GAAATTGGAGGTGGAGGAGTCCACTCCAATCCTACTTGGAGTAGGATTCCACCTTCCCA  
CTTGAAACTCTTCCACCTTGTGTTTTTTCCTTCTCAAACCTTATGGGCCTTAGTGGA  
ACTTATTCAGCCCACTAGGGGCTGGTTTATATCTTCCCATAGCCCATGAGACCCCTTGG  
GGCGTGACACCCCTCCCGATGGTCCCCGGCACCCCTCCCGGCACTCCCGGTACTACTACCG  
ATGAGCCCGAAACCTTCCCGTAATGCACGAAAACCTTCCGGTAACCAAATGAGGTCATC  
CTATATATCAATCTTCGTTTCCGGACCATCCGGAAACCCTCGTGACGTCGGTGATCTCA  
TCCGGGACTCCGAACAACATTCGGTAACCAACCATATAACTCAAATACGCATAAAGCAAC  
GTCGAACCTTAAGTGTGCAGACCCTGCGGGTTCGAGATCTATGTAGACATGACCCGAGAG  
ACTCCTCGGTCAATATCCAATAGCGGGACCTGGATGCCCATATTGGATCCTACATATTCT  
ACGAAGATCTTATCGTTTGAACCTCAGTGCCAAGGATTCATATAATCCCGTATGTCATTC  
CCTTTGTCCTTCGGTATGTTACTTGCCCGAGATTCGATCGTCAGTATNNNNNNNNNNNN  
NNNNNNNNNNNNNNNNNNNNNNNNNNNNNNNNNNNNNNNNNNNNNNNNNNNNNNNNNN  
NNNNNNNNNNNNNNNNNNNNNNNNNNNNNNNNNNNNNNNNNNNNNNNNNNNNNNNNNN  
NNNNNNNNNNNNNNNNNNNNNNNNNNNNNNNNNNNNNNNNNNNNNNNNNNNNNNNNNN  
CGGTGGGAGCGACAGGGGCGGCGACGGGGGCGG  
CGACACGACGGTGGTGGCGGCGGCGAGGTGGTTCGTCGGGGATTGGGAGAGAGAGACAGAGG  
GGCGGGGTGCCGTTACACAATGTGGGTGTGAGAGAGAGAGGGGCGGGGTGGGGGGAAAGAGC  
CGTTAACATAGTTAGCTCTTTGCCGTTTGCCGGCGGACGGCAAAGAGTCTANNNNNNNNN  
NNNNNNNNNNNNNNNNNNNNNNNNNNNNNNNNNNNNNNNNNNNNNNNNNNNNNNNNNN  
NNNNNNNNNNNNNNNNNNNNNNNNNNNNNNNNNNNNNNNNNNNNNNNNNNNNNNNNNN  
AAGAGTCTAGA  
CTCTTTGCCGCTGCCTCCGACTCTTTGTCGTCCGCTAGCAGACGGCAAAGAAGGGACT  
CCAGTTTGACCTAACCACCCCGCGGTCAGGTGGACCCATCTACATCTTTGTGTCGTCGCTG

TGAGACTCTTTGTCGTCTGCTAGCTGACGGCAAAGATGTGACTGAAGGCCAAAACACTCT  
ATGCCATCAGCCAGTGCTTTGCCGTCTGATTTGTTGAAGCTGACGGCAAATACACTCTTT  
GCCAGCAGCTAGCACACGGCAAAGATTAGGCAGATGGCAA AAAACTGTTTTCCAGTAGTG  
ACGGTCCCAACAGAACACACAAACAATTTTTTGATAATATGTGTACACGTCATCGAGACGC  
CAAGGTCCTTGCGGTTAGGTATGACCAAATGCCGGTGTCTTGACGTCTTGTCCATGACC  
AGGCGCTAGGGTCCCTGACGTCTCGGTCTTTGCCACGTCTGCGAGTTAATGGGTACGCCA  
ATCGTGCAGGAACGTATCAGACGTCAGGCACCTTGACGTCTCGCATGTAAAACCAGACGA  
GATGGATGTTGAAGTCTAAAAAAAAGTCAGATTCGTTTTTTTTGGAAATATCAATCTTG  
AAATTGTTAGCACAAAAGGTCAAAAAAAAATATATCGTCCTCCTTCTCCCCGCTCCAG  
TACTACTCTCACTCTCTCTCCTTGGCCGGCCGGCTCCCTTTTTAACCACCTCTGCGC  
CCTCCACCACCTTACACAGCACAGCACAAACCACACTCATTCACCACCCAGCGAGCTCATC  
ACAACCACACGCGCCTTCTCCAGTCCCAGCTCACTCGGGCCGGCCATGATGAGCGGGCGG  
CAGGATGAACGGCCCCGGCGAGCGACGACTTCCCGTTCGGGGCAATGCAGCCGCCGCCCTA  
CGTCGGCTTCGAGCACGCCGGCGGAGGAGGTGGCCAGCGCCATCAGGGGCGCGATGATGTA  
CGACA ACTTCGACTTCGCGGTGCGGGCGGCCCTTCGGCCAGTTCAGGACGCGCCGCA  
CCACCAGATGCTGGCGATGCCGCCGAACGGGAGCGGAGCAGGCGGGCTGGTCCCCATGGC  
GCCGCCGCCATGCCATGCCCGGGATGCAGCTGCAGATGCCGCCATGCCCCACGGTAT  
GCACGGCCACGGCGACGTGTGCCCGTCGATGGGGATGGTGAAGCGCGAGGGCGGGCGCCG  
GGACGCGGGGAGGATCGGTCTGAACCTCGGCCGGCGGACCTACTTCTCCCCGGAGACAT  
GATGGCCGTGGACCGGGTGTGATGCGGTCCCGTCTCGGGCGCGTGTTCGGGCTGGGATT  
CGGCCGCGCCACCAGCAGGCGCCCCGGTGCCAGGTGGAGGACTGCAAGGCGGACCTCTC  
CGGCGCCAAGCACTACCACCGGCGCCACAAGGTCTGCGAGTACCACGCCAAGGCCGCCCT  
CGTCTCCACCGCCGCAAGCAGCAGCGCTTCTGCCAGCAATGCAGCAGGTCAGTCAACC  
CACATCCC ACTCCACAGTATCCCTTCCTCTCCAGAAACGAAACGAGAGTACTGCGGAGCG  
GACTTGGTCAGTATACTCCACCACGTATAGCCGAGCTAGGCTGCAAATTGTGCAGGCTAG  
GCCAGTGAAA ACTGCTTGCCTTTTCAGTCTTCACTCGGTTTTTTGGCTCATGTGCTTGTG  
CGTTGCGGCGGCCATGGCAAGAAAGAGGGTCTGTGCCAAAGCAAGTCTCAGTCTGAGAGA  
CGACCGGTCATGTCAAATACAGTAACAAAACACA ACTCAAACCCTAGTCCATGTAGCGC  
AAACATGAGTTTTCCGGTCTGGGGATCGACGTAGACAGGATCACGAAAAGAAAAGGAGA  
TTCAAAGGGCAGCGTTTTCTTTGGGCTGGCTGCTGCAGACTCCAGACTGCTGCGTGCTGCA  
ACGAGCGGCTGATCCTGTGGCAGGCTTTTGCCATGCCAATGCCACATCTCTGCTTTTCTC  
TCATTGACCAATGTCGTCTGGTGTGTCAGTGGCGACTAGGCTTTTGCATCACTGGATT  
ACATGCATGCATGACTTGTGAGCTAGCTACAGAACTTTATGTTTTTTATGTCTTGTGAT  
GTACGTGAAATGCGAATTTTATGTTTAGCTTAGCGTAAGTTGATATTGTGCTTTGGATCG  
GCTTTAGGTTCCACGTGCTCATGGAGTTCGACGAGGCGAAGCGGAGCTGCCGGAGGCGGC  
TCGCAGAGCACAAACGTCGCCGGAGGAAGCCGGCGGCCGAGCAGCGGCGACGTCGTCGA  
AAGACTCGGCGCCGCTTCCAAGAAACCAACGCCGGCGCCATCTGCAGCTCCTACACCG  
GCGACAACAGCAGTAAGCCTACACGTTTCGCTTATCTAGCTGCATCCTACCTGGTGCAT  
TGCTCATCATTTACCGGTGCTAATTTGCACGCACGTACGATCTATGGATCAGCTTTGAGC  
GCGACGAAATCGACCATCTCCTCCAACACGAGCGCGATCAGCTGCCTCCAGCTGCAGGGC  
CAGGCCAGGGCGGCAGCTGCGGCGAGGCCGACGGCGCTCACCTCGGTGCGCCGCCGGAG  
AAGGACGACCAGCAGCAGCAGTTCAGGAACGCCATGCAGCTCCACCACCATCAGGAGCAC  
CAGCACTTCATCACCTCCCTCCTGCACGGCAACATCAATAACAGCAACATCCTGTGCTGT  
TCCTCGGTGAGCTCAAACACGATGCCATCGGCCGGTGGCGGCCAACGGCGAGGACGACAAC  
AACACATGCATATGTTTGGAGGTGGACTTCATGTAGACGTTGGATCTTGAGCAGTAAGCT  
TAACATAATTATCTTACCACATTAGATGGTAAGCCGAAGTGTTTTGTTCCTACTGCTTAT  
ATGGCGAGGTCCAGTGCTACGGTGTATTGGGGCTTTAGCAACAAAGTTGGTAGGTAATCT  
TGTCAGAGTCTTATAGTAATTATGATAGGTTGATAGAAGTACACGACTTGGA AATTGTAT  
AAGCACAATCCTAGCACTGGTATTTGGAGTAGTAGTATAGCCCTGGTCTCCTAGATGGAG  
GCGAGTAGTGTAAGCTTAGGATGGGTGTGTCCAGCTTGGTTACAGGATCAAGCTTTTGT  
ACGTGGGATTTTGGAGAGAAATAAAGAGAACAGGCAGAGGCACATGACATCACGTGCCTT  
GGCAAAGATCTTGTACACGTTTGTTCATCTAATTGGATGTGATCAATCTTGAGCGTAAA

TTCCAATGCAGAGTGGTGTACTAAGACTACACAAAGTAACATAGGTAGTAACATATATAC  
CACTTAAATAAAAAATATGATGTGATAACTAATTAATGAAAAAAGAGAGAAATTGGGTAA  
CTTAGTTATTAGTTACTCATATGAGTAACATAACGCATACCAAGGCAAATTAGTCTATA  
AGCTAATAAATAAAAAGGTTCAACGTTAGTACTCTCTCCGTCTGGGTTTATAATTCGTTTT  
AGGTTGTGCACCGCAACCAAGACGGAAAGGAAAATGAGAGAAATTAATGTTAATTTAGTA  
ATTAATACTATTGCATGCAATGAATCCACCACTCCATATCGTGCTAGTTAGTCTCTAGTT  
ATTAATAAATATACACACCCACGTCATTTATTGATTGATTTCTTTATACATATCAAAA  
ACAAAAAAGAGGGTGAAAGTTTGTGCACCACGCTAAGTGTTTTGGGACTATTTTCGTTTT  
CGTAATATGACTTTTAAACCGAGACCGAGGGAGTACTTCTATGTTACTATTCATTATGAA  
GGTAATAACTTTGACTTATAACATATGCATTTACTACTCTACTCCCCATTGTGAGTAGTC  
TAGTTC

>HORVU5Hr1G117190.5 genomic sequence

TCATGCACCGCATACCTTGACATGGTTATGCCCAAGTGTCACGATACACCTGGATGGTTC  
TTAATGCATGGCCTCACTTACCATTTAACGTCGCGCCCCTTCTCCATACACACATATTT  
TATATGTTATTTTCCCTAATTTTACCATCGTATGTCACGCAATTCATGCCGCGTGTA  
AACCCAGACTCAAAGTTTGACCTCCTGAGCCCCCCTTGAATGGGTACATACGTTTCAA  
GATGATATCCGCAACATTTGGCGTCGCCTGCTAGATATCAACCAGCCGATCATATACGAC  
ATAACGACCGCTCGCCGCACCGCGTCAGCCGCGTCGAAAGTTCCCACCCCTTTACGTTA  
CCCCTTCCCGGTTGAGCGTCGCCGCATCGGTCCAACGGCTGCGAGTTTGACCATCCAGAA  
GATCCACCTTCCATGGACTGCACACCTCGCCATCATGAACATTACCTAGTATAGTATAGT  
ACCATCATAAAACACCAATAATAACTTTGTGATGATAATATAAAAATAAGGTTTGATAAT  
AAACAATGAATATCTGCCCCCTGCCGGCGTGTAGCCGCGCCCGCGTGCCTGACAAATT  
TGGCAGGCCACTTTCTTCTACTAACACACACACACACACACACACTCAACTCAGCC  
GTCCCCGCTACGCGTCCCCATCGGCCTCCACCATCTCACGCGCCCCTCGCTCTTTCCCT  
CCCTCCTTCCCTCCTCCCCAGTCCTCCGCGACTCCGCTGCTCCCCAGTCCACCGTTCCC  
ACCACAATCCCGCTCCCGAATTCGCCCTGCTCCCGGCGGAACCCGCGTCCCGACCCTCC  
CGGAGCCCGATTGCCCCCCTCACCCGCGTCCGCGCCGTCGATTCGTCCGCCCCGTGCG  
CCCCGCTGATCCACGGTATGGGCTCGGATTCGCGGGCGGTTTTCCGAGTGAGTGATCCCC  
CCGCCCCGCGGGCATGTGGGTGTCGCTGGTCTGGATCCGCGGGTTCGTGGGCGTCACC  
TTCGTGACTGCCTGGGCGGTACGGGCGCCGACTAGATCTCTCGGCCCCCGGCGGGCGGC  
GCGCGCTGCGGCGGTTTCAGGAGGGCTGCTTGTTCGTGGGTGCTTTGCTCTAGGGTTTC  
GTGGGGATGGACTTGGAGGCGGCCAGGGTAGGGTCGCAGAGCCGCCACCTGTACGGAGGC  
GGGCTGGGTGGCGAGCTTGAAGAGGCCAGGGCGGAGGAGCGGGTGTTCGGCTGGGACCTC  
AACGACTGGAGCTGGGACAGCGAGCGCTTTGTCCGACGCCGGTGCCTCGCGGCAGCGGGG  
AATGGACTGTCGCTCAACAGTTCGCCGCTTCTCCTCCGAGGAAGCCGGGCTGAGGTGGCT  
AGGAATGGTAACGTTAGAGTTGACTCTGATAAGAGGAAGCGAGTGGTTGTCATTCATGAT  
GATGACAATGAGAAGGATGATGACCCAGTGGGGAACAGTAGCAATGTGCTCAGCTTGAGA  
CTTGGCGGGCGCAACTCTGTTGCCGGCGGAGCGGCGGAGGATGGCGGCGTGAACGAGGAG  
GACAGAAATGGTAAGAGGATCAGGGTGCAGGGGCGGAAGCTCAAACGGTCCGGCGTGTGAG  
GTGGAGGGCTGCTGCGCTGACCTTAGCGCGGCAAAGGATTACCATCGGCGGCACAAGGTC  
TGCGAGATGCATGCTAAGGCCAACACTGCGGTGGTTCGGAAATACCGTCCAGCGGTTCTGC  
CAGCAATGCAGCAGGTCCGTTTTCCGATTGAGCTGCTATTACCTTTTATTTACATGTGT  
CTGCCAGCAATGTAGCAGGTCCGTTTTAGACTGAGCTGCTATTACCTTTTATTTACATGT  
GATACATTTCCCTCGTGTGGGAATGTATTGGTTGAACATGTTATGCACGTTTTTATTTTGT  
TTCTATTTCCGGTCTGTTCCGAATGCAACGTGAGGCTGCACTACCAAACTTTTGGCGTTG  
ACCATAGGTATTGGCGTCCGTGGATTGTAGCCAGGGTTTCCCTGTCCACGGCAAATATTTT  
TGTCGTTCAATTAACTTTAAACGCCCGCACTCTAGCGAGACGGATGCGGCGAAACAGAATC  
CTTCGCCAATAATTTCCGCGAGCCTGATTTTGGCGGTGCATGACCTGGGCGTGAAGCAAAC  
AGACCCTTTGAGACCAGAGCAAACCCCATAGCAAACCTTCTGTCCATGATGATCTTTTAAG  
CAATACCATTTGATATGTGAGAATCACCAAACCTATATGTCAACTATATGAAAGCAAAGTA  
AGCTCTCATTTCAGATTGAAACGACATGTGGAGATTTTTTTTAGCAAATATCTAGCAGA  
AAGAAAACAGGAACATCCAACCTCCATAGAAGGAAGAGTTATGGTGTGTCGCTGGGAGC

AAATGATCACATAGTACCACTGGGAATATGTTCTGAACTTCTGATTACACCTATTAGTTA  
TTCATCTATATCAGGATTCGTGAATTTGGTTTATCGAACTTACGTGAGTTATAAGTCATA  
ACCAATTCCAAATACAAATGCCTGTTGTACTCTTAGTTTTCCCTTTTCAGTTGATATA  
ATCGGTACAATTCATTATTTGCATATGTGTGAGGATTAGTTGACGTTGATAAACTTGGA  
AATCTCCGTCCTATTCAGATATTTAAGAAAAAAGAAATTTTCGAAATTTGTATGTTGTT  
CTCAGTAACTTAACCTTGTATTAGAGCGCAAAGATATGTTTCACACAGTCCAAATTTCCA  
ACTAGACTAAGTTCCATCAAGTTTTTCATGCGATGTAATTGTCACATTGGCTCCTGCATG  
TATGCATATTTGGGCATGACATGGCGAAAATAATGGCCTTCCGTGGTTCATTTTTTCCT  
GTTCTTGTACAAGTTATATCTCTAAAGATGGTGCCACTTTTAGGAAATATTGAAGCCTG  
GGCATGACCGGAGGACTACTTTTGAAAGCATTGATTTACCTAATGTATTTTTTCTGGTA  
TGATCATAGTGCATGCATTATGTGTACCTTCTAAAATATTGACAAATCCTCTTGACTACC  
GTACATTATGTGCAGATTTACCTTCTTCAAGAATTTGATGAAGGAAAGCGAAGTTGTGCG  
CCGGCGTTTAGCAGGCCATAATAAACGTAGGAGGAAAACCCGCCCTGAAAGTGCTGTTGG  
TGGGGCTCCTATTGAGGAAAAAGTTAGCAGTTATTTATTGTTGAGTCTTCTTGGAAATATG  
CGCCAATTTAACTGTAAGTACTGCTATGAAGGTTCCAAACTTGCTAGAGTACCATATAC  
AGCTAATATTCTGTGAATAAGGGTACTAGTATTTGTATAGTTAGTTTTCCACTTAACCAT  
CTGAAATTATGTTGACTCCGAGCTTTGACTGAATTTTATTTGGCCTTGACCTAAAAGAAG  
ACTATTGTTGATATTGTTTATGATGTCCATTATATCTTTCTTAAATTCGCAGTTGCATAA  
TCCTGTGATTTTTAGCGGTGTGAGCTTAGCATCTTTATACTACTTTACTGCCTAATATTT  
GTTGTCTATGATGGTTTCTCCCAAATATAGGATAAGAGCATTGTTCTATGCCTAAATTGA  
ACTATTATCAGCGTACTTAATGACTTTTAGAACTACTCTTATGGTAATAGTACTCAGGAA  
GAGACATGATTCTTAACATTGTACTTGCAGCTGACAATGCTGAGCGTGTACAAGGTCAGG  
AGTTGCTATCCAATCTTTGGAGAACTTGGGGACTGTTGCAAATCATTGGATCCAAAAG  
AACTCTGTAAACTCCTGGAGGCGTGTGAGAACATGCAAATGGATCAAATGCTGGGACCT  
CGGAAGCAGCTAATGCTTTGGTGAATACTGCTGCAGCAGAGGCTGCAGGACCATCTAACT  
CTAAGGCGCCTTTTGCGAATGGTGGTCAATGTGGGCAGTCGTCATCTGCTGTTGTACCAG  
TACAATCAAATGTTCCCATGGTGGCAACTACCGGTAAGACATATAACCTTTTTAACTCCC  
AAGAAATTATTGCTTATGAAAAAATAGCTGATATCGGTATTGCGTGTTTACAGAGATTCC  
AGCATGCAAGTTAAAGAATTTTGATTTGAATGACACTTGCAACGATATGGAAGGCTTTGA  
GGATGGTTCGAATTGCCCATCATGGATACGTCAAGATTCTACTCAAAGCCCACCACAGAC  
TAGTGGTAATTCGGATTCAACATCAGCTCAGTCACTGTCAAGCTCAAATGGAGATGCTCA  
GGTTTATTATTTTCATCCTTTCAATGTGCTCAGAAAAAATAAATCTAAATAGCTATTTTC  
AACATCTTCGTACCTTTCTCTGACATACATTGGTACTGTTTTGCTTCAAGTGTCGGACTG  
ATAAAATTGTATTCAAGCTTTTTGAGAAAGTTCCTAGTGAATTACCTCCAATTTTGCAT  
CACAGGTAAATATGCTCACTCTCGCAAATTAGAAGAGAGCATATCTTGATTTTAACTT  
TAACCCTGAATTCAGATCCTTGGTTGGTTGTCCAGTAGCCCTACTGATATAGAGAGCTA  
TATCAGACCTGGCTGTATTATCTTGACAGTTTATCTTCGTTTAGTTGAGTCTTCATGGAG  
AGAAGTACATTTCTTTCATAAACATTTTCATGTCATGGTAGTGTCTTTTTTCTGGCTGGT  
GCTTCACATTTCTTTTGTACAGCTCTCTGAGAATATGAGTGTATATCTGGATAAGCTCTC  
AAGTAGTTCTGCTGATAACTTTTGGACATCTGGTTTGGTATTTGTGATGGTACAACATCA  
AATTGCTTTTATGCACAATGGTGAAGTCCAAGCTCTTATATATTCTTACATGGCTTGTGAG  
GTTTCATTAAGCTGTACGTCAATATTTTGAATATCACCTTATGGTCATTTTACTGCAGG  
TCAAGTTATGTTGGACAAACCACTGGCACCTAATCTCACCACTTACTGCAAGGTTTTATG  
TGTTAGTCCGTTGCTGCTCCTTTTTTTCAGCAACAGTTAATTTTCAGGGTAGAAGGCTTCAA  
CCTAGTCAGTTCTTCTCGAGGACTTTATCATATACAATTTGCATAATGCTCATTCTTG  
CAGAGGACAAGTACAGCTTGTGTTCACTTCAGCCAATACGCTGTTATCTAAAATACAC  
ATGTCATGTTACAGGCTAATTTGCTCAATTGAAGGGCGTTCTATATTCGAAGAAGACAC  
AGCTATCATGGCTGATGATACCGAGGATGAAGATATTGAATATCTCAACTTCTGTTGTTCT  
TCTCCCTGATACAAGAGGAAGAGGATTCATAGAGGTACAAGTTATAACGTGTTAACTTCT  
GTTCCGGTGTAGTTTTTGTTTTAAATAAATACTTCTAAATCATTCTAATTAATGGTATCAT  
TGGTGATTTTCAAGTTGAAGATAGTGGATTTAGTAATGGTTTCTTCCCCTTCATAGTTGCT  
GAGCAGAATGTGTGCTCTGAGGTTTGTGAGCTGGAGGGCATATTTAAGTCATCCAGTCAT

GAGCAGGCAGACAATGACAATGTCATGAATCAAGCTTTAGAGTTTCTACATGAGCTGGGG  
TGGCTTCTTCATAGAGTTAACATAATTTCTAAGCATGATAAAGCGGAGCTGCCTGTAGCG  
GCCTTTAACCTGTTGAGATTCAGGAATCTTGGTATATTTGCGATGGAGCGGGAGTGGTGT  
GCTGTGACCAAAATGCTGTTAGATTTGTTATTTGATGGATTTGTTGATGCTGGGTTGCAG  
TCTCCCAAAGAGGTGGTATTGTCAGAAAATTTGTTACACTCTGCTGTGCGAGGAAACTCT  
GCCCCAATGGTTAAATTTCTGCTGACATAACAAGCCGAACAGAGGCCTGAATGAAACTGCA  
GAGACATACTATTACAGACCTGATGCTCGGGGCCCTTCTGCATTTACACCCCTACATATA  
GCAGCCGCTACTAGTGATGCAGAGGATGTATTGGATGCATTGACTGATGACCCTGGACTG  
GTACACCCTCATCTACTCATGGAATATGATCTCATGTACTTGCTTGTGTTCTATGTTGTC  
TAGCTTTCTTGATCTTTTAAGTTTCATTGCTTGGATGTTTAAGCTTATTATTTAAGGCTT  
TTCTTTTTGTTATCTTTTAGCTTCTGCACATGTTTGACATCAGTTTAATGATGAACAACA  
CATTAATGATGCTATACTACTTATCCTCTTAGCTTAGTTTGTTTCCACTTCCCTCCGTTCC  
ATATTAGTTGTCGCTCAAACGGGTGTATCTAGCAGTGAAATACGTCTAAATACATCCGTT  
TGAGTGACAGTTATTTCCATACGGAGGGAGTATTAATTAATTCTGAAGATCCTGTCTAAT  
GCCCCTGCTGTTGCTTCTTGCAGGTGGGACTGAACGCATGGAGAAATGCGCGAGACGAGA  
CAGGCTTTACCCCTGAAGACTATGCTCGCCAAAGAGGCAACGATGCTTACATCAATCTGG  
TCCAGATGAAGATTGACAGGCATCTTGGCAAAGGTCATGTTGTCCTTGGTGTCCAGCA  
GCATGTGCCCTGCAATTACCGATGGGGTGAAGGCAGGTGATATCAGCCTGGAGATCTGCA  
AAGCCATGCCAGTGACAACAACATCCGCCGCAAGGTGCAACATTTGCAGTCGTCAGGCTA  
AGATGTACCCAAGTTCCCTTTGCGAGGACCTTCCCTGTACAGGCCGGCAATGTTACCGTGA  
TGGGCGTCGCCGTGATCTGTGTTTGCCTCGGGATCCTCCTCCATACCCTCCCCAAGGTTT  
ATGCCGCACCAAATTTAGATGGGAGCTGTTAGAGCGCGGAGCCATGTGAGGGGTGCGTG  
TCGAAATAAGGTTAGGGGTGTTGCTGTTAAGAGTTTTAGTGTGGTTGTTAGATCAAACAA  
ACATGTAATTGTGTGAAGAAGTTCCGTTGTATTTAAAATTGCAGAATCTTTGCCCTGAT  
ATAAATTTTATATACCGTCAATAATAAATTGATTGTACATGTGCCGTTTATTTCTATTT  
GGTTGCAATTTTAGGCTGTGAAAACCATTTTTGAGAGTTGTGTGTTTAGAAGAGAATCAG  
ATTAACATGTTCTTTAATCCTTCTTTGTAATCTGTATATATGCGAATATCCATGTCTG  
AGCCGGGCTCATATACACCTGGTGAACAGTAAATTTTTAAAAGAAAAGAAAAGGAAACA  
AAAACAATTCAAAAAAAATCCTTTTGTGTTTGCATGGAAGATGCTTTTGGAGTCCGTTTAA  
AATTTAGCTTATTTGAACATTTAAGTAGCTCTAAAAAAATTGAATAAAAAAAGTATATA  
ACAATAAACTGCTTCACAGATCCTAAATTTATCATGTTTTGTCAAATCTATTCAGATA  
TTCAAATGAGCTGAAATTTAGAGCGGACCTCACGCATCGAAGCATCTTTTATGCACAAAT  
ATTAATCAGGTATCGTCATTTTTTCTAATATTTTTTGAATTTACTGTTTCATGGTAGGTGT  
TGAGGAGCTCGAGAGCCAAATAGCCGTGCTCGTATATATATGCTGAATTCTTATTGTTA  
TTTTCTCTTCTAGAGTGCTAGGGACCTGTTTGGTTGCGTGCATCTAGCCCAACCAGGCT  
CCGGGAAAGCGCAC

>HORVU1Hr1G060770.1 genomic sequence

TGAATTTTGGCATGAGCACGCCCTAATATTCGGTTCCTGTGCACTTGTGAGCGCTCGGAC  
TAGAAAAACGATGAAGCTTGTGCCTTATCCGTGAATGTAGTAAACACTAATAACACGAAG  
CCCAATGTCAACTCTCACGTTCCCCTAAAAAAAAGAAAATGTCAACTCTCACGATAGTT  
TTTCTTTTTCTTTTTAAAAGGCACTCTCATGATGGTTCTTTCCCTTTTATAAAAGGAAA  
AACTCGGGTAACGGGAAAAAAACACTCTCAAACGGGAAGACATTCCAGCGTCCATCCATC  
CAACAAAAAAGCAGACTGTTTCTCGAAAAAAAAGGAAGACCGTGTCGACACGATGAGAC  
CATATCGGCACAACCCCTCCCGTCCGCCCGGTCCCAATCCGATCCCACCGCCAGATA  
CCGATCCAATGGCCGGCGGTGCTGTCGTATCCGCCGTGCGCGACGGCAGCAACAGGAC  
GGGGGTCAGCGCGTGCCTGTCGACCCCTCCCCGCTCGCTGACACGGTAGGACCCACGCCT  
CCGTCGCTGTGGCTTGAAGATTCGCCACTCGCCAAACACCCGCACTGCGCCAGCAGCAC  
CTGCTCTCCGTCACGGCGTCACGCCGTCACCAACCGCACGCGGCACGCCGAACCTCGAGGG  
CCCACGCGCCAGCAGTAGCGCGACTGGCCCCGGCCGCCCTACGCCGCTCACCTACCATTA  
CCAAAGCCTTTCTTCTCCTCCCAGCAGACGACCAATTCGCCCGCCCTCGTCGCGT  
CGCCGGCCGCTTCTCCCCCTCCCACCACGCCCGACGCCTCCGCGGAACCGCGAACGA  
GACCCAGCGTAGCGAGAGCCGATTGGGTGCGCGCGCGCGCGCCGGTTTTTGGGGCTAGGG



CTTGGCTCGTGGTCGCGGTTTCCAGTTCACAGGAAATGGACGCCTCCGACTCCGGCGGGG  
GCGGCGCGGCGGCCGATGCGGGGAACCCGTCTGGGACTGGGACAACCTCCTCGACTTCG  
CCATCCCGGATGACGATTCCCTGCTCCTCCCGTGGGATGACCCACTCGGGATCGAGGGCG  
ATCCCACACCGAGACGGCGCTGCTCCCTGCCCGCCTCCGCCGCAGCCAGTGGAGCCGG  
CGCCTGCGCCACCGTCTCCATCTGTTGAGGCCGGGGCAAGCAGACGCGGCGTCAGAAAGC  
GCGACCCGCGGCTGGTGTGCCCTAACTACCTCGCGGGGATTGTGCCCTGTGCGTGCCCCG  
AGTTGGATGAGATGGCGGCCGCCGCGGAGGTCGAGGAGGTTGCCGCGGAGGTGCTTGCCG  
GTCCGAGGAAGAAGCCCAAGGCCGCCAGCCGGGGTAGCAGCGGGGCGGTAGTCAAACCTG  
GTGGTGGTGGCAGTGGCAGTGGAGTGGCTGCCCGTGGGGGAGCAGCAGAAATGAGGTGCC  
AAGTGCCGGGCTGTGAGGCCGATATACGGGAGCTGAAAGGGTACCACAAGCGGCACCGGG  
TGTGTCTGCGTTGCGCGCACGCGTCTGCCGTCATGCTCGATGGCGTCCAGAAGCGCTACT  
GCCAGCAGTGC GGCAAGTAAGCTACATTTGCCCTTGTTAGTTGCTGAATATAAGTTTGT  
ACAAGACCCATTGTTATTATTAGGATACACAATTGAATACTTGAAATGTTTGTACAGTCT  
TCATCCCCTGACTTAGTTGTAGTTCTTCGATAAGGCAGGTCGTTGGATCACTATTTCCAG  
CTTCCTTCATTGAATTTGTCGAGTTAAGGACTAGTGCAACCGCTACATTTTTTTATTTTT  
GAGTAGAGTTCCTCAGGCATATGCTGTCACGGTTGATTTGTCTTGAGTGTCTTCAAGAT  
TTATGCATTAATTATATTTTGTGGCTTAACTTATCACGAAAGACATGCCGGAGCACA  
ACTTTGTAGCTGTAATGAAGTAATTATGTGAAAACCACTAGACTACCATGCTAGAGTTT  
TTTTTTTCTTGTAGTAGGCTATACTAGTGCGGTGACATGCAATATTTGATGTATGAGCCC  
CTGCAATTCAATTGAAAGCAATCCCGCCAAAATATTCGGATATGCTAGTTACATATTG  
TTTTGTTTGGTCCCAGGATTCAGGCATCCTGGTGGAACCTTATCTAGGATTTGTGCGGACT  
CTCGTGATATTTCCAGTGAATTCCGCTTCAAGTAGAGTTAATAACATAATAATTTTTTC  
GATTAATGGTAGACACACAAACACATGCCTACACCACCACAAGCCACATGTGAGTGCATC  
CCCAAGCACATGCCTAGAATTAGCAAGGGCCGGGAATACATTCGCTATCCCATGAAGTTC  
CCACCGAAGCACATCCGCATCCGCATGAGCAAAAATGCGGGTGCTAGGATTTAAGCATT  
GTGGGTGGAGTCGTACACCACA ACTCCACCAAGAGGTGGTTCCAGAGTTAGTATGCTAT  
AAATGGTCGAGAACTCTCACTGGGTGCAATGGTGGGAACACATGGTTGTGAACACACCCA  
TCTGAGTTCGGGTACTCATCTCGTGTAATGGAAGACAGGTGCGGGGTGGTGGTGGTGATG  
GTGGTGGNNNNNNNNNNNNNNNNNNNNNNNNNNNNNNNNNNNNNNNNNNNNNNNNNNNN  
NNNNNNNNNNNNNNNNNNNNNNNNNNNNNNNNNNNNNNNNNNNNNNNNNNNNNNNNNN  
NNNNNNNNNNNNNNNNNNNNNNNNNNNNNNNNNNNNNNNNNNNNNNNNNNNNNNNNNN  
NNNNNNNNNNNNNNNNNNNNNNNNNNNNNNNNNNNNNNNNNNNNNNNNNNNNNNNNNN  
NNNNNNNNNNNNNNNNNNNNNNNNNNNNNNNNNNNNNNNNNNNNNNNNNNNNNNNNNN  
NNNNNNNNNNNNNNNNNNNNNNNNNNNNNNNNNNNNNNNNNNNNNNNNNNNNNNNNNN  
NNNNNNNNNNNNNNNNNNNNNNNNNNNNNNNNNNNNNNNNNNNNNNNNNNNNNNNNNN  
NNNNNNNNNNNNNNNNNNNNNNNNNNNNNNNNNNNNNNNNNNNNNNNNNNNNNNNNNN  
NNNNNNNNNNNNNGCTATGGATGTGAACATCAATATCTTTTTGGTACTTAAAACCTTCTAG  
AAGAAGACGAGAACATGCTACAACCTACAAGAGATAGAGCAAAGGAAATATCCCAATTT  
TGTGAACCTTTTGCAACAAGAGCATTTTATAGGCAGGAGCTGTGTTCTTCACAATGTTTCA  
CCACCAGAAAGTCAAGAGGAACATCTTTTACCACTTCAAACAAGTCATAACACCACAAC  
CAACAAAACCTAGAATTTAGTTGTTACTTCCAGCTTAAAGGGCACCTTACCTTTAAGCGC  
TTATGCGGAGTTAGCAGCCTTGATATGCAGATGTGGATGGATTACATTCAACACTTTCTC  
GGGTGCATATTAGGGTTGTTGGCTAAGGGGTACA ACTGGACCTAGCCAACCAATAAGGA  
TATAATCCTATTATTAGGAAGCTAGTGATGAGTATATAAGGAAGCTGCCAGCCTTATGTT  
ATTATCATTTTTAATGTGAAGGAACATGAAGAAAATAATCTAGTCTCTCTCTATGTTCTT  
CATTCCAGTCCAGATCCCGTCTTTTCTGAGCCCTTCTCCTGAGTACGCTAGTTAAAT  
TGGTATCAGTGCCTACAGCGTGGCTTTTGCTGCCAACTTTATGGCGCACAGTGTGGTCTG  
AGCACTGAATGAGTTATACATGGAGATCAACAGTGGGAAGAGCTTGCATGCGCGGAGAAA  
ATATGTGGACTTGAGCCACTGCTTCTGTGCTAGCTGCACCAACCCTAGCGGCGTATTTGC  
TGGCCACTTCTCTTCAATGCCATCAGATGGGACTGTAGTACTGAGCCTGTAACCAGCAG  
GAGTGGTATCTGCTCATCAAAGGTGTTGGCTGTTTATGCTCCAGGCTTCCAGAAACCGG  
GTTGATCCACCATGGGACGCCGAGTGTCTAGTCGTTTTCCACTGCACACA ACTTCTCCA

AGCTCTAACCTTTAGATGTGCTTGTGCCTCAGTGGCTCAGTTCAAATCCAGGCCAGGTGG  
TCCTCCATTTAGCACTCAAGCCGAGCCCTCTGCTGTGGACCTTGGCCTGGCCTGCAGTAA  
CAGGGCCAAGATTAGGTAAGTGCTTGGCACTGTTACCACACCCATACATGGGGGCAAATA  
TCTTTGAAACATCACCTTATTCGTCTAGTGAGAATCTCTACATCCCATGAATGTGGGGGG  
TATCAGAGACTTCAGCTAGGGATGAACAAATACTGTTCAACCATAAGTAAGCTGTGTTGC  
AATTTTGTAAACATTGCATCAAGTCTATAAAAACTAAGAACACTGCAGCTCTAGCCATAA  
TTTTGCAACTCGAGAATGAGCTGCTTATCCAGGAGGAGCGGAGTGTGAGGTCCAACCTAG  
GAGTCAGGCGGCAAACCTGAAGGAAGTATTAGCAGCTGGCCCTAATCAACTTAAAGTGTGG  
ATATGTACCTTACAATTAGCAAATCTGAGAATAGTTATATTAGTTAGGTACATGATTGAG  
ATTAGATACTTTAGGGGGGAGACCCATCTATATAATGAGACTGACACATGCTATTACCATC  
AAGAAGTCCTTGAGTTCTTCTACCTAAGTCTCCTCCTTCTTCGCCCTGACATCATTTTCT  
GGTGGTATTTACCCTCATATCAACATAAAATAAAATAAACCATCTCATAACATTTGAAGTTGT  
TTCCAACAAATCAATAGCCTCACTTCAACATAGACATGGTTTTGTTTTGTAGCAATGGATC  
CACATGATCAAAAGAAAAATAACACTCCGAAGTGAAATACAACAAAGTTAAACACCCTCT  
AGCCATTTGTTTAGAGCATGATCCAAAGAAAAAGAACTCCGAAGTGAACCTTGAACATA  
GTTGGTATCTTTGTTGGAATTCTAAGTTTGACCCAATTGAGCTCCAGTAGCAGCAATATC  
TTTATATATGCTTGTTCGGTAGGGTACATTTTAAATGCATATGTTGCTGTTTCAGCTCCCT  
TTCTTCTAATGTTCCCTTTTTTGTGCACTCTGTAAGTATGCGCTGTCTAATCCGGAACATT  
TTTGTTAATATCTTTTGGTATACAGAGAATATAGATGGCGTCGCCCGTGACATGCTTGAG  
ACTGTTCTTAGCAACAAAGTTTTAGACAGAGCAACACCGGTGGGATCTGAAGATGCCGTT  
AGTTCTCCAACCTTGTACACAACCTCAGCTTGCAAATGACCAAAGTAAAAGCATAGTGACT  
TTTGCAGCTTCTGATGAAGCTGCAAAACAGGAAAATGCGAACTTACCAATTCCCCAGTG  
CATGACAGCAAGAGTGCTTATTCATCCTCAGTGAGTTTTTCCCCCATACAAATTTGTTTT  
ACTTCGATGAGATCGTTATTCGTTATTATTTTAGTTTGGTGGAACTTCCCCCTCCCTCC  
CTCCCTACCTCTATAATTGTAGCAGTAATGTTGTAGCACCATTCTAGTGCCCCACAGGAC  
GCATTTTCGTTCAAGTTGTACGACTGGAATCCCGCGGAGTTTCTCGGCGTCTACGTAACC  
AAGTATGTAACCTGTCTATGACCTATAAGGCCTTGTACACTGCAAGGTGCTTAGTAGAATA  
AACCGAGTTTTTCTCAAGCACC AATGCTCATCTGTGCAGGAGGGGTGCCTAATTAAGCGT  
CTACCCTCTACAAATAAGCACCAGTGCTTAAGAAAAACTGGCCTGTTTTTCTAAGCACCT  
CCCCTAAGCACCTTGCANNNNNNNNNNNNNNNNNNNNNNNNNNNNNNNNNNNNNNNNNNN  
NNNNNNNNNNNNNNNNNNNNNNNNNNNNNNNNNNNNNNNNNNNNNNNNNNNNNNNNNN  
NNNNNNNNNNNNNNNNNNNNNNNNNNNNNNNNNNNNNNNNNNNNNNNNNNNNNNNNNN  
NNNNNNNNNNNNNNNNNNNNNNNNNNNNNNNNNNNNNNNNNNNNNNNNNNNNNNNNNN  
NNNNNNNNNNNNNNNNNNNNNNNNNNNNNNNNNNNNNNNNNNNNNNNNNNNNNNNNNN  
NNNNNNNNNNNNNNNNNNNNNNNNNNNNNNNNNNNNNNNNNNNNNNNNNNNNNNNNCCTAA  
GCACCTTGCATTGTACAAGGCCTAAGTTTTTAACAGTGGATGATATTTTCATGTCAAAGA  
AATTATTCTAAGTCAGTGGTACATTTGAAATATGCAGATATTTGAGTGGTTGTCTAGCAT  
GCCTGTTGAATTGGAGGGCTACATTCGTCCCTGGCTGCACAATTTTAACTGTATTTATTGC  
AATGCCACAACATATGTGGGACAAGGTATGGATGTTTCTGCTAAAACAAAATCATCAATT  
ACTTTGATGTGAATGGAGAATTTTGCACACATCCAAATAAAGACAAACTATCAATATTTA  
TTAGCAAAAATCATTTTGTACCGTGTACAATTATGCGAACTGCTAACTGTAGTACTGC  
CATCGGTCCAGAATTGATGTCTTTATGGCTTGTGCGAAGTTAATTTTTTACCACTTATGAG  
ACTGATCATTTCAAAGGAATTTGTTGGATTTGCTGTGAAGAATTTTATTATATGATAAC  
CTTATTAACTTTTATCAACATATCATCGAGTGTCCCAATTCATATCTGCATTTTTCTTG  
ACAGTTATCAGAAGATACAGCAAATCTTGTGAGGAACTTGGTAAATGCTCCGAGCAGTCT  
TCTATTGGATAAAGGGGCCTTTTTTGTTCATGTCAATAACACAATATTTCAAGTATTCAA  
AGGTGTGTGCCATGTACTTTGCAATCCATGACATAAATACTAACCATACTGTTTCTA  
TGTCATTCTTGAACCTGTGTTGTTTGTACACAACATATGTAGTCCCTCCTTTGCTGATTGC  
ATACTGTTTTTGGAAATTTACTCTGCAACAAAGATGTATGCAGAAAAGACTGCATCGTGGA  
AAGTGCCCTTCTGCTCCCGAGCTCANAAGGCGGACAAAAAAAACGATACTCTCAAAT  
GCACGTTTTTCAAGATATCGATTTTGTTTTTGTTTTTTTGTGCGCCCTTATAGGAATGTTA  
TTTCAGACCAAATTTTATATGCACTTAGAACTTTTGTCAATGTTGCTCACAAAAAAAT

CTGAATTTTGGGAATTTTGGCCTGAAATTACTGTTCACCTAGCTCAAATGAGCTCGGGAG  
CAGAACTCTGCATCCCTGCATCCCTGCATCGCCCCCTTTATTGGACAACTTATTACATA  
TGGAAGTTGTGTGTTACTCTAGTCCATATTAATAAATGATTGGAAATAGCCAAGATGGGT  
ATGCAGTGGAAAATTGGTGTAAAGGTTATCTTGAAATGTTAAAATGGCAAGCATTTCATGAA  
CAAAAAAATGTTTTTTTGGAAATGACATGTGAACAGGAACAGAAGGAGTAGCACTGCATGTG  
CTACTGGGCTACTACATGCCGTAGACTCTTTGAATTATGTATCTGCCCAAAGAATCCTC  
TCATGACAATAACAATCCCTTTGTTTTGAATTGTTTCGATGCAAGGATCCTTGTCCCATTCC  
TCTGACATTTGCAGTTTTAATCTATAATTATGTAGTGTTCAAATATTTGAGCATTTCCTCA  
GTTAATGTGGGAACTATTTCCATTTAACCTTTTATAGATTATTGCACCTTTTGTGTTAAA  
CTTTTCATGACAAAAGTATTTGGTTACTAACTGAGGATTTGTAATATCCGTACTTAAGAT  
GGAGCAACATTGATGAGTACCAGATTAGAGGTACAAGCCCCAAGGATCCATTGTGTTTCAT  
CCAACATGGTTTGAAGCAGGAAAGCCTATTGAACTCCTCCTTTGTGGAAGTTCTCTTGAT  
CAGCCTAAATTCAGGTATAATATGCCCTTGGATGTTGTGGTGATTTCTGCTGGCTGTTTT  
TCTACCATGTATCATCACGTGGTACAACACTTTTTGTTTGAAAACCTTCTGTTGTATGTAT  
CATTTTCTAAGCGTAGTGTTTATTGTCACAAATTCGTGATGTGGGCTTACCAGAGACTCC  
ACGGTGAAATTCGATCTTAGCTTCTACTGAAATAAATATGCTCTGTTTCCCCATAACCTC  
GTGTTTTGTATTTTTCCAATGATCTTGTTTAGTTGGTCAAGCCATTAAATGAACCATTCC  
TGGGTTTTAGCCTGTTCCATCACTTGGAGGAACTAAGCGAAGATGAATGCAATGTGACT  
CCAGTATGCATTTCTTTGTTTGGTTTGTTCAGGAACAAACTGTCTTGAGAGCTCCACGC  
CCAATTTCTGCATGAAATAGCTTTAGGGTCCAAATACAAAAAAGTCATTTATCTCCTTTT  
CACAATACCACCTGTTGGGTGGAAAATATGTGGTAATGGAAGTACCTTTTTTTTTGTTGTC  
CAAAAACAAAACAATCAGAAATTTACAGAATACAATGGAGATTAAGGAATGCGGTTGATG  
TTGGCTTTAGAATTGTAACATCTGAATTACTCCGCATTGCACTGCTAGCCTGGTTTTCT  
TAGTCAAACCTGTATAAATCATTGAGGTAGATACTCTTGATAATTGTTGATCATCGGGAG  
AACACTTCTGGTTTATGATCAATGCCCTTCTATTGATATACTTTATGGGTCTTAAGTTTT  
CATTAAATGGATTTTGTTCCTGGTTCTAACATTAAATTTGTGCATGAAGTGGATCCACA  
TTAGATAGTTCTGTATGTAAGCTTCATAGATGAACACTATTTATGCATTTGCTAGGGGT  
TTGCAATTCTCTATGGGTGCTTGAATCACCCTCAGTTTATGTTCTCATGGCAGATCACT  
TCTTTCGTTTGTATGGAGAGTACTTGAAGCATGATTGTTGCCGTCTAACGTCTTATGAAAC  
CTTTGGTTCGCGTGAAAAGTGGTGATCCTACATTTGATTCTCAACAGGAAGTTTTCCGGAT  
AAACATCACTCAAAAAAAGCTGGATACTCATGGACCTGGTTTTGTAGAAGTAAGTGAAC  
TTGCCACAGAACCAATCAAATTCCTCCATACTTTACAGTCTGGTGCATTTTACCTACAGC  
ATTTTTCTGGTGGCATCCATCTAGGATGCATGTGTTGACATAGTTCGGTTATGATACC  
TTGTCAGTCCATATATATATTGTTACTAGTGTGTACGAACCTTAAGCTACAGTTTTATATCT  
TAGCCATGACCAGCCTGACATTTGTACTCCCTCCATCCCAAATAAGTGTCTCAACTTTG  
TACTAGCTCTAGTACAACTTGTACTAAGTTTAAGACAGTTATTTTGGGATGGAGGGAGT  
GCAATTTAATAGAGAACCCTGCTTAGGATGCTTAAGCTCAAGCTATCCCTCCCAAATAGT  
GTGATGTTGAACTGATTACTGAAATAAGGCATCAATACTCGAGAGATATTAGCTGCTCTA  
CAGTACACAGGGATTTTGGGAACCTTGGTTCATATGCACCAACTTTGGTTTGTGCACTTT  
AAGAAGTGAAAAATAACAGCATAGAAGCTGGGCATAATAGAATTGCAAGTTTCTGTACAA  
AAATTAGATCATATGCGCCCTTTGCAAAAACACGAGCAAAAACAGAAGTGCATCAGAAAAT  
ATGTTTATCACAACGACTGGACGATGGAAAGCTATAGGAAAACAAAGTGCATAGTGGGGA  
TTTTTCGGCTAGTAAGCTGTATTATTCTTGGCGCTAACAGTATAGGTGTATAAAACCGGA  
TATTCAAATCGGCACCCAAGAGCATAACGCTCCCGTGGTGAAACAAATGATGATGTTCTTA  
ATGTCAAAGAGATCTGAAAAAGTTATACATGTACATACATGCCTGTCCTATGTGTAGATT  
TAAATTTTCATGGAAAAGGATAAGATTTCTGGTTTGTGTGGGAAAAAATTGGGGCTTCAA  
AATTTGATTTTTTAGAGGATTGGATTTTGTATTATTGTCCAGGACACAAATTATGTCCATG  
AACTTTGCAAGCAGATAAATAACATGAACAGGTATATTATAAAAAAGAACAGAGTTGT  
TTGAATTTTTAACGATTTTACTATTCATCTGGGAGTGTATGCTTGTGGGAGGCAAAACAC  
CGCCTTTGAAAGTAGAGCCAAAATTTACACCTTGAATAACATTATCAAAGAAGACAAA  
AAATTCATTCTTTGTGCTATAATTGCAATATTTAAGGGGTTCCAAAATGGTTCATTGTTG  
CAAGAATAACAATTGCTCCCTCTGTAACTTTTCATAAGACGTTTTTAGGTCACTAAAGACA

TTTTATAAAAGCTTACAGAGGGAGTGCCATTTATGTAAGTGCATGACTGTTCCCTGTTTCAG  
CTTATGTTGTCATTCTTTGACACTTTCTGTAGTCGTCGATTGCAGTTCTATATTTTCAGT  
TCTGTCTTTTTCTTCTACAGGTGGAAAACGTGTTTGGGCTATCAAATTTTGTCCCTATCC  
TTTTCGGTAGCAAACAGTTATGTTTTGAACTAGAGAGGATAACAAGATGCTCTTTGTGGTT  
CTTCCAAGTACAAGAGTGCAAATGGAGAGTTACCTGGTGTTACTTCTAACCCCTTGCGAGC  
TTTGGGAACCTCAACAAACTGCAATGTCGGGATTTCTGATAGAGATTGGGTGGTTATTAA  
AGAAGCCCTCTCCAGATGAATTTAAAAATTTACTAAGTAAAACAAATATCAAGAGATGGA  
TATGTGTGTTGAAGTTCTTGATACAGAACAATTTTATTAATGTTCTTGAAATGATTTTGA  
TGTCATCGGACAACATCATAGGCTCTGAGGTTCTTTCTAACCTAGAAAAGGGGCGATTGG  
AACATCATGTACAGCATTCTTGGATATATAAGACATGCTCGAAACATTGTTGATAATA  
GAGCTAAACACAACGAGGAAACACAGCTTGGAAACAAGGTGGTGTGGTGGTAGTGCTTCAG  
ATCAGCCAAGCTTGGGCACTTCTGTGTCACTTGGTAAAGAAGTAAGTGCTATTGTGTTGC  
AAACCTATTAATTCGAAGCTAAATATTCCTCTGGAACCTGCTAATGCCAGAATTTCTG  
CATGTTTATGCATTTTACATTAGAGCAGTTACAGATTTTCCCTTTTTTAAGCAGAGCGAG  
TTCAAAGATTACATTTAAATGATTTTCAATGTTTCAAGTTGTGGGTTTTATTGAGATTTT  
CTTGTGTAGATGTAATCATCAGCTCATTACCATTGCGTGCTACAAGCATGCAAACACACG  
GTCAGCAGTAAGAAAATCAGGGAAATCATGATACCGAGCACAAATTCTTAGAGGAACATCT  
ATGTATAATGTGTCCTATTTTGTTCATTTAACTTCTATTCCCTCCGTTCCCTAAATATA  
CGTCTTTCTAGAGATTCAACTAAATAATCTTTTTGCAGAATGTTGCTGCCAGCGATGAAT  
CTTGTTTTCCCTCGACCAATGAGTGTGAAGAGGAAGAAAGTGTGCCGCTTGTGACTAATG  
AAGCTGTGTCACACAGGCAGTGCTGCCAGCCTGAGATGAATGCAAGATGTCTTAGTCCCG  
CCTTGGTTGCTCCTTTTCCAGGTGGTGTATGAGAATGCGACTCATCACGACTGTGGCAG  
TGGCTGCTGTATTGTGTTTACGGCCTGTGTTGCCGTGTTCCACCCAGATAGAGTAGGGG  
TGCTTGCAGCTCCAGTAAAGAGGTAAGTGTGTTAGCGACTGCCACCATGGAACCATAGTG  
GATGTTAGATTAGATTAAGTTTCTTGACTTGTGTTGCTCTCCCCTGTGCCATGTGTATA  
CCGTTGTGTCGAGGCATAGATTGTTTGTATCAAGGATAAAATACCTTTTCCAATGGACAA  
TGCAAACCTGCATCTTTTTGACAGAACTATGGGCATATATGCATAAAGTTCTGAACCAC  
CAGGTGTATCAGAGGGTTTGTAGAAAGTGCTTCATTGAAGAAGAGACCGGGTTTCAAAC  
TTCTTTTGTTCGCATGTAGTTGTGCTATTTAGCCTTTTATAACTTTTGACAAGTGAGAAG  
TTTGGAAAGAATCTAACTCGAACAGTTTCTCAAATCCTGTGTCAGAAGATTCATCTGATTT  
GGGGCTTGAATATGATCTGAAGAGTACTCCGTTTCAAACAAAAAATCCTATTCTGCTCTT  
GAGCTCATATGCTCCCTAATGAACAGCAGAATCAAGAAAAATAGTAAAATAATAAAAAAT  
TCTGATTTTTGGGGGTAAACTTTGTATGACATTTGTGGGAAGTGTGGCAAAAAAAGCA  
CTCTAAATGTATTCAAACCTAGTAGCATTTTTGGAAACATCAATTTTGTTTTTTTGCCACA  
ACTTCCACTAATGCCATTTTATCCTGAAATTTTACAAGCATATAAAACATCTGTGGAAGT  
TATCACAACAAAATTCAGATTTTTTTGAATTATTTTACTATTTTTTTGGGTGTTATTGTTC  
ATCAGGGAGCATATACACCAGACCCGTTTCAAATTGTTTTTGGAGGAGTTACCTGTTTCAA  
ATTACATTAAGTTCTAGCTTTGTTTGT

>HORVU0Hr1G039150 genomic sequence

CGAGTTATATGGCTCACGTTCTTCTCGTGCAGGGCTCCGGATTTTCGAAGCTGGTCGGTCGACCGGC  
CCTCGGATGTCTGGAGGGAGCCGGAAATCCGAG  
TTNNNNNNNNNTGGTTCGGTCGACCGGCCCTCGGATGTCCGGAGGGAGCCGGAAATCCGAGTTATA  
GGGCTCACGTTCTTCTGGTGCAGGGCTCCGGATT  
TCCGAAGCCTGTCCGGTCGTCCGACCCTTGACCGGCCCTCGGACGTCCGAAGGGAGCTGGAAGTCCG  
AGGCATTAGACCTGTTTTGAGATAGGAGCAGAGT  
AGAGAATATGTGGTATTGAGCAGAATAGTGGATATCTAGTTTGGAGCAAGTTCATCACAAAACCTG  
TGATCCCCTCTTAATAGTGCGGGATCCCTAAAGA  
ATCAAGAATTGTAAGGGGTACCGATGATCCATACTTGAGTGTATACTTTTATTCGCTGACCATCA  
CTCCGCACCGCTAACATCAAAGTAACTGATACC  
TTGAGTTAGCCCTTCACTTGGAGCTTGTGTTGTTGTTTCTTCTTGGCTCAATGTTGAAAGCACTACA  
TGATGAAGTCTTCAAGTAGCTCTCCCATACAC  
AATGTGGAAAGCCTAGCTTATATATTTATCTTTATTTGTCCACCATGTGAACATCCACAAGGATCAA



AGACCATCTCTTTTACCTGCTCTTTCAGTGAGA  
TCTCTGTTAGTATGCACGTGTGAAGAGTAGCAATGCATTCAAAGGGAAACAGTGGGATCACTTGCA  
GTGTGACACACCATATGGAGACACTCCATATGAG  
TCGGCTGCAAAGCTCCAAGCTGTCTGCGTGGGATCGATGGCAACAGTTTGGGATATATGCTTCTCAT  
GTTTCAGGATCATCATTGCCTAGCTACTGCATTG  
GTCCCCCAGCCGGAATGTTCTTTCGGTCCAGAATTGATCTCTGATCATGCTACTAATTTGTGTCTTACC  
TAGGATTAGGATTTGCAGCCAGCTCATGCATG  
CATGCTATGCTATGGATAGATTGATGATACACCATACACATATGTCCATACTTTTATGTGTATTGTG  
AGTCACACATTAGTATTTTCATGTGTATGCTGTC  
TTTATATAGTTATGTGTTAATTTGTTCTAACCTGTTTTTCATTTTTTCGTTTCAGATTCCATCTGCTTGATG  
AGTTCGACGACGCGAAGAAGAGCTGCAGGAA  
GCGCCTCGCAGACCACAACCGCCGTCGAAGGAAGTCAAAGCCGTCCGACGCCGATGCCGCTGATAA  
AAGGAGGACACAGGCCAGCAAAGCAGCAGCAAGT  
ACCAAAGGCAGTACGTGAAATGCATCCGTCCATGTTTCTCTACCTAATCATGCATTCTCTTGACACA  
TATTCATCAATATTAACCTAGGTTTTTCCTTTA  
ACTTACCAAGTAATTAACACCTCCAAAACTAACAAAGTATTGTGAACAGAAGCAGCCGGAAGCAG  
CAGCAAGAGCACCGGCACCGGAGACGGGATGGAC  
ATTCAGGTGCAGCTGGGGAGCGGAGACCTGTCCAAAGATCAGGACGAAACCATGGGGCAGGGAGA  
GGTGGTGAAGAAATGCAGGTGGATCCCAAGGGGA  
AAGCGTCAATGCAGCTGCAGCAGCAGCAACAGCAAGGACACCACGTCCATGGTCTTCACCTGCAGA  
GCCAACATGGCTTCCCTTTCCCTTCGACCTCTGC  
AGGCTCGTGCTTCCCTCAGAGCCAAGCTGTCTCGAGCACTGACAACACATCAAATATCGGCCAAGT  
GCAGCAAGAACAGCTAGGCTTGGGGTTCATCAG  
CACAGCAACATCCTTCAGCTGGGACAGGCCATGTTTGATCTCGACTTCGATCACTAGCAAATTAGCT  
AATATATAATTAGTAATATTCAATGCTCCCTCT  
CGTACGTGTGTGTACGTCGATCGGATCATCTCTTTCTATCTTGTCTGTATTAATTACCGTAATATGAT  
ATAATAATGGTAGTTTGTCCAGTGGCGATTTT  
CATATATAATTTGGTTAGAGGTGCTTCAATGCCCTCCCAAAGGTGGTACTGGTACAATTCATACATT  
TAGTACCTTTAATTTGCCTCATGTACTTGACAG  
TAGTTATGCTCTTTGTACGTCACTGGCTCACAGTCCAGCTGATTAATGAGTTGGGGCATCAAACG  
TTCACAGTTTCATATATATGAG

>HORVU7Hr1G110950 genomic sequence

CCCGGATAGGCTGGGACGGATCCAATGACGATGAACTAGATCCACCATTGTTCCACCCATGCTGCG  
GTGAGGAGGACAAACGACTGGTGTGAGTATGGGCAT  
CGGCCCTGCGTTGATGGATCGTTTTTCCCTCGAGCCCTGGCGTGTGTGTGTTNNNNNNNNNNNNNNNN  
NNNNNNNNNNNNNNNNNNNNNNNNNNNNNNNNNNNNNNNNNNNNNNNNNNNNNNNNNNNNNNNNNN  
NNNNNNNNNNNNNNNNNNNNNNNNNNNNNNNNNNNNNNNNNNNNNNNNNNNNNNNNNNNNNNNNNN  
NNNNNNNNNNNNNNNNNNNNNNNNNNNNNNNNNNNNNNNNNNNNNNNNNNNNNNNNNNNNNNNNNN  
GGGTTGCTTGACCAATGCATCTGCACTGGGATAGCAGGGACGACGCCTGGCCGCGGGTCTTCAACC  
GGGTCTGGCGGAGCACGAGGTGGAGGGATAGCTG  
CCAATCGTCATGGGCCTCGAGGAGCCCCAATCCACCTTGCTGAGTCTAATCATAACAGGGGCAG  
GAGACCTCAAGGACAGAGAGGAGCGAGAAGTGGG  
AATGAGAGCTAGGTTAGGCTTTGTGGTGGATCGGGCGGAGCGAAATTTTGTGGTGTCTGAGTGGGG  
CCAACCTGTCGGACATGTCCGGACAACCCTATAT  
CCATCCCATATTNNNNNNNNNNNNNNNNNNNNNNNNNNNNNNNNNNNNNNNNNNNNNNNNNNNNNN  
NNNNNNNNNNNNNNNNNNNNNNNNNNNNNNNNNNNNNNNNNNNNNNNNNNNNNNNNNNNNNNNN  
NNNNNNNNNNNNNTGCAATATATTGCAAATATTTTCACAACAACGTGTGGGGTATAACCTAGTTCGT  
CAAGTTCCTAAATTTTCTTGCCAACCGTCGATTT  
TCAGGGCCGTTGGATCATCATCCGACGGCCAAGATCACGCTACAATCTATTTCATCATCTTCCCTCCG  
CTCACGACGATTCCACCTCTGCCCCCGCGACCA  
ATCCGACCCTAACCACCTACCTCTGCCTTCCCCGCGGTAGGGTGGCACTGCCACACACCACCTTGAC  
ACCCTGACCCTCCCTNNGGCGGCGCCGGGGACG

CGGGGAGGATCGGTCTGAACCTCGGCCGGCGGACCTACTTCTCCCCGGGCGACATGATGGCCGTGG  
ACCGGCTCCTGATGCGGTCCCGCCTGGGCGGCGT  
GTTTCGGGCTCGGGTTCGGCGGCCACCACCAGCCGCCGCGCTGCCAGGCCGAGGGCTGCAAGGC  
CGACCTCTCCGGCGCCAAGCACTACCACCGGCGC  
CACAAGGTGTGCGAGTACCACGCCAAGGCGTCCCTCGTCGCCGCCAACGGCAAGCAGCAGCGCTTC  
TGCCAGCAATGCAGCAGGTCAGAGCCAGACCCTC  
CCTCTCTCTCTCTCTCTCCCTCCGTAGAAATGGAACAGTAGTTCTCGATCGTGAGGCGACCTTCTTGC  
AGACGCCTAGTATAGCCAGAGCTAGGTTGCGG  
CCAGGGCTAGGGTAGGGCCACCGGAAGCGGGCTGCCTTTTTTCAGTTCGCGCTCTGACTTGGCTCATG  
TCCATTGTCCGTTGTGGGCTGCCATGGAAAAAG  
CTCTCCGGCCGGCGCGCACTGAGACGACCAGTCATGTCAACCAAAAAAGACAAGAGAAAACACTG  
CTCCATGCCATGGCTTTTGGCCCTGGCACGGTGGAG  
TGCTCTACTAGGTCATGCACCTGCGCGCATCTGCACATGGCCTTCTCTTTCCTTGGTGGTTTTCCGGG  
GGTCGACCGGAGAAGGGATCGTGGAACGGAG  
AGAATCAAAATGGGGAGGGGAAAAGGCTGCGTGCTTCGGGATGCCGCTGCAGAGTGCAGAAGACT  
ATGGTGAGAGGAGGGAGACGATGGCTGATCCGGTG  
CCAGGCTTTTGGCCCTGACCATATCTCTGCGTCGGCCTTTTCTCTTTATCCTCCCATTGACCAATGTTGT  
GGCCGCAGTGCTGCCAGTGGCGACTAGNNNN

Table S4. SBP domain sequences of barley, Arabidopsis, rice and wheat

>HORVU0Hr1G039170  
SCAVDGCRADLSRCRDYHRRHKVCEAHSKTPVVTVAGREMRFCCQCSRFHLLTEFDEAKRSCRKRLDG  
HNRRRRKPQPD

>HORVU7Hr1G051400  
MCQVDDCRADLTSKDYHRRHKVCEIHSKTTKAVVANQMQRFCQCSRFHPLSEFDEGKRSCRRLA  
GHNRRRRKTQPT

>HORVU5Hr1G076380  
SCAVDGCADLSKCRDYHRRHKVCEAHSKTPVVVAGREMRFCCQCSRFHMLAEFDEAKRSCRKRLD  
GHNRRRRKPQVD

>HORVU6Hr1G031450  
RCQVEGCGTELA-AAKEYHRKHRVCEAHTKSPRVVAGQERRFCQCSRFHGLSEFDQKKRSCRRLSD  
HNARRRKPQPD

>HORVU7Hr1G042370  
SCLVDGCHADLRDGRDYHRRHKVCEVHTKSTLVRIKNIEHRFCQCSRFHLVQEFDEGKKSCRSRLEKH  
NGRRRKAQAQ

>HORVU5Hr1G073440  
RCQVEGCGVDLSGGKTYCRHKVCSMHSKAPLVVVAGIEQRFCQCSRFHQLPEFDQGKRSCRRLAG  
HNERRRKP PPG

>HORVU2Hr1G097610  
RCQVEGCHMVLAGAKEYHRRHKVCEAHSKAPRVIVHGAEQRFCQCSRFHAMA-EFDDAKRSCRRLA  
GHNERRRKSAN

>HORVU2Hr1G097580  
RCQVEGCHMVLAGAKEYHRRHKVCEAHSKAPRVIVHGAEQRFCQCSRFHAMA-EFDDAKRSCRRLA  
GHNERRRKSAN

>HORVU6Hr1G030490  
RCQAEGCKTDL-SAAKHYHRRHKVCEYHAKAATVAASGKQQRFCQCSRYVLA-EFDEAKRSCRKRLT  
EHNRRRKPAGA

>HORVU6Hr1G019700  
YQVEGCKVDLSSVKEYHRKHRVCELHSAKPKVVVAGLERRFCQCSRFHALSEFDQKKRSCRRLND  
HNSRRRKPQPE

>HORVU2Hr1G048280  
XXXXERCADL-TEAKRYHRRHKVCEAHSKAAVVVVAGLRQRFCQCSRFHELLEFDDQKRSCRRLA  
GHNERRRKS-SAE

>HORVU3Hr1G094730  
ACSVEGCTADLSRCREYHRRHKVCEAHSKTPVAVAGQQRFCCQCSRFHLLGEFDEVKRSCRKRLDG  
HNRRRRKPQPD

>HORVU7Hr1G110980  
RCQVEDCKADLSGAKHYHRRHKVCEYHAKAALVSTAGKQQRFCQCSRSHVLM-EFDEAKRSCRRLA  
EHNRRRKP-PAAG

>HORVU5Hr1G117190  
ACQVEGCCADLSAAKDYHRRHKVCEMHAKANTAVVGNTVQRFCQCSRFHLLQEFDEGKRSCRRLA  
GHNKRRRKT-RPE

>HORVU1Hr1G060770  
RCQVPGCEADIRELKG-YHKRHRVCLRCAHASAVMLDG-VQKRYCQQCGKXXXXXXXXXXXXXXXXXXXX  
XXXXXXXXXXXXXXXXXXXX

>HORVU0Hr1G039150  
RCQAEGCKADLSGAKRYHRRHKVCEHHSKAPVVVTAGGLHQRFCQCSRFHLLDEFDDAKKSCRKRL  
ADHNRRRKR-SKP

>HORVU7Hr1G110950  
RCQAEGCKADLSGAKHYHRRHKVCEYHAKASLVAANGKQQRFCQCSRSEPXXXXXXXXXXXXXXXXXXXX  
XXXXXXXXXXXX



>AtSPL1

VCQVENCEADLSKVVDYHRRHKVCEMHSKATSATVGGILQRFCQQCSRFLHLLQEFDEGKRSCRRLAG  
HNKRRRKTNP

>AtSPL2

HCQVEGCNLDLSSAKDYHRKHRICENHSKFPKVVVSGVERRFCQQCSRFLHCLSEFDEKKRSCRRLSDH  
NARRRKPNG

>AtSPL3

VCQVESCTADMSKAKQYHKRHKVCQFHAKAPHVRISGLHQRFCQQCSRFLHALSEFDEAKRSCRRLAG  
HNERRRKTSTTD

>AtSPL4

LCQVDRCTADMKEAKLYHRRHKVCEVHAKASSVFLSGLNQRFCQQCSRFLHDLQEFDEAKRSCRRLA  
GHNERRRKSSE

>AtSPL5

LCQVDRCTVNLTEAKQYYRRHRVCEVHAKASAATVAGVRQRFCQQCSRFLHELPEFDEAKRSCRRLAG  
HNERRRKISGD

>AtSPL6

LCQVYGCSKDLSSSKDYHKRHRVCEAHSKTSVVIVNGLEQRFCQQCSRFLHFLSEFDDGKRSCRRLAGH  
NERRRKP

>AtSPL7

RCQVPDCEADISELKGYHKRHRVCLRCATASFVLDGENKRYCQQCGKFHLLPDFDEGKRSCRRLER  
HNNRRRKRK

>AtSPL8

RCQAEGCNADLSHAKHYHRRHKVCEFHSKASTVVAAGLSQRFCQQCSRFLHLLSEFDNGKRSCRRLAD  
HNNRRRKRCHQS

>AtSPL9

RCQVEGCGMDLTNAKGYYSRHRVCGVHSKTPKVTVAGIEQRFCQQCSRFLHQLPEFDLEKRSCRRLAG  
HNERRRKP

>AtSPL10

RCQIDGCELDLSSSKDYHRKHRVCETHSKCPKVVVSGLERRFCQQCSRFLHAVSEFDEKKRSCRRLSHH  
NARRRKP

>AtSPL11

RCQIDGCELDLSSAKGYHRKHKVCEKHSKCPKVSVSGLERRFCQQCSRFLHAVSEFDEKKRSCRRLSHH  
NARRRKP

>AtSPL12

CCQVDNCGADLSKVVDYHRRHKVCEIHSKATTALVGGIMQRFCQQCSRFLHVLEEFDEGKRSCRRLAG  
HNKRRRKAN

>AtSPL13A

ICLVDGCDSDFSNCREYHKRHKVCDVHSKTPVVTINGHKQRFCQQCSRFLHLEEFDEGKRSCRRLDGH  
NRRRKP

>AtSPL14

MCQVDNCTEDLSHAKDYHRRHKVCEVHSKATKALVGKQMQRFCQQCSRFLHLLSEFDEGKRSCRRLA  
GHNRRRKR

>AtSPL15

RCQVEGCRMDLSNVKAYYSRHKVCCIHSKSSKVVVSGLHQRFCQQCSRFLHQLSEFDLEKRSCRRLACH  
NERRRKP

>AtSPL16

KCQVDNCKEDLSIAKDYHRRHKVCEVHSKATKALVGKQMQRFCQQCSRFLHLLSEFDEGKRSCRRLDG  
HNNRRRKT

>OsSPL1

CCQVDGCTVNLSSARDYNKRHKVCEVHTKSGVVRIKNVEHRFCQQCSRFLHLLQEFDEGKKSCSRSLAQ  
HNNRRRKR

>OsSPL2

ACSVEGCAADLSKCVRDYHRRHKVCEAHSKTAVVTVAGQQQRFCCQCSRFFHLLGEFDEEKRSCRKRL  
DGHNKRRRKPPD  
>OsSPL3  
HCQVEGCNVDLSSAKPYHRKHRVCEPHSKTLKVIVAGLERRFCQQCSRFFHGLAEFDQKKRSCRRLHD  
HNARRRKPPQPE  
>OsSPL4  
RCQVEGCGVELVGVKDYHRKHRVCEAHSKFPRVVVAGQERRFCQQCSRFFHALSEFDQKKRSCRRLY  
DHNARRRKPPQTD  
>OsSPL5  
RCQAEGCKADLSAAKHYYHRRHKVCFDFAKAAAVLAAGKQQRFCQQCSRFFHVLAEFDEAKRSCRKRLT  
EHNRRRKPTAG  
>OsSPL6  
ACQVEGCTADLTGVRDYHRRHKVCEMHAKATTA VVGNTVQRFCQQCSRFFHPLQEFDEGKRSCRRLA  
GHNRRRKTRPE  
>OsSPL7  
RCQVEGCDITLQGVKEYHRRHKVCEVHAKAPRVVHVGTEQRFCQQCSRFFHVLAEFDDAKKSCRRLA  
GHNERRRSNAS  
>OsSPL8  
RCQAEGCKADLSSAKRYHRRHKVCEHHSKAPVVVTAGGLHQRFCQQCSRFFHLLDEFDDAKKSCRKRL  
ADHNRRRKSKPS  
>OsSPL9  
KCQVPGCEADIRELKGYYHRRHRVCLRCAHAAAVMLDGVQKRYCQQCGKFHILLDFDEDKRSCRKLE  
RHNKRRRKPPDS  
>OsSPL10  
RCQAEGCKADLSGAKHYHRRHKVCEYHAKASVVAASGKQQRFCQQCSRFFHVLTEFDEAKRSCRKRLA  
EHNRRRKPAAA  
>OsSPL11  
RCQVEGCGLELGGYKEYYRKHRVCEPHTKCLR VVVAGQDRRFCQQCSRFFHAPSEFDQEKRSCRRLSD  
HNARRRKPPQTD  
>OsSPL12  
YCQVEGCKVDLSSAREYHRKHKVCEAHSKAPKVIVSGLERRFCQQCSRFFHGLAEFDQKKKSCRRLSD  
HNARRRKPPQE  
>OsSPL13  
RCQVERCGVDLSEAGRYNRRHKVCQTHSKEPVVLVAGLRQRFCQQCSRFFHELTEFDDAKRSCRRLAG  
HNERRRKSAAAD  
>OsSPL14  
RCQVEGCGADLSGIKNYYCRHKVCFMHSKAPRVV VAGLEQRFCQQCSRFFHLLPEFDQGKRSCRRLAG  
HNERRRPQTP  
>OsSPL15  
MCQVDDCRADLTNAKDYHRRHKVCEIHGKTTKALVGNQMQRFCQQCSRFFHPLSEFDEGKRSCRRLA  
GHNRRRKTPQPT  
>OsSPL16  
SCAVDGCKEDLSKCRDYHRRHKVCEAHSKTPLVVVSGREMRFCCQCSRFFHLLQEFDEAKRSCRKRLDG  
HNRRRRKPPD  
>OsSPL17  
RCQVEGCGVDLSGVKPYCRHKVCYMHAKAPIVVVAGLEQRFCQQCSRCSVHMVRFHQLPEFDQEKK  
SCRRLAGHNERRRKPTPG  
>OsSPL18  
SCAVDGCKADLSKHRDYHRRHKVCEPHSKTPVVVSGREMRFCCQCSRFFHLLGEFDEAKRSCRKRLDG  
HNRRRRKPPAD  
>TaSPL1  
SCQVDGCHADLSDDRKYHRRHKVCEPHTKSTLVRIKNIHRFCQQCSRFFHLVQEFDEGKKSCRSLATH

NRRRRKAPAE

>TaSPL3

YCQVEGCKVDLSSVKDYHRKHRVCELHSAKPKVVVAGLERRFCQQCSRFBALAEFDQKKRSCRRRLN  
DHNSRRRKQPPE

>TaSPL6

ACQVEGCCADLSAAKDYHRRHKVCEMHAKANTAVVGNTVQRFCCQCSRFBLLQEFDEGKRSCRRRLA  
GHNKRRRKTRPE

>TaSPL8

RCQAEGCKADLSGAKRYHRRHKVCEHHSKAPVVVVTAGGLHQRFCQQCSRFBLLDEFDDAKKSCRKRL  
ADHNRRRRKSKPS

>TaSPL15

MCQVDDCRADLTSADYHRRHKVCEIHSKTTKAVVGNQMQRFCQQCSRFBPLSEFDEGKRSCRRRLA  
GHNRRRRKTQPT

>TaSPL17

RCQVEGCGVDLSGAKQYHSRHKVCSMHTKEPRVVVAGLEQRFCQQCSRFBQLPEFDQGKRSCRRRLA  
GHNERRRKAPPG

>TaSPL20

RCQVXDCXADLSGAKHYHRRHKVCEYHAKAXLVSAAGKQQRFCQQCSRFBVLTEFDEAKRSCRRRLA  
EHNRRRRKPAAG

>TaSPL21

RCQAEGCKADLSAAKHYHRRHKVCEYHAKAATVAASGKQQRFCQQCSRFBVLAEFDEAKRSCRKRLT  
EHNRRRRKPAGA

>TaSPL22

RCQAEGCKADLSGAKHYHRRHKVCEYHAKASLVAAAGKQQRFCQQCSRFBVLTEFDEAKRSCRKRLA  
EHNRRRRKPASS

>TaSPL23

PCSVEGCTADLSRCREYHRRHKVCEAHSKTPVVAVAGQQRFCCQCSRFBLLGEFDEVKRSCRKRLDG  
HNRRRRKPQPD

**Table S5.** Details of miR156 complementary site in *HvSPL* genes.

| miRNA_Acc.   | Target_Acc.      | Expectation | UPE\$ | miRNA_start | miRNA_end | Target_start | Target_end | miRNA_aligned_fragment  | Target_aligned_fragment     | Inhibition | Multiplicity |
|--------------|------------------|-------------|-------|-------------|-----------|--------------|------------|-------------------------|-----------------------------|------------|--------------|
| hvu-miR156a  | HORVU5Hr1G076380 | 1           | -1    | 1           | 21        | 4216         | 4236       | UGACAGAAGAGAGUGAGCACA   | UGUGCUCUCUCUCUUCUGUCA       | Cleavage   | 1            |
| hvu-miR156a  | HORVU3Hr1G094730 | 1           | -1    | 1           | 21        | 3542         | 3562       | UGACAGAAGAGAGUGAGCACA   | UGUGCUCUCUCUCUUCUGUCA       | Cleavage   | 1            |
| hvu-miR156a  | HORVU0Hr1G039170 | 1           | -1    | 1           | 21        | 5953         | 5973       | UGACAGAAGAGAGUGAGCACA   | UGUGCUCUCUCUCUUCUGUCA       | Cleavage   | 1            |
| hvu-miR156a  | HORVU5Hr1G073440 | 1           | -1    | 1           | 21        | 3463         | 3483       | UGACAGAAGAGAGUGAGCACA   | UGUGCUCUCUCUCUUCUGUCA       | Cleavage   | 1            |
| hvu-miR156a  | HORVU6Hr1G031450 | 1           | -1    | 1           | 21        | 4119         | 4139       | UGACAGAAGAGAGUGAGCACA   | CGUGCUCUCUCUCUUCUGUCA       | Cleavage   | 1            |
| hvu-miR156a  | HORVU6Hr1G019700 | 1           | -1    | 1           | 21        | 6811         | 6831       | UGACAGAAGAGAGUGAGCACA   | CAUGCUCUCUCUCUUCUGUCA       | Cleavage   | 1            |
| hvu-miR156a  | HORVU2Hr1G048280 | 1           | -1    | 1           | 21        | 8382         | 8402       | UGACAGAAGAGAGUGAGCACA   | CAUGCUCUCUCUCUUCUGUCA       | Cleavage   | 1            |
| hvu-miR156b  | HORVU5Hr1G076380 | 1           | -1    | 1           | 21        | 4216         | 4236       | UGACAGAAGAGAGUGAGCACA   | UGUGCUCUCUCUCUUCUGUCA       | Cleavage   | 1            |
| hvu-miR156b  | HORVU5Hr1G073440 | 1           | -1    | 1           | 21        | 3463         | 3483       | UGACAGAAGAGAGUGAGCACA   | UGUGCUCUCUCUCUUCUGUCA       | Cleavage   | 1            |
| hvu-miR156b  | HORVU0Hr1G039170 | 1           | -1    | 1           | 21        | 5953         | 5973       | UGACAGAAGAGAGUGAGCACA   | UGUGCUCUCUCUCUUCUGUCA       | Cleavage   | 1            |
| hvu-miR156b  | HORVU3Hr1G094730 | 1           | -1    | 1           | 21        | 3542         | 3562       | UGACAGAAGAGAGUGAGCACA   | UGUGCUCUCUCUCUUCUGUCA       | Cleavage   | 1            |
| hvu-miR156b  | HORVU6Hr1G031450 | 1           | -1    | 1           | 21        | 4119         | 4139       | UGACAGAAGAGAGUGAGCACA   | CGUGCUCUCUCUCUUCUGUCA       | Cleavage   | 1            |
| hvu-miR156b  | HORVU6Hr1G019700 | 1           | -1    | 1           | 21        | 6811         | 6831       | UGACAGAAGAGAGUGAGCACA   | CAUGCUCUCUCUCUUCUGUCA       | Cleavage   | 1            |
| hvu-miR156b  | HORVU2Hr1G048280 | 1           | -1    | 1           | 21        | 8382         | 8402       | UGACAGAAGAGAGUGAGCACA   | CAUGCUCUCUCUCUUCUGUCA       | Cleavage   | 1            |
| hvu-miR5049c | HORVU6Hr1G019700 | 2.5         | -1    | 1           | 23        | 6478         | 6500       | AGACAAUUUUUUUGGGACGGAGG | CCUCCGUCUCAAUUUUUGGGACGGAGG | Cleavage   | 1            |
| hvu-miR5049c | HORVU1Hr1G060770 | 2.5         | -1    | 1           | 23        | 9210         | 9232       | AGACAAUUUUUUUGGGACGGAGG | CCUCCAUCCCAUUUUUGGGACGGAGG  | Cleavage   | 1            |

**Table S6.** Details of splice variants produced from *HvSPL* genes.

|                         |                                                           |      |         |                |
|-------------------------|-----------------------------------------------------------|------|---------|----------------|
| <b>HORVU0Hr1G039170</b> | Chromosome chrUn: 248,141,188-248,147,114 reverse strand. |      |         |                |
| Name                    | Transcript ID                                             | bp   | Protein | Biotype        |
| Novel                   | HORVU0Hr1G039170.1                                        | 2625 | 290aa   | Protein coding |
| Novel                   | HORVU0Hr1G039170.3                                        | 2507 | 227aa   | Protein coding |
| Novel                   | HORVU0Hr1G039170.5                                        | 1845 | 394aa   | Protein coding |
| Novel                   | HORVU0Hr1G039170.7                                        | 1631 | 52aa    | Protein coding |
| Novel                   | HORVU0Hr1G039170.8                                        | 1456 | 58aa    | Protein coding |
| Novel                   | HORVU0Hr1G039170.4                                        | 1369 | 212aa   | Protein coding |
| Novel                   | HORVU0Hr1G039170.6                                        | 1249 | 400aa   | Protein coding |
| Novel                   | HORVU0Hr1G039170.2                                        | 985  | 272aa   | Protein coding |
| Novel                   | HORVU0Hr1G039170.9                                        | 365  | 120aa   | Protein coding |
| <b>HORVU7Hr1G051400</b> | Chromosome chr7H: 192,879,289-192,885,430 reverse strand. |      |         |                |
| Name                    | Transcript ID                                             | bp   | Protein | Biotype        |
| Novel                   | HORVU7Hr1G051400.1                                        | 4960 | 732aa   | Protein coding |
| Novel                   | HORVU7Hr1G051400.3                                        | 4884 | 1130aa  | Protein coding |
| Novel                   | HORVU7Hr1G051400.2                                        | 4874 | 1130aa  | Protein coding |
| Novel                   | HORVU7Hr1G051400.5                                        | 4723 | 612aa   | Protein coding |
| Novel                   | HORVU7Hr1G051400.4                                        | 4624 | 612aa   | Protein coding |
| Novel                   | HORVU7Hr1G051400.6                                        | 4444 | 613aa   | Protein coding |
| Novel                   | HORVU7Hr1G051400.7                                        | 3837 | 508aa   | Protein coding |
| Novel                   | HORVU7Hr1G051400.9                                        | 3372 | 609aa   | Protein coding |
| Novel                   | HORVU7Hr1G051400.8                                        | 3321 | 1106aa  | Protein coding |
| Novel                   | HORVU7Hr1G051400.10                                       | 1131 | 237aa   | Protein coding |
| <b>HORVU5Hr1G076380</b> | Chromosome chr5H: 551,053,196-551,057,389 reverse strand. |      |         |                |
| Name                    | Transcript ID                                             | bp   | Protein | Biotype        |
| Novel                   | HORVU5Hr1G076380.2                                        | 3828 | 159aa   | Protein coding |
| Novel                   | HORVU5Hr1G076380.1                                        | 1727 | 159aa   | Protein coding |
| Novel                   | HORVU5Hr1G076380.3                                        | 1652 | 159aa   | Protein coding |
| Novel                   | HORVU5Hr1G076380.6                                        | 1636 | 159aa   | Protein coding |
| Novel                   | HORVU5Hr1G076380.9                                        | 1179 | 392aa   | Protein coding |
| Novel                   | HORVU5Hr1G076380.8                                        | 1137 | 264aa   | Protein coding |
| Novel                   | HORVU5Hr1G076380.4                                        | 1124 | 306aa   | Protein coding |
| Novel                   | HORVU5Hr1G076380.7                                        | 1084 | 279aa   | Protein coding |
| Novel                   | HORVU5Hr1G076380.11                                       | 1002 | 333aa   | Protein coding |
| Novel                   | HORVU5Hr1G076380.10                                       | 996  | 331aa   | Protein coding |
| Novel                   | HORVU5Hr1G076380.5                                        | 917  | 159aa   | Protein coding |
| <b>HORVU6Hr1G031450</b> | Chromosome chr6H: 133,169,150-133,173,306 reverse strand. |      |         |                |
| Name                    | Transcript ID                                             | bp   | Protein | Biotype        |

|                         |                                                           |      |         |                |
|-------------------------|-----------------------------------------------------------|------|---------|----------------|
| Novel                   | HORVU6Hr1G031450.3                                        | 2870 | 209aa   | Protein coding |
| Novel                   | HORVU6Hr1G031450.7                                        | 2659 | 113aa   | Protein coding |
| Novel                   | HORVU6Hr1G031450.10                                       | 2571 | 182aa   | Protein coding |
| Novel                   | HORVU6Hr1G031450.4                                        | 2196 | 191aa   | Protein coding |
| Novel                   | HORVU6Hr1G031450.1                                        | 1740 | 104aa   | Protein coding |
| Novel                   | HORVU6Hr1G031450.9                                        | 1640 | 184aa   | Protein coding |
| Novel                   | HORVU6Hr1G031450.2                                        | 1523 | 184aa   | Protein coding |
| Novel                   | HORVU6Hr1G031450.6                                        | 1429 | 326aa   | Protein coding |
| Novel                   | HORVU6Hr1G031450.5                                        | 1030 | 104aa   | Protein coding |
| Novel                   | HORVU6Hr1G031450.8                                        | 1020 | 104aa   | Protein coding |
| <b>HORVU7Hr1G042370</b> | Chromosome chr7H: 122,553,615-122,558,679 forward strand. |      |         |                |
| Name                    | Transcript ID                                             | bp   | Protein | Biotype        |
| Novel                   | HORVU7Hr1G042370.5                                        | 3086 | 328aa   | Protein coding |
| Novel                   | HORVU7Hr1G042370.10                                       | 2775 | 245aa   | Protein coding |
| Novel                   | HORVU7Hr1G042370.7                                        | 2685 | 541aa   | Protein coding |
| Novel                   | HORVU7Hr1G042370.8                                        | 2526 | 841aa   | Protein coding |
| Novel                   | HORVU7Hr1G042370.14                                       | 2251 | 328aa   | Protein coding |
| Novel                   | HORVU7Hr1G042370.6                                        | 2247 | 389aa   | Protein coding |
| Novel                   | HORVU7Hr1G042370.13                                       | 2104 | 328aa   | Protein coding |
| Novel                   | HORVU7Hr1G042370.9                                        | 2008 | 512aa   | Protein coding |
| Novel                   | HORVU7Hr1G042370.20                                       | 1988 | 328aa   | Protein coding |
| Novel                   | HORVU7Hr1G042370.18                                       | 1957 | 328aa   | Protein coding |
| Novel                   | HORVU7Hr1G042370.12                                       | 1929 | 328aa   | Protein coding |
| Novel                   | HORVU7Hr1G042370.15                                       | 1915 | 328aa   | Protein coding |
| Novel                   | HORVU7Hr1G042370.19                                       | 1825 | 328aa   | Protein coding |
| Novel                   | HORVU7Hr1G042370.16                                       | 1781 | 500aa   | Protein coding |
| Novel                   | HORVU7Hr1G042370.11                                       | 1747 | 328aa   | Protein coding |
| Novel                   | HORVU7Hr1G042370.1                                        | 1701 | 221aa   | Protein coding |
| Novel                   | HORVU7Hr1G042370.3                                        | 1443 | 306aa   | Protein coding |
| Novel                   | HORVU7Hr1G042370.4                                        | 1417 | 221aa   | Protein coding |
| Novel                   | HORVU7Hr1G042370.2                                        | 1302 | 221aa   | Protein coding |
| Novel                   | HORVU7Hr1G042370.17                                       | 1081 | 189aa   | Protein coding |
| <b>HORVU5Hr1G073440</b> | Chromosome chr5H: 539,014,598-539,018,210 forward strand. |      |         |                |
| Name                    | Transcript ID                                             | bp   | Protein | Biotype        |
| Novel                   | HORVU5Hr1G073440.12                                       | 3082 | 196aa   | Protein coding |
| Novel                   | HORVU5Hr1G073440.13                                       | 2977 | 301aa   | Protein coding |
| Novel                   | HORVU5Hr1G073440.4                                        | 2513 | 198aa   | Protein coding |
| Novel                   | HORVU5Hr1G073440.7                                        | 1616 | 416aa   | Protein coding |
| Novel                   | HORVU5Hr1G073440.6                                        | 1613 | 415aa   | Protein coding |
| Novel                   | HORVU5Hr1G073440.14                                       | 1483 | 82aa    | Protein coding |
| Novel                   | HORVU5Hr1G073440.10                                       | 1413 | 363aa   | Protein coding |

|                         |                                                           |      |         |                |
|-------------------------|-----------------------------------------------------------|------|---------|----------------|
| Novel                   | HORVU5Hr1G073440.9                                        | 1413 | 363aa   | Protein coding |
| Novel                   | HORVU5Hr1G073440.11                                       | 1261 | 196aa   | Protein coding |
| Novel                   | HORVU5Hr1G073440.8                                        | 1185 | 394aa   | Protein coding |
| Novel                   | HORVU5Hr1G073440.5                                        | 1153 | 384aa   | Protein coding |
| Novel                   | HORVU5Hr1G073440.1                                        | 647  | 215aa   | Protein coding |
| Novel                   | HORVU5Hr1G073440.2                                        | 644  | 214aa   | Protein coding |
| Novel                   | HORVU5Hr1G073440.3                                        | 636  | 212aa   | Protein coding |
| <b>HORVU2Hr1G097610</b> | Chromosome chr2H: 679,689,970-679,692,277 forward strand. |      |         |                |
| Name                    | Transcript ID                                             | bp   | Protein | Biotype        |
| Novel                   | HORVU2Hr1G097610.1                                        | 2156 | 203aa   | Protein coding |
| Novel                   | HORVU2Hr1G097610.2                                        | 559  | 125aa   | Protein coding |
| <b>HORVU2Hr1G097580</b> | Chromosome chr2H: 679,640,052-679,642,809 forward strand. |      |         |                |
| Name                    | Transcript ID                                             | bp   | Protein | Biotype        |
| Novel                   | HORVU2Hr1G097580.1                                        | 2606 | 209aa   | Protein coding |
| Novel                   | HORVU2Hr1G097580.2                                        | 552  | 122aa   | Protein coding |
| <b>HORVU6Hr1G030490</b> | Chromosome chr6H: 127,986,525-127,990,179 forward strand. |      |         |                |
| Name                    | Transcript ID                                             | bp   | Protein | Biotype        |
| Novel                   | HORVU6Hr1G030490.3                                        | 1727 | 473aa   | Protein coding |
| Novel                   | HORVU6Hr1G030490.2                                        | 1711 | 491aa   | Protein coding |
| Novel                   | HORVU6Hr1G030490.1                                        | 884  | 294aa   | Protein coding |
| Novel                   | HORVU6Hr1G030490.4                                        | 797  | 142aa   | Protein coding |
| <b>HORVU6Hr1G019700</b> | Chromosome chr6H: 53,909,817-53,916,886 reverse strand.   |      |         |                |
| Name                    | Transcript ID                                             | bp   | Protein | Biotype        |
| Novel                   | HORVU6Hr1G019700.1                                        | 7070 | 232aa   | Protein coding |
| Novel                   | HORVU6Hr1G019700.2                                        | 4686 | 474aa   | Protein coding |
| Novel                   | HORVU6Hr1G019700.17                                       | 4575 | 384aa   | Protein coding |
| Novel                   | HORVU6Hr1G019700.10                                       | 4312 | 232aa   | Protein coding |
| Novel                   | HORVU6Hr1G019700.4                                        | 3625 | 474aa   | Protein coding |
| Novel                   | HORVU6Hr1G019700.16                                       | 3273 | 384aa   | Protein coding |
| Novel                   | HORVU6Hr1G019700.11                                       | 3240 | 232aa   | Protein coding |
| Novel                   | HORVU6Hr1G019700.3                                        | 3212 | 507aa   | Protein coding |
| Novel                   | HORVU6Hr1G019700.9                                        | 3133 | 232aa   | Protein coding |
| Novel                   | HORVU6Hr1G019700.6                                        | 3118 | 474aa   | Protein coding |
| Novel                   | HORVU6Hr1G019700.13                                       | 2933 | 474aa   | Protein coding |
| Novel                   | HORVU6Hr1G019700.18                                       | 2912 | 366aa   | Protein coding |
| Novel                   | HORVU6Hr1G019700.12                                       | 2788 | 474aa   | Protein coding |
| Novel                   | HORVU6Hr1G019700.5                                        | 2553 | 474aa   | Protein coding |
| Novel                   | HORVU6Hr1G019700.15                                       | 2203 | 474aa   | Protein coding |
| Novel                   | HORVU6Hr1G019700.7                                        | 2158 | 474aa   | Protein coding |
| Novel                   | HORVU6Hr1G019700.14                                       | 1868 | 474aa   | Protein coding |
| Novel                   | HORVU6Hr1G019700.8                                        | 1063 | 180aa   | Protein coding |

|                         |                                                           |      |         |                |
|-------------------------|-----------------------------------------------------------|------|---------|----------------|
| Novel                   | HORVU6Hr1G019700.19                                       | 949  | 289aa   | Protein coding |
| Novel                   | HORVU6Hr1G019700.20                                       | 897  | 283aa   | Protein coding |
| <b>HORVU2Hr1G048280</b> | Chromosome chr2H: 269,391,017-269,400,061 reverse strand. |      |         |                |
| Name                    | Transcript ID                                             | bp   | Protein | Biotype        |
| Novel                   | HORVU2Hr1G048280.1                                        | 1375 | 105aa   | Protein coding |
| Novel                   | HORVU2Hr1G048280.2                                        | 588  | 195aa   | Protein coding |
| Novel                   | HORVU2Hr1G048280.3                                        | 571  | 190aa   | Protein coding |
| Novel                   | HORVU2Hr1G048280.4                                        | 235  | 78aa    | Protein coding |
| <b>HORVU3Hr1G094730</b> | Chromosome chr3H: 647,368,957-647,372,642 reverse strand. |      |         |                |
| Name                    | Transcript ID                                             | bp   | Protein | Biotype        |
| Novel                   | HORVU3Hr1G094730.5                                        | 2272 | 227aa   | Protein coding |
| Novel                   | HORVU3Hr1G094730.9                                        | 1733 | 328aa   | Protein coding |
| Novel                   | HORVU3Hr1G094730.8                                        | 1663 | 256aa   | Protein coding |
| Novel                   | HORVU3Hr1G094730.1                                        | 1630 | 429aa   | Protein coding |
| Novel                   | HORVU3Hr1G094730.2                                        | 1630 | 429aa   | Protein coding |
| Novel                   | HORVU3Hr1G094730.3                                        | 1610 | 426aa   | Protein coding |
| Novel                   | HORVU3Hr1G094730.7                                        | 1582 | 357aa   | Protein coding |
| Novel                   | HORVU3Hr1G094730.6                                        | 1477 | 227aa   | Protein coding |
| Novel                   | HORVU3Hr1G094730.4                                        | 1344 | 295aa   | Protein coding |
| Novel                   | HORVU3Hr1G094730.10                                       | 1307 | 345aa   | Protein coding |
| Novel                   | HORVU3Hr1G094730.11                                       | 610  | 199aa   | Protein coding |
| Novel                   | HORVU3Hr1G094730.12                                       | 356  | 118aa   | Protein coding |
| <b>HORVU7Hr1G110980</b> | Chromosome chr7H: 631,945,657-631,949,862 forward strand. |      |         |                |
| Name                    | Transcript ID                                             | bp   | Protein | Biotype        |
| Novel                   | HORVU7Hr1G110980.2                                        | 1749 | 365aa   | Protein coding |
| Novel                   | HORVU7Hr1G110980.5                                        | 1726 | 424aa   | Protein coding |
| Novel                   | HORVU7Hr1G110980.4                                        | 1724 | 423aa   | Protein coding |
| Novel                   | HORVU7Hr1G110980.3                                        | 1710 | 449aa   | Protein coding |
| Novel                   | HORVU7Hr1G110980.7                                        | 1431 | 171aa   | Protein coding |
| Novel                   | HORVU7Hr1G110980.6                                        | 1214 | 292aa   | Protein coding |
| Novel                   | HORVU7Hr1G110980.1                                        | 904  | 237aa   | Protein coding |
| <b>HORVU5Hr1G117190</b> |                                                           |      |         |                |
|                         | Chromosome chr5H: 650,559,269-650,565,702 reverse strand. |      |         |                |
| Name                    | Transcript ID                                             | bp   | Protein | Biotype        |
| Novel                   | HORVU5Hr1G117190.3                                        | 3817 | 473aa   | Protein coding |
| Novel                   | HORVU5Hr1G117190.4                                        | 3774 | 473aa   | Protein coding |
| Novel                   | HORVU5Hr1G117190.2                                        | 3723 | 498aa   | Protein coding |
| Novel                   | HORVU5Hr1G117190.1                                        | 3661 | 473aa   | Protein coding |
| Novel                   | HORVU5Hr1G117190.5                                        | 3584 | 964aa   | Protein coding |
| Novel                   | HORVU5Hr1G117190.6                                        | 2333 | 442aa   | Protein coding |
| <b>HORVU1Hr1G060770</b> | Chromosome chr1H: 441,051,831-441,063,137 forward strand. |      |         |                |



| Name                    | Transcript ID                      | bp   | Protein | Biotype        |
|-------------------------|------------------------------------|------|---------|----------------|
| Novel                   | HORVU1Hr1G060770.2                 | 2940 | 573aa   | Protein coding |
| Novel                   | HORVU1Hr1G060770.3                 | 2631 | 235aa   | Protein coding |
| Novel                   | HORVU1Hr1G060770.4                 | 2544 | 641aa   | Protein coding |
| Novel                   | HORVU1Hr1G060770.6                 | 2535 | 643aa   | Protein coding |
| Novel                   | HORVU1Hr1G060770.5                 | 2531 | 567aa   | Protein coding |
| Novel                   | HORVU1Hr1G060770.10                | 2366 | 486aa   | Protein coding |
| Novel                   | HORVU1Hr1G060770.8                 | 2283 | 598aa   | Protein coding |
| Novel                   | HORVU1Hr1G060770.9                 | 1906 | 468aa   | Protein coding |
| Novel                   | HORVU1Hr1G060770.1                 | 1287 | 325aa   | Protein coding |
| Novel                   | HORVU1Hr1G060770.7                 | 880  | 83aa    | Protein coding |
| Novel                   | HORVU1Hr1G060770.11                | 832  | 277aa   | Protein coding |
| <b>HORVU0Hr1G039150</b> | chrUn:248118980..248122768 forward |      |         |                |
| Name                    | Transcript ID                      | bp   | Protein | Biotype        |
| Novel                   | HORVU0Hr1G039150.3                 | 1423 | 362     | Protein coding |
| Novel                   | HORVU0Hr1G039150.2                 | 1420 | 361     | Protein coding |
| Novel                   | HORVU0Hr1G039150.4                 | 1162 | 349     | Protein coding |
| Novel                   | HORVU0Hr1G039150.5                 | 994  | 120     | Protein coding |
| Novel                   | HORVU0Hr1G039150.1                 | 1152 | 383     | Protein coding |





## HORVU2Hr1G048280

| miRNA_Acc.  | Target_Acc.        | Expectatic | UPES | miRNA_start | miRNA_end | Target_start | Target_end | miRNA_aligned_fragment | Target_aligned_fragment | Inhibition | Target_Desc.        | Multiplicity |
|-------------|--------------------|------------|------|-------------|-----------|--------------|------------|------------------------|-------------------------|------------|---------------------|--------------|
| hvu-miR156a | HORVU2Hr1G048280.1 | 1          | -1   | 1           | 21        | 112          | 132        | UGACAGAAGAGAGUGAGCACA  | CAUGCUCUCCUCUCUCUGUCA   | Cleavage   | cdna:protein_coding | 1            |
| hvu-miR156b | HORVU2Hr1G048280.1 | 1          | -1   | 1           | 21        | 112          | 132        | UGACAGAAGAGAGUGAGCACA  | CAUGCUCUCCUCUCUCUGUCA   | Cleavage   | cdna:protein_coding | 1            |

**Table S8.** Primer sequences used in this study.

| <b>Primer Names</b>  | <b>Primer sequences</b>   |
|----------------------|---------------------------|
| <i>HvSPL3_qFP</i>    | GATGTCTGTGGAGGGCAGAG      |
| <i>HvSPL3_qRP</i>    | CTTGCAGCCTTCAACCTGAC      |
| <i>HvSPL6_qFP</i>    | GAAGGAAAGCGAAGTTGTGC      |
| <i>HvSPL6_qRP</i>    | AAATTGGCGCATATTCCAAG      |
| <i>HvSPL13_qFP</i>   | GTGACCCGGGAAGTAGTCAG      |
| <i>HvSPL13_qRP</i>   | GCCACAAATTATCCCAGCAG      |
| <i>HvSPL15_qFP</i>   | CGGTAGCAGGGGTATAAATGG     |
| <i>HvSPL15_qRP</i>   | TCAAAACGGGAAGTAGGAGAG     |
| <i>HvSPL23_qFP</i>   | AGTGCAGCAGGTTCCATTTG      |
| <i>HvSPL23_qRP</i>   | CTCCGTGGTGATTAGCGAAC      |
| <i>HvSPL11.1V_FP</i> | CGCTTCGAAATTAGGTGGAG      |
| <i>HvSPL11.1V_RP</i> | TGGATTCATAGCCACTGCTG      |
| <i>HvSPL11.2V_FP</i> | TGCAAACCTGTGGTTATACAGC    |
| <i>HvSPL11.2V_RP</i> | ATTGCCACCTTTCTCATC        |
| <i>HvSPL20.1V_FP</i> | AGGAGCACCAGCACTTCATC      |
| <i>HvSPL20.1V_RP</i> | TGCTAAAGCCCAATACACC       |
| <i>HvSPL20.2V_FP</i> | GCAAGAAAGAGGGTCTGTGC      |
| <i>HvSPL20.2V_RP</i> | GCATGTGAATCCAGTGATGC      |
| <i>HvSPL8.1V_FP</i>  | CAGCCGGAATGTTCTTTCCGGTC   |
| <i>HvSPL8.1V_RP</i>  | GGTGTATCATCAATCTATCCATAGC |
| <i>HvSPL8.2V_FP</i>  | TACTTCCCCACCTTGGTCAG      |
| <i>HvSPL8.2V_RP</i>  | ACTGCTGGCAGAACCTCTGG      |
| <i>HvSPL8.3V_FP</i>  | CCGTCCATGTTTCTCTACC       |
| <i>HvSPL8.3V_RP</i>  | CCGGCTGCTTCTGTTTAC        |
| <i>HvActinF</i>      | GCCGTGCTTTCCCTCTATG       |
| <i>HvActinR</i>      | GCTTCTCCTTGATGTCCCTTA     |
| <i>HvGAPDHF</i>      | GTGAGGCTGGTGCTGATTA       |
| <i>HvGAPDHR</i>      | CGTGGTGCAGCTAGCATTTGAGAC  |
| <i>HvAP2_FP</i>      | AGGCCAAGTTCGACCAGAA       |
| <i>HvAP2_RP</i>      | CTGGGACTGAACTGCATGTG      |
